# Supplementary material for: Active ingredients isolated from Periplaneta americana L. inhibit the inflammation of the colonic mucosa and regulate the gut microbiota in DSS-induced ulcerative colitis in mice
Source: Front Pharmacol. 2025 Sep 19;16:1615989. doi: 10.3389/fphar.2025.1615989 (PMC12492031; doi:10.3389/fphar.2025.1615989)
Supplement: Supplementary file 2 [file Table3.xlsx]

## Sheet: Table3
id	CAS	KEGG_ID	FORMULA	EXACT_MASS	NAME_EN	CLASS_EN	q1	q3	ionmode	rt	PAW
616@[M-H]-@RANK1;STD_69-72-7@-@RANK1	69-72-7	C00805	C7H6O3	138.03169500000001;138.0317	Salicylic acid	Phenols;phytohormone	137	93	-	7.06	6.69262e+08
3277@[M-H]-@RANK1;STD_99-50-3@-@RANK1	99-50-3	C00230	C7H6O4	154.02661000000001;154.0266	Protocatechuic acid;protocatechuic acid	Phenols;flavonoids	153.05	108.95	-	3.43	3.43475e+08
64740@[M+H-H2O]+@RANK1	60-12-8	C05853	C8H10O	122.073	Phenethyl alcohol;2-Phenylethanol	Phenols	105.1	77	+	3.37362	2.92433e+08
69649@[M+H]+@RANK1	136790-76-6;333963-40-9	C13707	C20H32F2O5	390.222	Lubiprostone	Fatty Acyls	391.2	149	+	12.749	2.70089e+08
29@[M+H]+@RANK1;STD_147-85-3@+@RANK1	147-85-3	C00148	C5H9NO2	115.063329;115.0633	Proline;L-Proline	Amino acid and derivatives;amino acids	116.1	70.1	+	0.73	2.49307e+08
58150@[M+H]+@RANK1	344-25-2	C00763	C5H9NO2	115.063	D-Proline	Carboxylic acids and derivatives	116.1	70.1	+	0.755483	2.49307e+08
3020@[M+H]+@RANK1	5536-17-4;24356-66-9	C07195	C10H13N5O4	267.097	Vidarabine	Purine nucleosides	268.1	136.1	+	2.2804	2.30259e+08
86@[M+H]+@RANK1	58-61-7	C00212	C10H13N5O4	267.097	Adenosine	Nucleotide and its derivates	268.1	136.1	+	2.58482	2.30259e+08
4155@[M+H]+@RANK1	463-00-3	C01035	C5H11N3O2	145.085	4-Guanidinobutyric acid	Organic acids	146.1	86.1	+	1.314	2.21708e+08
6902@[M+H]+@RANK1	660-88-8	C00431	C5H11NO2	117.079	5-Aminovaleric acid	Amino acid and derivatives	118.1	55.1	+	1.10792	1.54792e+08
52@[M+H]+@RANK1	541-15-1	C00318	C7H15NO3	161.105	L-Carnitine	Organonitrogen compounds	162.1	43	+	0.68835	1.48738e+08
84@[M+H]+@RANK1	58-63-9	C00294	C10H12N4O5	268.081	Inosine	Nucleotide and its derivates	269.1	137	+	2.6016	1.42366e+08
13@[M+H]+@RANK1;STD_74-79-3@+@RANK1	74-79-3	C00062	C6H14N4O2	174.11167599999999;174.11170000000001	L-Arginine	Amino acid and derivatives;amino acids	175.1	70.05	+	0.6	1.39224e+08
12@[M+H]+@RANK1	2623-91-8	C02261	C4H9NO2	103.063	D-alpha-Aminobutyric acid	Carboxylic acids and derivatives	104.1	58.1	+	0.648333	1.34378e+08
5683@[M+H]+@RANK1	492-27-3	C01717	C10H7NO3	189.043	Kynurenic acid	Alkaloids	190	144	+	4.36405	1.055e+08
7016@[M+H]+@RANK1	3471-31-6	C05660	C11H11NO3	205.074	Methoxyindoleacetic acid	Indoles and derivatives	206.1	160.1	+	3.75962	9.82581e+07
28@[M+H]+@RANK1;63528@[M+H]+@RANK1;65707@[M+H]+@RANK1;STD_63-91-2@+@RANK1	63-91-2;673-06-3;150-30-1	C00079;C02265;C02057	C9H11NO2	165.078979;165.07900000000001	L-Phenylalanine;D-(+)-Phenylalanine;DL-Phenylalanine	Amino acid and derivatives;Phenols;amino acids	166.1	120.1	+	2.81977	9.41443e+07
3934@[M+H]+@RANK1	94-09-7	C07527	C9H11NO2	165.079	Benzocaine	Benzene and substituted derivatives	166.1	120	+	3.04835	9.41443e+07
66571@[M+H]+@RANK1	100-42-5	C07083	C8H8	104.063	Styrene	Benzene and substituted derivatives	105.1	51	+	3.37362	7.57079e+07
44803@[M+H]+@RANK1	14639-25-9;98-98-6	C10164	C6H5NO2	123.032	2-Picolinic acid	Organic acids	124	78	+	1.3261	7.23801e+07
35@[M+H]+@RANK1;STD_72-18-4@+@RANK1	72-18-4	C00183	C5H11NO2	117.078979;117.07899999999999	L-Valine	Amino acid and derivatives;amino acids	118.1	72.1	+	0.93	7.22335e+07
35949@[M+H]+@RANK1	6600-40-4	C01826	C5H11NO2	117.079	DL-Norvaline	Amino acid and derivatives	118.1	72.1	+	1.05125	7.22335e+07
STD_87-51-4@+@RANK1	87-51-4	C00954	C10H9NO2	175.063	Indole-3-acetic acid	phytohormone	176	130	+	7.14	6.00839e+07
66971@[M+H]+@RANK1	1818-71-9	C08432	C10H13N5O5	283.092	Crotonoside	Alkaloids	284.1	152.1	+	2.39745	5.7619e+07
3485@[M+H]+@RANK1	7665-99-8	C00942	C10H12N5O7P	345.047	Guanosine 3',5'-cyclic monophosphate	Nucleotide and its derivates	346.1	152.1	+	2.25995	5.67934e+07
68293@[M+H]+@RANK1	2492-09-3	C10383	C18H27NO5	337.189	Sarracine	Alkaloids	338.2	55.1	+	13.1412	4.96785e+07
86189@[M+H]+@RANK1	7159-86-6		C18H27NO5	337.189	3alpha,6beta-Ditigloyloxytropan-7beta-ol	Alkaloids	338.2	55.1	+	13.2084	4.96785e+07
618@[M-H]-@RANK1	490-79-9	C00628	C7H6O4	154.027	Gentisic acid	Phenols	153	108	-	3.61772	4.91033e+07
4148@[M+H]+@RANK1;63105@[M+H]+@RANK1;88534@[M+H]+@RANK1	501-97-3;120-47-8;495-78-3	C01744;C01198	C9H10O3	166.063	Phloretic acid;Ethylparaben;3-(2-Hydroxyphenyl)propanoic acid	Phenols;Phenylpropanoic acids	167.1	121.067	+	2.84044	4.70856e+07
93101@[M+H]+@RANK1	1854-30-4		C4H9NO2	103.063	O-Acetylethanolamine	Alkaloids	104.1	44	+	0.671567	4.52534e+07
1497@[M+H]+@RANK1	98-92-0	C00153	C6H6N2O	122.048	Nicotinamide	Alkaloids	123.1	80.1	+	1.01434	4.06468e+07
26@[M+H]+@RANK1;STD_63-68-3@+@RANK1	63-68-3	C00073	C5H11NO2S	149.05105;149.05099999999999	L-Methionine	Amino acid and derivatives;amino acids	150.05	56.1	+	0.94	3.92072e+07
25@[M+H]+@RANK1;STD_56-85-9@+@RANK1;STD_56-87-1@+@RANK1	56-87-1;56-85-9	C00047;C00064	C6H14N2O2;C5H10N2O3	146.10552799999999;146.06909999999999;146.10550000000001	L-Lysine;L-Glutamine	Amino acid and derivatives;amino acids	147.1	84.0667	+	0.64	3.65383e+07
63630@[M+H]+@RANK1	5959-95-5	C00819	C5H10N2O3	146.069	D-Glutamine	Carboxylic acids and derivatives	147.1	84	+	0.658483	3.65383e+07
66526@[M+H]+@RANK1	104-87-0	C06758	C8H8O	120.058	4-Methylbenzaldehyde	Benzene and substituted derivatives	121.1	77	+	2.48412	3.56472e+07
3459@[M+H]+@RANK1	634-01-5	C02353	C10H12N5O6P	329.053	Adenosine 2',3'-cyclic phosphate	Purine nucleotides	330.1	136.1	+	1.85558	3.39997e+07
66434@[M+H]+@RANK1	6190-65-4	C06559	C6H10ClN5	187.062	Deethylatrazine	Triazines	188.1	146	+	3.80997	3.35582e+07
STD_487-89-8@+@RANK1	487-89-8	C08493	C9H7NO	145.053	Indole-3-carboxaldehyde	phytohormone	146	118	+	6.73	3.20003e+07
23@[M+H]+@RANK1;24@[M+H]+@RANK1	73-32-5;61-90-5	C00407;C00123	C6H13NO2	131.095	L-Isoleucine;L-Leucine	Amino acid and derivatives	132.1	86.1	+	1.77934	3.16424e+07
71198@[M+H]+@RANK1	443-79-8	C16434;C06418	C6H13NO2	131.095	Isoleucine	Amino acid and derivatives	132.1	86.1	+	1.79602	3.16424e+07
6334@[M+H]+@RANK1	327-57-1	C01933	C6H13NO2	131.095	L-Norleucine	Amino acid and derivatives	132.1	86.1	+	1.8128	3.16424e+07
286@[M+H]+@RANK1	120-72-9	C00463	C8H7N	117.058	Indole	Alkaloids	118.1	91.1	+	3.81955	3.09476e+07
63103@[M+H]+@RANK1	692-04-6	C02727	C8H16N2O3	188.116	N6-Acetyl-L-lysine	Amino acid and derivatives	189.1	84.1	+	0.805833	2.51704e+07
44784@[M+H]+@RANK1	2497-02-1	C02997	C8H11N3O3	197.08	N-Acetyl-L-histidine	Carboxylic acids and derivatives	198.1	110.1	+	0.772267	2.4779e+07
6377@[M+H]+@RANK1	22839-47-0	C11045	C14H18N2O5	294.122	Asp-Phe methyl ester;Aspartame	Carboxylic acids and derivatives	295.1	120.1	+	3.05875	2.08696e+07
50@[M+H]+@RANK1	535-75-1;3105-95-1	C00408	C6H11NO2	129.079	L-Pipecolic acid	Amino acid and derivatives	130.1	84.1	+	0.68835	2.00232e+07
290@[M+H]+@RANK1	65-71-4	C00178	C5H6N2O2	126.043	Thymine	Nucleotide and its derivates	127.1	54	+	2.10945	1.93539e+07
3711@[M+H]+@RANK1	60-35-5	C06244	C2H5NO	59.0371	Acetamide	Alkaloids	60	43	+	13.947	1.86422e+07
61@[M+H]+@RANK1	104-14-3	C04227	C8H11NO2	153.079	p-Octopamine	Phenols	154.1	91.1	+	3.83577	1.85456e+07
19@[M+H]+@RANK1;STD_56-86-0@+@RANK1	56-86-0	C00025	C5H9NO4	147.05315899999999;147.0532	L-Glutamic acid	Amino acid and derivatives;amino acids	148.1	84	+	0.66	1.80779e+07
345@[M-H]-@RANK1	526-95-4	C00257	C6H12O7	196.058	Gluconic acid	Carbohydrates	195.1	75	-	0.6921	1.7411e+07
16@[M+H]+@RANK1;STD_372-75-8@+@RANK1	372-75-8	C00327	C6H13N3O3	175.09569200000001;175.09569999999999	L-Citruline;L-Citrulline	Amino acid and derivatives;amino acids	176.1	70.1	+	0.66	1.70591e+07
233@[M+H]+@RANK1	83-88-5	C00255	C17H20N4O6	376.138	Riboflavine	Vitamins	377.1	243.1	+	5.0561	1.66595e+07
27@[M+H]+@RANK1;STD_70-26-8@+@RANK1	70-26-8	C01602;C00077	C5H12N2O2	132.089878;132.0899	L-Ornithine	Amino acid and derivatives;amino acids	133.1	70.1	+	0.55	1.58062e+07
278@[M+H]+@RANK1	7418-61-3	C00576	C5H11NO	101.084	Betaine aldehyde	Organonitrogen compounds	102.1	58.1	+	0.753433	1.56775e+07
3833@[M+H]+@RANK1	192461-96-4	C14773	C20H34O4	338.246	8,9-DiHETrE	Fatty Acyls	339.3	95.1	+	13.0338	1.44058e+07
916@[M+NA]+@RANK1	4618-18-2	C07064	C12H22O11	342.116	Lactulose	Organooxygen compounds	365.1	203.1	+	0.772267	1.28429e+07
62463@[M+NA]+@RANK1	547-25-1	C19636	C12H22O11	342.116	Turanose	Fatty Acyls	365.1	203.1	+	0.78905	1.28429e+07
137@[M+NA]+@RANK1	57-50-1	C00089	C12H22O11	342.116	Sucrose	Carbohydrates	365.1	203.1	+	0.8918	1.28429e+07
3260@[M+H]+@RANK1	103-81-1	C02505	C8H9NO	135.068	2-Phenylacetamide	Benzene and substituted derivatives	136.1	119	+	2.5228	1.2709e+07
68364@[M+H]+@RANK1	501-13-3	C10497	C14H20N2O3	264.147	N-Feruloyl putrescine	Phenolamides	265.2	72.1	+	4.33173	1.2135e+07
69416@[M+H]+@RANK1	108-64-5	C12290	C7H14O2	130.099	Ethyl isovalerate	Miscellaneous	131.1	57.1	+	1.19058	1.13732e+07
505@[M-H]-@RANK1	123-31-9	C00530	C6H6O2	110.037	Hydroquinone	Phenols	109	108	-	4.04678	1.10226e+07
34478@[M+H]+@RANK1	61-19-8	C00020	C10H14N5O7P	347.063	Adenosine 5'-monophosphate	Nucleotide and its derivates	348.1	136.1	+	1.38347	1.09294e+07
3425@[M+H]+@RANK1	2457-80-9	C00170	C11H15N5O3S	297.09	5'-S-Methyl-5'-thioadenosine	Nucleotide and its derivates	298.1	136.1	+	3.99432	1.00316e+07
86434@[M+H]+@RANK1	134-20-3	C20634	C8H9NO2	151.063	Methyl anthranilate	Alkaloids	152.1	135	+	2.1149	9.94437e+06
47700@[M+H]+@RANK1	51225-30-0	C10542	C20H18O5	338.115	Wighteone	Flavonoids	339.1	55.1	+	13.007	9.76877e+06
37@[M+H]+@RANK1	62-57-7	C03665	C4H9NO2	103.063	2-Aminoisobutyric acid	Amino acid and derivatives	104.1	58.1	+	0.9827	9.59119e+06
277@[M+H]+@RANK1	1118-68-9	C01026	C4H9NO2	103.063	N,N-Dimethylglycine	Amino acid and derivatives	104.1	58.1	+	1.03728	9.59119e+06
3318@[M+H]+@RANK1	107-73-3	C00588	C5H14NO4P	183.066	Phosphorylcholine	Cholines	184.1	86.1	+	0.665867	9.42636e+06
75@[M+H]+@RANK1	106-60-5	C00430	C5H9NO3	131.058	5-Aminolevulinate	Organic acids	132.1	55	+	1.5553	8.52655e+06
7044@[M-H]-@RANK1	501-94-0	C06044	C8H10O2	138.068	2-(4-Hydroxyphenyl)ethanol	Phenols	137.1	93	-	4.15287	8.10975e+06
34541@[M+H]+@RANK1	59-48-3	C12312	C8H7NO	133.053	indolin-2-one	Alkaloids	134.1	77	+	5.67433	7.84079e+06
6891@[M+H]+@RANK1	220805-22-1;30315-93-6	C03626	C8H18N4O2	202.143	NG,NG-Dimethylarginine dihydrochloride	Carboxylic acids and derivatives	203.2	70.1	+	0.7442	7.78672e+06
5785@[M+H]+@RANK1	1198-84-1	C11527	C8H8O4	168.042	p-Hydroxymandelic acid	Phenols	169	123	+	3.35683	6.96652e+06
66605@[M+H]+@RANK1	620-23-5	C07209	C8H8O	120.058	3-Methylbenzaldehyde	Benzene and substituted derivatives	121.1	91.1	+	2.48412	6.94773e+06
241@[M+H]+@RANK1	137-08-6;79-83-4	C00864;C12276	C9H17NO5	219.111	D-Pantothenic acid	Vitamins	220.1	90.1	+	2.8618	6.91049e+06
133@[M+H-H2O]+@RANK1;58151@[M+H-H2O]+@RANK1	492-62-6;87-81-0	C00267;C00795	C6H12O6	180.063	alpha-D-Glucose;D-Tagatose	Carbohydrates;Organooxygen compounds	163.1	85	+	0.755158	6.56179e+06
21@[M+H]+@RANK1;STD_71-00-1@+@RANK1	71-00-1	C00135	C6H9N3O2	155.06947700000001;155.06950000000001	L-Histidine	Amino acid and derivatives;amino acids	156.1	110.1	+	0.59	6.35739e+06
92888@[M+H]+@RANK1	17910-09-7		C15H20O	216.151	Curzerene	Sesquiterpenoids	217.2	55.1	+	2.54623	6.24331e+06
66838@[M+H]+@RANK1	107868-30-4	C08162	C20H24O2	296.178	Exemestane	Steroids and steroid derivatives	297.2	121.1	+	11.614	6.17457e+06
58358@[M+H]+@RANK1	100-52-7	C00261	C7H6O	106.042	Benzaldehyde	Phenols	107	79	+	2.81978	6.06792e+06
64468@[M+H]+@RANK1	29539-03-5	C17756	C8H9NO2	151.063	Leukoaminochrome	Indoles and derivatives	152.1	80	+	2.41698	5.9594e+06
34552@[M-H]-@RANK1	80-59-1	C08279	C5H8O2	100.052	Tiglic acid	Miscellaneous	99	82	-	1.11253	5.95692e+06
1301@[M-H]-@RANK1	495-69-2	C01586	C9H9NO3	179.058	Hippuric acid	Alkaloids	178.1	77	-	4.72125	5.95517e+06
3453@[M-H]-@RANK1	58-97-9	C00105	C9H13N2O9P	324.036	Uridine 5'-monophosphate	Nucleotide and its derivates	323	79	-	1.39282	5.90998e+06
66609@[M+H]+@RANK1	529-20-4	C07214	C8H8O	120.058	2-Methylbenzaldehyde	Benzene and substituted derivatives	121.1	103.1	+	2.48412	5.81644e+06
STD_120-80-9@-@RANK1	120-80-9	C00090	C6H6O2	110.037	pyrocatechol	flavonoids	109	90.9	-	4.09	5.67705e+06
315@[M+H]+@RANK1	73-40-5	C00242	C5H5N5O	151.049	Guanine	Nucleotide and its derivates	152.1	135	+	2.62792	5.65408e+06
11@[M+H]+@RANK1;63614@[M+H]+@RANK1;STD_56-41-7@+@RANK1	302-72-7;56-41-7	C01401;C00041	C3H7NO2	89.047679000000002;89.047700000000006	DL-Alanine;L-Alanine	Alkaloids;Amino acid and derivatives;amino acids	90.1	44	+	0.644928	5.50992e+06
66970@[M+H]+@RANK1	73-03-0	C08431	C10H13N5O3	251.102	Cordycepin	Nucleotide and its derivates	252.1	136.1	+	2.34785	5.12134e+06
63895@[M+H]+@RANK1	4754-39-6	C05198	C10H13N5O3	251.102	5'-Deoxyadenosine	Nucleotide and its derivates	252.1	136.1	+	2.40859	5.12134e+06
35690@[M+H]+@RANK1	3347-90-8	C05984	C4H8O3	104.047	2-Hydroxybutanoic acid	Organic acids	105.1	59	+	0.6372	5.07531e+06
283@[M+H]+@RANK1	71-30-7	C00380	C4H5N3O	111.043	Cytosine	Nucleotide and its derivates	112.1	95	+	0.630266	5.05641e+06
64942@[M+H]+@RANK1	537-73-5	C10470	C10H10O4	194.058	3-Hydroxy-4-methoxycinnamic acid;Isoferulic acid	Phenylpropanoids	195.1	149.1	+	4.86728	4.79546e+06
58012@[M+H]+@RANK1	578-76-7	C02242	C6H7N5O	165.065	7-Methylguanine	Imidazopyrimidines	166.1	149	+	1.56107	4.63122e+06
44433@[M+H]+@RANK1	3081-61-6	C01047	C7H14N2O3	174.1	L-Theanine	Amino acid and derivatives	175.1	84	+	0.848767	4.54986e+06
3231@[M+H]+@RANK1	7664-38-2	C00009	H3O4P	97.9769	Phosphoric acid	Organic acids	99	81	+	0.64835	4.434e+06
43866@[M+H]+@RANK1	1188-21-2	C02710	C8H15NO3	173.105	N-Acetyl-l-leucine	Amino acid and derivatives	174.1	86.1	+	5.37673	4.25548e+06
3490@[M-H]-@RANK1	131-99-7	C00130	C10H13N4O8P	348.047	Inosine 5'-monophosphate;Inosinic acid	Nucleotide and its derivates	347	79	-	1.5555	4.09657e+06
44020@[M+H]+@RANK1	485-71-2	C11379	C19H22N2O	294.173	(-)-Cinchonidine	Alkaloids	295.2	81.1	+	11.9941	3.94359e+06
67975@[M+H]+@RANK1	103548-82-9	C09866	C16H20N2O	256.158	Huperzine B	Alkaloids	257.2	198.1	+	3.82959	3.44855e+06
58568@[M+H]+@RANK1		C06010	C5H8O4	132.042	(S)-2-Acetolactate	Keto acids and derivatives	133	87	+	1.31908	3.29258e+06
63099@[M+H-H2O]+@RANK1	551-84-8	C00310	C5H10O5	150.053	D-Xylulose	Carbohydrates	133.1	43	+	1.76245	3.23411e+06
89700@[M+H]+@RANK1	26315-07-1		C29H46O	410.355	22-Dehydroclerosterol	Steroids	411.4	93.1	+	12.5874	3.12128e+06
84974@[M+H-H2O]+@RANK1	52659-56-0		C20H34O4	338.246	Kirenol	Diterpenoids	321.2	81.1	+	13.158	3.07151e+06
3422@[M+H]+@RANK1	118-10-5	C06528	C19H22N2O	294.173	Cinchonine	Alkaloids	295.2	79.1	+	11.9941	3.0537e+06
94498@[M+H]+@RANK1	57726-26-8		C9H12O2	152.084	4-(Ethoxymethyl)phenol	Phenols	153.1	107	+	2.6294	3.04179e+06
58355@[M+H]+@RANK1		C05595	C13H15NO6	281.09	4-Hydroxyphenylacetylglutamic acid		282.1	107	+	12.9902	3.00756e+06
5453@[M+H]+@RANK1	83-34-1	C08313	C9H9N	131.073	3-Methylindole	Alkaloids	132.1	130.1	+	3.80997	2.84408e+06
1873@[M+H]+@RANK1	137-00-8	C04294	C6H9NOS	143.04	4-Methyl-5-thiazoleethanol	Azoles	144	113	+	2.65588	2.79956e+06
44759@[M-H]-@RANK1	32449-92-6	C02670	C6H8O6	176.032	D-Glucurono-6,3-lactone	Furofurans	175	85	-	4.21593	2.70611e+06
968@[M-H]-@RANK1	102-32-9	C01161	C8H8O4	168.042	3,4-Dihydroxyphenylacetic acid	Phenols	167	123	-	3.0487	2.61453e+06
5750@[M-H]-@RANK1	123-99-9	C08261	C9H16O4	188.105	Azelaic Acid	Organic acids	187.1	125.1	-	6.8058	2.5518e+06
62927@[M+H]+@RANK1	121-33-5	C00755	C8H8O3	152.047	Vanillin	Phenols	153.1	65	+	5.89592	2.46067e+06
65607@[M+H]+@RANK1	556-03-6	C01536	C9H11NO3	181.074	DL-Tyrosine	Alkaloids	182.1	136.1	+	1.89672	2.4535e+06
STD_60-18-4@+@RANK1	60-18-4	C00082	C9H11NO3	181.074	L-Tyrosine	amino acids	182.1	136.1	+	1.93	2.4535e+06
1501@[M+H]+@RANK1	701-44-0	C05842	C7H8N2O2	152.059	N1-Methyl-2-pyridone-5-carboxamide	Pyridines and derivatives	153.1	108	+	2.62783	2.3389e+06
54@[M-H]-@RANK1	1071-23-4	C00346	C2H8NO4P	141.019	O-Phosphorylethanolamine	Miscellaneous	140	79	-	0.69215	2.27594e+06
43509@[M+H]+@RANK1	521-88-0		C18H12O4	292.074	Karanjin	Flavonoids	293.1	105	+	11.6673	2.10997e+06
3300@[M+H]+@RANK1	499-12-7;585-84-2	C00417	C6H6O6	174.016	cis-Aconitic acid	Organic acids and derivatives	175	69	+	1.4555	2.10933e+06
1502@[M+H]+@RANK1	769-49-3	C05843	C7H8N2O2	152.059	N1-Methyl-4-pyridone-3-carboxamide	Pyridines and derivatives	153.1	136	+	2.65573	2.07429e+06
90607@[M+H]+@RANK1	74683-19-5		C11H10O4	206.058	3-Methoxy-4,5-methylenedioxycinnamaldehyde	Phenylpropanoids	207.1	189.1	+	5.04263	2.02881e+06
65893@[M+H]+@RANK1	119-67-5	C03057	C8H6O3	150.032	2-Carboxybenzaldehyde	Phenols	151	105	+	3.07152	1.99812e+06
65746@[M+H]+@RANK1	80-69-3	C02287	C3H4O5	120.006	Hydroxypropanedioic acid	Carboxylic acids and derivatives	121	103	+	2.76943	1.98587e+06
298@[M+H]+@RANK1	104-98-3	C00785	C6H6N2O2	138.043	Urocanic acid	Azoles	139.1	93	+	4.20503	1.92948e+06
258@[M+H]+@RANK1	66-22-8	C00106	C4H4N2O2	112.027	Uracil	Nucleotide and its derivates	113	70	+	1.9101	1.88317e+06
68349@[M+H]+@RANK1	1929-30-2	C10476	C12H14O3	206.094	Ethyl trans-p-methoxycinnamate	Cinnamic acids and derivatives	207.1	133.1	+	4.96798	1.84842e+06
69785@[M+H]+@RANK1		C14086	C11H10O4	206.058	2-Hydroxy-3-methylbenzalpyruvate		207.1	133.1	+	5.06868	1.84842e+06
64457@[M+H]+@RANK1	110-89-4	C01746	C5H11N	85.0891	Piperidine	Alkaloids	86.1	69.1	+	2.24915	1.73361e+06
161@[M-H]-@RANK1;3333@[M-H]-@RANK1	6556-12-3;6294-16-2;685-73-4	C00191;C16245;C00333	C6H10O7	194.043	D-glucoronic acid;D-Galacturonic acid	Carbohydrates;Organic acids	193	59	-	0.70965	1.64439e+06
190@[M+H]+@RANK1;3407@[M+H]+@RANK1;3553@[M+H]+@RANK1	112-80-1;693-72-1;593-39-5	C00712;C08367;C08363	C18H34O2	282.256	Oleic acid;Vaccenic acid;Petroselinic acid	Fatty Acyls	283.3	57.1	+	13.0279	1.63937e+06
34536@[M-H]-@RANK1	2018-61-3	C03519	C11H13NO3	207.09	N-Acetyl-L-phenylalanine	Amino acid and derivatives	206.1	58	-	5.87738	1.58244e+06
68535@[M+H]+@RANK1	6159-55-3	C10733	C11H12N2O	188.095	Vasicine	Alkaloids	189.1	171.1	+	3.75962	1.56199e+06
62451@[M+H]+@RANK1	123-08-0	C00633	C7H6O2	122.037	4-Hydroxybenzaldehyde	Phenols	123	77	+	1.90511	1.53174e+06
413@[M-H]-@RANK1	69-79-4	C00208	C12H22O11	342.116	D-Maltose	Carbohydrates	341.1	59	-	0.764067	1.51682e+06
62465@[M+H-H2O]+@RANK1	2140-29-6	C19632	C12H22O11	342.116	Kojibiose	Fatty Acyls	325.1	85	+	0.721917	1.44612e+06
62906@[M+H]+@RANK1	64-04-0	C05332	C8H11N	121.089	Phenethylamine	Benzene and substituted derivatives	122.1	105.1	+	2.81978	1.43497e+06
33@[M+H]+@RANK1;65364@[M+H]+@RANK1;65534@[M+H]+@RANK1;STD_73-22-3@+@RANK1	54-12-6;73-22-3;153-94-6	C00806;C00078;C00525	C11H12N2O2	204.089878;204.0899	Tryptophan;L-Tryptophan;D-Tryptophan	Alkaloids;Amino acid and derivatives;Indoles and derivatives;amino acids	205.1	188.1	+	3.76937	1.40508e+06
45872@[M+H]+@RANK1		C03824	C6H7NO3	141.043	2-Aminomuconate semialdehyde	Carboxylic acids and derivatives	142	96	+	1.19183	1.38691e+06
62374@[M+H]+@RANK1	5142-22-3	C02216	C6H7N5	149.07	1-Methyladenine	Nucleotide and its derivates	150.1	94	+	1.30932	1.38546e+06
64445@[M+H]+@RANK1;64446@[M+H]+@RANK1	3423-27-6;3423-26-5	C12452;C12453	C10H17NO2	183.126	Tropine acetate;3-Acetoxytropane	Alkaloids	184.1	124.1	+	3.23935	1.35796e+06
88569@[M+H]+@RANK1	101-97-3		C10H12O2	164.084	Ethyl phenylacetate	Phenols	165.1	91.1	+	2.43377	1.33412e+06
63096@[M-H]-@RANK1	636-61-3	C00497	C4H6O5	134.022	L(-)-Malic acid	Fatty Acyls	133	71	-	0.774025	1.33262e+06
118@[M-H]-@RANK1	6915-15-7;97-67-6	C00149	C4H6O5	134.022	Malic acid	Hydroxy acids and derivatives	133	71	-	0.797233	1.33262e+06
41074@[M+H-H2O]+@RANK1	18457-55-1	C02452	C10H16O	152.12	(S)-(-)-Perillyl alcohol	Monoterpenoids	135.1	91.1	+	11.6024	1.33183e+06
41101@[M+H]+@RANK1;41120@[M+H]+@RANK1;91004@[M+H]+@RANK1	106-22-9;1117-61-9;7540-51-4	C09849;C11386	C10H20O	156.151	beta-Citronellol;(S)-(-)-beta-Citronellol	Monoterpenoids	157.2	139.1	+	1.41002	1.32459e+06
36036@[M+H-H2O]+@RANK1	33964-75-9	C04717	C18H32O4	312.23	13-HPODE;13-L-Hydroperoxylinoleic acid	Lipids	295.2	55.1	+	11.978	1.31939e+06
89890@[M+H]+@RANK1	112-63-0		C19H34O2	294.256	Methyl linoleate	Miscellaneous	295.3	55.1	+	12	1.31939e+06
36019@[M+H-H2O]+@RANK1	29774-12-7	C14827	C18H32O4	312.23	(10E,12Z)-(9S)-9-Hydroperoxyoctadeca-10,12-dienoic acid	Fatty Acyls	295.2	55.1	+	11.9594	1.31939e+06
339@[M-H]-@RANK1	3237-44-3	C02504	C7H12O5	176.068	2-Isopropylmalate	Fatty Acyls	175.1	115	-	4.22863	1.31933e+06
3408@[M+H]+@RANK1	146-80-5	C01762	C10H12N4O6	284.076	Xanthosine	Nucleotide and its derivates	285.1	153	+	2.61038	1.28624e+06
155@[M-H]-@RANK1	2255-14-3	C00446;C03384	C6H13O9P	260.03	Galactose 1-phosphate	Organooxygen compounds	259	79	-	0.64585	1.24344e+06
58313@[M+H]+@RANK1	58253-27-3;23513-14-6	C10462	C17H26O4	294.183	6-Gingerol; 6-Gingerol;[6]-Gingerol;Gingerol	Phenols	295.2	151.1	+	11.9862	1.22792e+06
167@[M+H-H2O]+@RANK1	474-62-4	C01789	C28H48O	400.371	Campesterol	Steroids and steroid derivatives	383.4	147.1	+	12.1844	1.2134e+06
65@[M+H]+@RANK1	5001-33-2	C05588	C10H15NO3	197.105	Metanephrine	Phenols	198.1	180.1	+	2.13168	1.18909e+06
6984@[M+H]+@RANK1		C04368	C9H11NO3	181.074	Beta-Tyrosine	Carboxylic acids and derivatives	182.1	123	+	2.41698	1.15768e+06
68856@[M+H]+@RANK1	620-02-0	C11115	C6H6O2	110.037	5-Methyl-2-furaldehyde		111	55.1	+	0.755483	1.13955e+06
69654@[M+H]+@RANK1	27210-57-7	C13715	C19H22O2	282.162	Miltirone	Diterpenoids	283.2	55.1	+	12.9769	1.09787e+06
41071@[M+H]+@RANK1;53347@[M+H]+@RANK1	464-45-9;464-43-7	C01766;C01765	C10H18O	154.136	(-)-Borneol;(+)-Borneol	Monoterpenoids	155.1	137.1	+	3.42397	1.01692e+06
64043@[M+H]+@RANK1;71308@[M+H]+@RANK1	10482-56-1;149-29-1	C11393;C16748	C10H18O;C7H6O4	154.13576499999999;154.02661000000001	Alpha-Terpineol;Patulin	Monoterpenoids;Pyrans	155.05	137.05	+	3.45653	1.01692e+06
53784@[M+H]+@RANK1;91039@[M+H]+@RANK1	127-22-0;464-98-2	C08637	C30H50O	426.386	Taraxerol;Pseudotaraxasterol	Triterpenoids	427.4	409.4	+	12.7121	966012
64742@[M+H]+@RANK1	1086-80-2	C01727	C12H10N4O2	242.08	Lumichrome	Alkaloids	243.1	198.1	+	6.69662	955277
67511@[M+H]+@RANK1	38647-10-8	C09202	C20H24O7	376.152	Tripdiolide	Diterpenoids	377.2	359.1	+	5.13582	912868
3375@[M+H]+@RANK1	50-89-5	C00214	C10H14N2O5	242.09	Thymidine	Nucleotide and its derivates	243.1	127	+	3.04042	908680
STD_2365-40-4@+@RANK1	2365-40-4	C04083	C10H13N5	203.117	N6-(delta 2-Isopentenyl)-adenine	phytohormone	204	136	+	5.3	873128
287@[M+H]+@RANK1	590-46-5;107-43-7	C00719	C5H11NO2	117.079	Betaine	Alkaloids	118.1	58.1	+	1.05543	844206
3316@[M+H]+@RANK1	331-39-5	C01481	C9H8O4	180.042	Caffeic acid	Phenylpropanoids	181	163	+	4.4394	838413
66134@[M+H]+@RANK1	99-98-9	C04203	C8H12N2	136.1	N,N-Dimethyl-1,4-phenylenediamine		137.1	120.1	+	2.55652	790835
2202@[M+H]+@RANK1	65-23-6	C00314	C8H11NO3	169.074	Pyridoxine	Vitamins	170.1	134.1	+	1.55165	788733
65711@[M+H]+@RANK1	96-09-3	C02083	C8H8O	120.058	Styrene Oxide	Benzene and substituted derivatives	121.1	103.1	+	5.9414	752013
3419@[M-H]-@RANK1	154-23-4	C06562	C15H14O6	290.079	Catechin	Flavonoids	289.1	109	-	6.04555	751006
58136@[M+H]+@RANK1	3316-09-4	C02235	C6H5NO4	155.022	4-Nitrocatechol	Phenols	156	110	+	1.24218	745487
67886@[M+H]+@RANK1	79-69-6;35124-13-1	C09690	C14H22O	206.167	alpha-Irone	Prenol lipids	207.2	147.1	+	5.0519	736604
6015@[M+H]+@RANK1	15569-97-8	C19579	C9H11NO3	181.074	gamma-Hydroxy-3-pyridinebutanoate	Pyridines and derivatives	182.1	164.1	+	4.3638	736490
90637@[M+H]+@RANK1	107647-14-3		C18H30O4	310.214	Sterebin A	Diterpenoids	311.2	293.2	+	11.7548	736307
6193@[M+H]+@RANK1	120-73-0	C15587	C5H4N4	120.044	Purine	Nucleotide and its derivates	121.1	94	+	2.04777	735300
41033@[M+H]+@RANK1	521-35-7	C07580	C21H26O2	310.193	Cannabinol	Phenols	311.2	91.1	+	11.7538	734384
324@[M+H]+@RANK1;3271@[M+H]+@RANK1	542-32-5;1118-90-7	C00956	C6H11NO4	161.069	L-Homoglutamic acid	Amino acid and derivatives	162.1	98.1	+	0.728117	688383
58201@[M+H]+@RANK1	18766-67-1	C05604	C9H9NO4	195.053	Leucodopachrome	Indoles and derivatives	196.1	150.1	+	4.81693	685944
402@[M+H]+@RANK1	57-83-0	C00410	C21H30O2	314.225	Progesterone	Steroids	315.2	97.1	+	11.6043	676737
68016@[M+H]+@RANK1	19902-91-1	C09926	C15H16O5	276.1	Dihydromethysticin	Phenols	277.1	135	+	11.9665	672713
95700@[M+H]+@RANK1	168293-10-5		C10H12O5	212.068	C-Veratroylglycol	Phenylpropanoids	213.1	123	+	3.47443	671602
68576@[M+H]+@RANK1	501-26-8	C10785	C21H34O	302.261	Cardanol (C15:1)	Phenols	303.3	107	+	12.6881	659270
66928@[M+H]+@RANK1	2179-57-9	C08369	C6H10S2	146.022	Diallyl disulfide	Miscellaneous	147	41	+	0.678083	640961
103463@[M+H]+@RANK1	1121-25-1		C6H7NO	109.053	3-Hydroxy-2-methylpyridine	Alkaloids	110.1	39	+	1.43665	636685
71724@[M+H]+@RANK1	486-21-5	C17480	C11H10O5	222.053	Isofraxidin	Phenylpropanoids	223.1	205.1	+	4.24908	630195
58549@[M+H]+@RANK1		C03267	C6H13O9P	260.03	Beta-D-Fructose 2-phosphate	Organooxygen compounds	261	99	+	0.749217	620371
41102@[M+H]+@RANK1;53332@[M+H]+@RANK1	7787-20-4	C09859	C10H16O	152.12	(-)-Fenchone	Monoterpenoids	153.1	79.1	+	3.06885	615349
69790@[M+H]+@RANK1	162794-83-4	C14095	C11H8O6	236.032	2-Hydroxy-3-carboxybenzalpyruvate		237	191	+	11.1273	611306
35860@[M+H]+@RANK1	54232-59-6	C14766	C18H30O3	294.219	9-OxoODE	Fatty Acyls	295.2	277.2	+	11.978	610499
35389@[M+H]+@RANK1	67597-26-6	C04785	C18H30O4	310.214	13(S)-HPOT	Fatty acyls	311.2	69.1	+	11.4653	608096
5671@[M+H-H2O]+@RANK1	611-71-2	C01983	C8H8O3	152.047	Mandelic acid	Phenols	135	79.1	+	11.5972	597768
71640@[M+H]+@RANK1		C17366	C7H11NO4	173.069	(2S,5S)-trans-Carboxymethylproline		174.1	128.1	+	1.37645	594546
89559@[M+H]+@RANK1	122-69-0		C18H16O2	264.115	Cinnamyl cinnamate	Phenylpropanoids	265.1	117.1	+	4.2631	579632
229@[M+H]+@RANK1	59-43-8	C00378	C12H16N4OS	264.104	Thiamine	Vitamins	265.1	122.1	+	0.700883	579481
480@[M+H]+@RANK1	144-90-1	C05145	C4H9NO2	103.063	3-Aminoisobutanoic acid	Amino acid and derivatives	104.1	30	+	0.9401	575606
88554@[M+H]+@RANK1	10210-17-0		C9H12O2	152.084	3-(4-Hydroxyphenyl)-1-propanol	Phenylpropanoids	153.1	135.1	+	3.0883	565493
3263@[M-H]-@RANK1	99-96-7	C00156	C7H6O3	138.032	4-Hydroxybenzoic acid	Phenols	137	93	-	1.07755	556248
4150@[M+H]+@RANK1	621-37-4	C05593	C8H8O3	152.047	3-Hydroxyphenylacetic acid	Phenols	153.1	107	+	5.0645	556186
85277@[M+H]+@RANK1	3777-69-3		C9H14O	138.104	2-Pentylfuran	Miscellaneous	139.1	55.1	+	1.10792	553313
36195@[M+H]+@RANK1	22973-19-9	C04654	C20H32O5	352.225	(13E)-11a-Hydroxy-9,15-dioxoprost-13-enoic acid	Fatty Acyls	353.2	335.2	+	11.4362	552958
44763@[M+H]+@RANK1;66396@[M+H]+@RANK1	119-65-3;91-22-5	C06323;C06413	C9H7N	129.058	Isoquinoline;Quinoline	Alkaloids;Quinolines and derivatives	130.1	103.1	+	6.126	540549
43210@[M+H]+@RANK1	544-31-0	C16512	C18H37NO2	299.282	Palmitoylethanolamide	Carboximidic acids and derivatives	300.3	62.1	+	12.6129	538890
485@[M+H]+@RANK1	470-30-4	C00966	C6H10O4	146.058	Ketopantoic acid		147.1	73.1	+	0.698867	523418
66886@[M+H]+@RANK1	156-56-9	C08287	C7H11NO2	141.079	L-Hypoglycin A	Carboxylic acids and derivatives	142.1	96.1	+	0.520517	517803
32@[M+H]+@RANK1;STD_72-19-5@+@RANK1	72-19-5	C00188	C4H9NO3	119.058244;119.0582	L-Threonine	Amino acid and derivatives;amino acids	120.1	56.1	+	0.64	514150
288@[M+H]+@RANK1;3713@[M+H]+@RANK1	1927-25-9;672-15-1;6027-21-0	C00263	C4H9NO3	119.058	L-Homoserine	Amino acid and derivatives	120.1	56	+	0.671183	514150
239@[M-H]-@RANK1	82-82-6	C00847	C8H9NO4	183.053	4-Pyridoxic acid	Pyridine derivatives	182	108	-	2.49643	503005
3451@[M-H]-@RANK1	365-07-1	C00364	C10H15N2O8P	322.057	5-Thymidylic acid	Pyrimidine nucleotides	321	79	-	2.2687	496728
STD_139-85-5@+@RANK1	139-85-5	C16700	C7H6O3	138.032	Protocatechualdehyde	flavonoids	138.9	120.8	+	4.2	495707
3275@[M-H]-@RANK1	548-93-6	C00632	C7H7NO3	153.043	3-Hydroxyanthranilic acid	Organic acids	152	108	-	2.42645	491689
2203@[M-H]-@RANK1	66-72-8	C00250	C8H9NO3	167.058	Pyridoxal	Pyridines and derivatives	166.1	108	-	3.79228	487182
3755@[M+H]+@RANK1;63118@[M+H]+@RANK1	492-61-5;492-62-6	C00221;C00267	C6H12O6	180.063	Beta-D-Glucose;alpha-D-Glucose	Organooxygen compounds	181.1	163.1	+	3.27292	487039
47602@[M+H]+@RANK1	7678-85-5	C02495	C15H10O5	270.053	2'-Hydroxydaidzein	Flavonoids	271.1	121	+	8.79448	477287
52423@[M+H]+@RANK1	120-05-8	C08730	C15H10O5	270.053	Sulfuretin	Flavonoids	271.1	121	+	8.89518	477287
3399@[M+H]+@RANK1	7690-51-9;134-04-3	C05904	C15H10O5	270.053	Pelargonidin	Flavonoids	271.1	121	+	8.98363	477287
1499@[M+H]+@RANK1	583-08-4	C05380	C8H8N2O3	180.053	Nicotinurate	Carboxylic acids and derivatives	181.1	135.1	+	3.27403	468978
35698@[M+H]+@RANK1		C14829	C18H34O4	314.246	12,13-DHOME	Fatty Acyls	315.3	71.1	+	11.8775	459093
30@[M+H]+@RANK1;STD_56-45-1@+@RANK1	56-45-1	C00065	C3H7NO3	105.04259399999999;105.04259999999999	L-Serine	Amino acid and derivatives;amino acids	106	60	+	0.62	449662
35687@[M+H]+@RANK1	312-84-5	C00740	C3H7NO3	105.043	D-Serine	Alkaloids	106	60	+	0.655383	449662
3301@[M+H]+@RANK1		C04236	C7H10O5	174.053	2-Isopropyl-3-oxosuccinate	Keto acids and derivatives	175.1	129.1	+	0.800867	443014
63455@[M+H]+@RANK1		C04076	C6H11NO3	145.074	Allysine(6-Oxo DL-Norleucine)	Amino acid and derivatives	146.1	100.1	+	0.772267	427885
91527@[M+H]+@RANK1	197565-90-5		C7H13NO3	159.09	Calystegine A7	Alkaloids	160.1	142.1	+	2.60999	426175
124@[M-H]-@RANK1	77-92-9	C00158	C6H8O7	192.027	Citric acid	Organic acids	191	111	-	3.65267	397923
36769@[M+H]+@RANK1	52761-34-9	C19827	C18H30O3	294.219	Colneleate	Fatty Acyls	295.2	123.1	+	11.9661	385142
3793@[M-H]-@RANK1	503-49-1	C03761	C6H10O5	162.053	3-Hydroxy-3-methylpentane-1,5-dioic acid	Amino acid and derivatives	161	57	-	2.32127	384400
3452@[M-H]-@RANK1	63-37-6	C00055	C9H14N3O8P	323.052	Cytidine 5'-monophosphate (Cytidylic acid)	Nucleotide and its derivates	322	79	-	0.69215	379242
74@[M+H]+@RANK1	50-67-9	C00780	C10H12N2O	176.095	Serotonin	Tryptamine derivatives	177.1	160.1	+	2.61237	378005
89151@[M+H]+@RANK1	100667-52-5		C19H20O2	280.146	7-(4-Hydroxyphenyl)-1-phenyl-4-hepten-3-one	Phenols	281.2	105.1	+	12.5318	377452
STD_368-16-1@+@RANK1	368-16-1	C01152	C7H11N3O2	169.085	3-Methy-L-histidine	amino acids	170.1	96.1	+	0.61	375514
91@[M+H]+@RANK1	951-78-0	C00526	C9H12N2O5	228.075	2'-Deoxyuridine;Deoxyuridine	Nucleotide and its derivates	229.1	113	+	2.66873	374248
369@[M+H]+@RANK1	126-49-8	C00254	C10H10O6	226.048	Prephenate	Keto acids and derivatives	227.1	163	+	2.24243	363924
379@[M+NA]+@RANK1	59-56-3	C00103	C6H13O9P	260.03	Glucose 1-phosphate	Organooxygen compounds	283	121	+	12.9983	361049
73241@[M+H]+@RANK1	53798-73-5	C19578	C9H11NO2	165.079	5-(3-Pyridyl)-2-hydroxytetrahydrofuran	Pyridines and derivatives	166.1	104	+	2.803	345410
62391@[M+H]+@RANK1	3233-58-7;104-15-4	C06677	C7H8O4S	188.014	p-Toluenesulfonic acid	Organic acids	189	91.1	+	11.2448	339956
45856@[M+H]+@RANK1	473-81-4	C00258	C3H6O4	106.027	Glyceric acid	Organooxygen compounds	107	89	+	0.554083	338272
44874@[M+H]+@RANK1	529-69-1	C03975	C6H5N5O2	179.044	Isoxanthopterin	Pteridines and derivatives	180.1	135	+	3.25613	335741
3788@[M+H-H2O]+@RANK1	28822-73-3;3343-19-9	C05576	C8H10O4	170.058	3,4-Dihydroxyphenylglycol	Phenols	153.1	107	+	3.08328	334046
128@[M+H]+@RANK1	108-95-2	C00146	C6H6O	94.0419	Phenol	Phenols	95	77	+	2.09197	332372
63216@[M+H]+@RANK1	3416-24-8	C00329	C6H13NO5	179.079	Glucosamine	Carbohydrates	180.1	162.1	+	2.6016	331378
43815@[M+H]+@RANK1	62-59-9		C32H49NO9	591.341	Cevadine	Alkaloids	592.3	574.3	+	13.279	327994
STD_7724-76-7@+@RANK1	7724-76-7		C15H21N5O4	335.159	N6-isopentenyladenosine	phytohormone	336	204	+	6.1	320493
36155@[M+H]+@RANK1	35121-78-9	C01312	C20H32O5	352.225	Prostaglandin I2	Fatty Acyls	353.2	317.2	+	9.38948	309352
68049@[M+H]+@RANK1	18058-50-9	C09962	C10H11NO3	193.074	Gentioflavin	Alkaloids	194.1	148.1	+	4.93442	306473
86940@[M+H]+@RANK1	55610-02-1		C19H15NO4	321.1	Cepharadione B	Alkaloids	322.1	236.1	+	11.3623	304896
94811@[M+H]+@RANK1	103-41-3		C16H14O2	238.099	Benzyl cinnamate	Phenylpropanoids	239.1	91.1	+	4.55317	304708
3413@[M+H]+@RANK1	528-58-5	C05905	C15H10O6	286.048	Cyanidin	Flavonoids	287.1	137	+	5.89814	300836
3305@[M+H]+@RANK1	19246-18-5	C01419	C5H10N2O3S	178.041	CYS-GLY;Cysteinylglycine	Amino acid and derivatives	179	76	+	1.38275	299937
58297@[M+H]+@RANK1	525-72-4;27740-96-1	C09642	C10H13NO2	179.095	Salsolinol	Tetrahydroisoquinolines	180.1	163.1	+	2.26593	298735
18@[M-H]-@RANK1	56-85-9	C00064	C5H10N2O3	146.069	L-Glutamine	Amino acid and derivatives	145.1	42	-	0.64	291486
24111@[M+H]+@RANK1	94-07-5	C04548	C9H13NO2	167.095	Synephrine	Alkaloids	168.1	150.1	+	2.62783	281762
62815@[M+H]+@RANK1		C05548	C8H13NO4	187.084	2-Keto-6-acetamidocaproate	Keto acids and derivatives	188.1	100.1	+	1.47715	277386
972@[M+H]+@RANK1	5707-55-1	C04043	C8H8O3	152.047	3,4-Dihydroxyphenylacetaldehyde	Benzene and substituted derivatives	153.1	135	+	4.0537	276642
43491@[M-H]-@RANK1	103-84-4	C07565	C8H9NO	135.068	N-Acetylarylamine	Benzene and substituted derivatives	134.1	92.1	-	2.24652	276416
45931@[M+NA]+@RANK1	97-67-6	C00149	C4H6O5	134.022	L-Malic acid	Hydroxy acids and derivatives	157	110.1	+	1.37645	274870
STD_56-12-2@+@RANK1	56-12-2	C00334	C4H9NO2	103.063	4-Aminobutyric acid	amino acids	104.1	87.1	+	0.66	274339
61979@[M+H]+@RANK1	132-13-8	C05775	C14H18N2O4	278.127	N1-(alpha-D-ribosyl)-5,6-dimethyl-benzimidazole	Benzimidazole ribonucleosides and ribonucleotides	279.1	147.1	+	11.8825	274089
41091@[M+H]+@RANK1	99-87-6	C06575	C10H14	134.11	p-Cymene	Monoterpenoids	135.1	93.1	+	11.6207	272909
89713@[M+H]+@RANK1	27503-33-9		C28H30O9	510.189	Physalin C	Steroids	511.2	493.2	+	3.12187	272509
58590@[M+H]+@RANK1		C06006	C6H10O4	146.058	(S)-2-Aceto-2-hydroxybutanoate	Keto acids and derivatives	147.1	57	+	0.66155	267801
47251@[M+H]+@RANK1;47252@[M+H]+@RANK1	2545-00-8	C09320;C12128	C15H14O5	274.084	(+)-Afzelechin;(-)-Epiafzelechin	Flavonoids	275.1	139	+	1.09113	267693
129@[M+H]+@RANK1;65599@[M+H]+@RANK1;66606@[M+H]+@RANK1	103-82-2;99-94-5;99-04-7	C07086;C01454;C07211	C8H8O2	136.052	Phenylacetic acid;4-Methylbenzoic acid;M-toluic Acid	Benzene and substituted derivatives	137.1	91.1	+	7.2276	267196
166@[M+H-H2O]+@RANK1	80-99-9	C01189	C27H46O	386.355	Lathosterol	Steroids and steroid derivatives	369.4	95.1	+	11.8025	257635
143@[M-H]-@RANK1	50-70-4	C00794	C6H14O6	182.079	D-Sorbitol	Alcohols and polyols	181.1	59	-	0.71855	252617
4237@[M+H]+@RANK1	500-98-1	C05598	C10H11NO3	193.074	Phenylacetylglycine	Amino acid and derivatives	194.1	91.1	+	4.91812	250773
6217@[M+H]+@RANK1	90-05-1	C15572;C01502	C7H8O2	124.052	Guaiacol	Phenols	125.1	65	+	5.62252	250373
3402@[M+H]+@RANK1	25515-46-2	C06561	C15H12O5	272.068	Naringenin chalcone	Flavonoids	273.1	153	+	6.54065	248705
53458@[M+H]+@RANK1	3569-10-6	C09743	C15H22O2	234.162	Valerenic acid	Sesquiterpenoids	235.2	161.1	+	11.2448	248385
68350@[M+H]+@RANK1	3843-74-1	C10477	C10H10O4	194.058	Methyl caffeate acid	Phenylpropanoids	195.1	121	+	4.59625	247694
317@[M+H]+@RANK1	118-92-3	C00108	C7H7NO2	137.048	Anthranilic acid	Benzoic acid derivatives	138.1	120	+	2.87835	246079
48471@[M+H]+@RANK1	2196-14-7	C12123	C15H10O4	254.058	4',7-Dihydroxyflavone	Flavonoids	255.1	213.1	+	7.68682	239368
44613@[M+H]+@RANK1	119-68-6	C03005	C8H9NO2	151.063	2-(Methylamino)benzoic acid	Benzene and substituted derivatives	152.1	134.1	+	1.5816	238906
3449@[M+H]+@RANK1	72059-45-1	C00909	C20H30O3	318.219	Leukotriene A4	Fatty Acyls	319.2	301.2	+	5.56518	238149
7055@[M+H]+@RANK1	539-15-1	C06199	C10H15NO	165.115	Hordenine	Alkaloids	166.1	121.1	+	3.03795	236228
STD_332-80-9@+@RANK1	332-80-9	C01152	C7H11N3O2	169.085	1-Methy-L-histidine	amino acids	170.1	124	+	0.61	235277
62397@[M+H]+@RANK1		C15497	C11H16N2O5	256.106	1-(beta-D-Ribofuranosyl)-1,4-dihydronicotinamide	Organooxygen compounds	257.1	108	+	2.803	234169
66848@[M+H]+@RANK1	60-31-1	C08201	C7H16ClNO2	181.087	Acetylcholine chloride	Alkaloids	182.1	122.1	+	3.30648	233368
68217@[M+H]+@RANK1	69065-16-3	C10283	C19H20O4	312.136	4'-Prenyloxyresveratrol	Phenols	313.1	55.1	+	11.849	232939
93470@[M+H]+@RANK1	52438-21-8		C13H15NO	201.115	1-Cinnamoylpyrrolidine	Alkaloids	202.1	72.1	+	7.06585	227104
68002@[M+H]+@RANK1	524-03-8	C09910	C10H13N	147.105	(S)-Actinidine	Pyridines and derivatives	148.1	132.1	+	2.803	220952
68121@[M+H]+@RANK1	20716-98-7	C10087	C14H10O5	258.053	Norlichexanthone	Xanthones	259.1	241.1	+	4.48128	217859
49457@[M+H]+@RANK1	6980-25-2	C10187	C22H22O11	462.116	Swertiajaponin	Flavonoids	463.1	445.1	+	13.8629	217038
3555@[M+H]+@RANK1	112-86-7	C08316	C22H42O2	338.318	Erucic acid	Fatty Acyls	339.3	57.1	+	13.279	216462
9@[M+H]+@RANK1	352-97-6	C00581	C3H7N3O2	117.054	Guanidineacetic acid	Amino acid and derivatives	118.1	43	+	1.10792	216050
69522@[M+H]+@RANK1	86-87-3	C13014	C12H10O2	186.068	1-Naphthylacetic acid	Phytohormones	187.1	141.1	+	10.5509	212266
3477@[M+H]+@RANK1	3687-64-7	C01235	C12H22O11	342.116	Galactinol	Organooxygen compounds	343.1	181.1	+	2.78972	212033
2302@[M+H]+@RANK1	146-14-5	C00016	C27H33N9O15P2	785.157	Flavin adenine dinucleotide (FAD)	Nucleotide and its derivates	786.2	348.1	+	4.0818	210324
532@[M+H]+@RANK1	63968-64-9	C09538	C15H22O5	282.147	Artemisinin	Sesquiterpenoids	283.2	110.1	+	13.0238	208722
145@[M-H]-@RANK1	56-73-5	C00092	C6H13O9P	260.03	D-Glucose 6-phosphate;Glucose 6-phosphate	Carbohydrates	259	97	-	0.6463	208548
STD_480-18-2@+@RANK1	480-18-2	C01617	C15H12O7	304.058	Taxifolin	flavonoids	304.8	286.8	+	6.28	205536
2820@[M+H]+@RANK1	1076-22-8	C16357	C6H6N4O2	166.049	3-Methylxanthine	Nucleotide and its derivates	167.1	42	+	2.71022	202574
68314@[M+H]+@RANK1	87340-27-0	C10410	C18H25NO5	335.173	Triangularine	Alkaloids	336.2	55.1	+	11.7232	199204
STD_22059-21-8@+@RANK1	22059-21-8		C4H7NO2	101.048	1-Aminocyclopropanecarboxylic acid	phytohormone	102	56	+	0.7	198271
5882@[M+H]+@RANK1	6402-36-4	C16308	C12H20O4	228.136	Traumatic acid	Fatty Acyls	229.1	81.1	+	8.38543	198103
71962@[M+H]+@RANK1	10376-48-4	C17966	C30H50O	426.386	Shionone	Triterpenoids	427.4	409.4	+	12	196331
318@[M-H]-@RANK1	65-86-1	C00295	C5H4N2O4	156.017	Orotic acid	Vitamins	155	111	-	1.26458	194700
58318@[M+H]+@RANK1	4478-93-7		C6H11NOS2	177.028	Sulforaphane	Miscellaneous	178	72	+	0.66155	194555
91109@[M+H]+@RANK1	60047-17-8		C10H18O2	170.131	2-(2-Hydroxy-2-propyl)-5-methyl-5-vinyltetrahydrofuran	Monoterpenoids	171.1	55.1	+	5.47147	190709
64176@[M+H]+@RANK1	2041-35-2	C05619	C10H10O5	210.053	3-(3,4-Dihydroxy-5-methoxy)-2-propenoic acid	Cinnamic acids and derivatives	211.1	193	+	4.10028	190613
43808@[M+H]+@RANK1	531-59-9	C09268	C10H8O3	176.047	Herniarin	Coumarins	177.1	121.1	+	7.69052	190177
71904@[M+H]+@RANK1	61854-36-2	C17786	C15H10O6	286.048	Demethoxycapillarisin	Flavonoids	287.1	269	+	6.51202	189911
63109@[M+NA]+@RANK1	102916-66-5	C00673	C5H11O7P	214.024	2-Deoxyribose 5'-phosphate	Carbohydrates	237	81	+	11.1273	188739
64426@[M+H]+@RANK1	135-97-7	C02066	C8H15NO	141.115	Pseudotropine	Alkaloids	142.1	124.1	+	0.805833	185648
STD_77026-92-7@-@RANK1	77026-92-7	C08491	C12H18O3	210.126	(±)-Jasmonic acid	phytohormone	209	59	-	8.94	185635
187@[M+H]+@RANK1	57-10-3	C00249	C16H32O2	256.24	Palmitic acid	Lipids	257.2	57.1	+	12.9167	182890
67738@[M+H]+@RANK1	470-17-7	C09484	C15H20O2	232.146	Isoalantolactone	Sesquiterpenoids	233.2	105.1	+	12.3094	181852
48321@[M+H]+@RANK1	18642-23-4	C10523	C20H16O5	336.1	Psoralidin	Coumarins	337.1	55.1	+	11.7986	181287
4197@[M-H]-@RANK1	87-69-4	C00898	C4H6O6	150.016	Tartaric acid	Miscellaneous	149	43	-	0.869633	179259
236@[M+H]+@RANK1	529-96-4	C00647	C8H13N2O5P	248.056	Pyridoxamine 5'-phosphate	Pyridines and derivatives	249.1	134.1	+	3.5104	179190
58075@[M+H]+@RANK1	552-62-5	C16353	C6H6N4O2	166.049	7-Methylxanthine	Nucleotide and its derivates	167.1	124	+	2.6016	177364
43294@[M+H]+@RANK1	76-41-5	C08019	C17H19NO4	301.131	Oxymorphone	Phenanthrenes and derivatives	302.1	284.1	+	11.1842	177070
49971@[M+H]+@RANK1	2034-65-3	C10037	C15H10O5	270.053	Resokaempferol	Flavonoids	271.1	105	+	8.79448	175952
599@[M+H]+@RANK1	14769-73-4	C07070	C11H12N2S	204.072	Levamisole	Imidazothiazoles	205.1	91.1	+	12.0358	173140
63108@[M+H]+@RANK1	458-36-6	C02666	C10H10O3	178.063	Coniferylaldehyde	Phenylpropanoids	179.1	91.1	+	6.78053	166608
225@[M+H]+@RANK1	59-02-9	C02477	C29H50O2	430.381	alpha-Tocopherol	Phenols	431.4	165.1	+	13.3658	165850
3843@[M+H]+@RANK1	79551-86-3	C14748	C20H32O3	320.235	20-HETE	Fatty Acyls	321.2	91.1	+	13.279	162565
353@[M-H]-@RANK1	90-80-2	C00198	C6H10O6	178.048	Gluconolactone	Carbohydrates	177	59	-	0.675	159280
67890@[M+H]+@RANK1	85-33-6	C09696	C15H14O	210.104	Lactaroviolin	Prenol lipids	211.1	193.1	+	10.5063	159123
44529@[M+H]+@RANK1	897-06-3	C20144	C19H24O2	284.178	Boldione	Steroids and steroid derivatives	285.2	121.1	+	9.0665	153167
64934@[M+H]+@RANK1	5699-54-7	C02486	C6H13NO2	131.095	Beta-Leucine	Carboxylic acids and derivatives	132.1	72.1	+	1.79602	153010
43986@[M+H]+@RANK1	500-44-7	C04771	C8H10N2O4	198.064	Mimosine	Alkaloids	199.1	124	+	2.36582	151705
58454@[M+H]+@RANK1	3393-18-8	C06196	C10H13N4O7P	332.052	2'-Deoxyinosine-5'-monophosphate	Nucleotide and its derivates	333.1	137	+	1.91802	151311
95841@[M+H]+@RANK1	178764-92-6		C12H18N2O	206.142	Agrocybenine	Alkaloids	207.1	55.1	+	5.03133	151296
3595@[M+H]+@RANK1	20762-30-5	C00301	C15H23N5O14P2	559.072	Adenosine diphosphate ribose	Purine nucleotides	560.1	136.1	+	3.9593	150689
67114@[M+H]+@RANK1	26166-37-0	C08680	C22H33NO2	343.251	Denudatine	Alkaloids	344.3	326.2	+	1.58737	148393
71850@[M+H]+@RANK1	67979-25-3	C17670	C17H14O7	330.074	Aurantio-obtusin	Anthraquinones	331.1	313.1	+	10.2799	148259
90984@[M+H]+@RANK1	104700-97-2		C30H46O2	438.35	Ganoderol A	Triterpenoids	439.4	421.3	+	11.3119	147497
91248@[M+H]+@RANK1;91249@[M+H]+@RANK1	7786-67-6;89-79-2		C10H18O	154.136	Isopulegol	Monoterpenoids	155.1	137.1	+	2.46032	146078
7009@[M+H]+@RANK1	3131-52-0	C05578	C8H7NO2	149.048	5,6-Dihydroxyindole	Indoles and derivatives	150.1	78	+	6.67983	145552
44509@[M+H]+@RANK1	118-71-8	C11918	C6H6O3	126.032	Maltol	Flavonoids	127	43	+	0.8987	145509
95433@[M+H]+@RANK1	80514-14-3		C26H38O5	430.272	7beta-(3-Ethyl-cis-crotonoyloxy)-1alpha-(2-methylbutyryloxy)-3,14-dehydro-Z-notonipetranone	Sesquiterpenoids	431.3	55.1	+	13.8674	145049
67595@[M+H]+@RANK1	120-08-1	C09311	C11H10O4	206.058	Scoparone	Coumarins	207.1	121	+	5.05917	143918
71253@[M+H]+@RANK1		C16596	C10H9NO3	191.058	5-Phenyl-1,3-oxazinane-2,4-dione	Benzene and substituted derivatives	192.1	103.1	+	2.803	141822
41806@[M+H]+@RANK1	126-17-0	C10822	C27H43NO2	413.329	Solasodine	Alkaloids	414.3	396.3	+	11.8389	139016
65561@[M+H]+@RANK1	87-66-1	C01108	C6H6O3	126.032	Pyrogallol;1,2,3-Trihydroxybenzene	Phenols	127	81	+	3.52465	138371
68299@[M+H]+@RANK1	480-81-9	C10391	C18H23NO5	333.158	Seneciphylline	Alkaloids	334.2	316.2	+	9.06	137995
64950@[M+H]+@RANK1	874-24-8	C18620	C6H5NO3	139.027	3-Hydroxypicolinic acid	Pyridines and derivatives	140	94	+	4.14562	132538
67049@[M+H]+@RANK1	29477-83-6	C08533	C14H13NO7	307.069	Narciclasine	Alkaloids	308.1	216	+	4.11682	131538
90@[M+H]+@RANK1	58-96-8	C00299	C9H12N2O6	244.07	Uridine	Nucleotide and its derivates	245.1	113	+	2.46733	131375
230@[M+H]+@RANK1	148-03-8	C14152	C28H48O2	416.365	Beta-Tocopherol	Phenols	417.4	151.1	+	12.0702	131146
36293@[M+H]+@RANK1		C04822	C20H32O4	336.23	8(R)-HPETE		337.2	149.1	+	11.5794	131100
3910@[M+H]+@RANK1	11032-49-8		C41H56O2	580.428	vitamin K2	Vitamins	581.4	563.4	+	5.05602	130841
64350@[M+H]+@RANK1	604-99-9	C11635	C19H22N2O	294.173	Tombozine	Alkaloids	295.2	277.2	+	8.30778	129870
STD_1637-39-4@+@RANK1	1637-39-4	C00371	C10H13N5O	219.112	trans-Zeatin	phytohormone	220	136	+	3.41	129555
147@[M-H]-@RANK1	488-69-7	C00354	C6H14O12P2	339.996	Fructose 1,6-bisphosphate	Organooxygen compounds	339	97	-	0.7554	129223
63310@[M+H]+@RANK1	1449-09-8	C08830	C31H52O	440.402	24-Methylenecycloartan-3-ol	Triterpenoids	441.4	83.1	+	11.4462	127662
65497@[M-H]-@RANK1	10323-20-3	C00216	C5H10O5	150.053	D-Arabinose	Miscellaneous	149	59	-	0.747958	126182
313@[M-H]-@RANK1	50-69-1	C00121	C5H10O5	150.053	D-Ribose	Carbohydrates	149	59	-	0.7736	126182
98@[M-H]-@RANK1	85-32-5	C00144	C10H14N5O8P	363.058	Guanosine 5'-monophosphate	Nucleotide and its derivates	362.1	79	-	2.76512	125962
63531@[M+H]+@RANK1		C11588	C9H12O4	184.074	cis-3-(Carboxy-ethyl)-3,5-cyclo-hexadiene-1,2-diol		185.1	167.1	+	4.8505	124902
71525@[M+H]+@RANK1	26121-56-2	C17050	C21H28O6	376.189	Picrasin B	Diterpenoids	377.2	359.2	+	4.4645	124714
STD_482-35-9@+@RANK1	482-35-9	C05623	C21H20O12	464.096	Isoquercitrin	flavonoids	465.4	302.8	+	6.06	123864
64244@[M+H]+@RANK1;64941@[M+H]+@RANK1	6906-38-3;50986-17-9;482-35-9	C12138	C21H20O12	464.095	Delphinidin-3-O-glucoside;Isoquercitrin	Flavonoids	465.1	303.1	+	6.06382	123864
163@[M+H-H2O]+@RANK1	57-88-5	C00187	C27H46O	386.355	Cholesterol	Steroids and steroid derivatives	369.4	147.1	+	11.8597	123313
7089@[M+H]+@RANK1	471-87-4	C10172	C7H13NO2	143.095	Proline betaine	Carboxylic acids and derivatives	144.1	41	+	0.7387	122436
3251@[M+NA]+@RANK1	98-79-3	C01879	C5H7NO3	129.043	5-oxoproline	Amino acid and derivatives	152	69	+	0.560733	121576
66219@[M+H]+@RANK1		C04592	C7H10O2	126.068	Toluene-cis-dihydrodiol		127.1	39	+	1.77923	121037
367@[M-H]-@RANK1	53411-70-4	C00345	C6H13O10P	276.025	6-Phosphogluconic acid	Organooxygen compounds	275	97	-	1.04252	120954
4167@[M+H]+@RANK1	1094-61-7	C00455	C11H15N2O8P	334.057	beta-Nicotinamide mononucleotide	Nucleotide and its derivates	335.1	123.1	+	0.729483	119616
43786@[M+H]+@RANK1	606-91-7		C17H16O4	284.105	Homopterocarpin	Flavonoids	285.1	107	+	9.07443	119602
63232@[M+H]+@RANK1	35061-50-8	C01674	C16H28N2O11	424.169	N,N'-diacetylchitobiose	Organooxygen compounds	425.2	204.1	+	0.7655	119382
3686@[M+H]+@RANK1	6450-77-7	C00857	C21H26N6O15P2	664.093	Nicotinic acid adenine dinucleotide	Nucleotide and its derivates	665.1	136.1	+	6.9108	118695
91172@[M+H]+@RANK1	98665-19-1		C32H44O9	572.299	Ganoderic acid H	Triterpenoids	573.3	555.3	+	11.7315	118221
44699@[M+H]+@RANK1	1194-98-5	C05585	C7H6O3	138.032	2,5-Dihydroxybenzaldehyde	Phenols	139	65	+	5.08547	117372
20@[M+H]+@RANK1;STD_56-40-6@+@RANK1	56-40-6	C00037	C2H5NO2	75.032028999999994;75.031999999999996	Glycine	Alkaloids;amino acids	76	30	+	0.62	117262
94742@[M+H]+@RANK1	123-66-0		C8H16O2	144.115	Ethyl caproate	Miscellaneous	145.1	57.1	+	0.7377	115735
44123@[M-H]-@RANK1	3094-09-5	C12739	C9H11FN2O5	246.065	5'-Deoxy-5-fluorouridine	5'-deoxyribonucleosides	245.1	42	-	1.88283	115730
68131@[M+H]+@RANK1	76472-87-2	C10100	C45H44O11	760.288	Kuwanon H	Flavonoids	761.3	743.3	+	12.0358	113938
69413@[M+H]+@RANK1	79-77-6	C12287	C13H20O	192.151	beta-Ionone	Prenol lipids	193.2	55.1	+	11.228	113446
4137@[M-H]-@RANK1	2041-14-7	C03557	C2H8NO3P	125.024	2-Aminoethylphosphonate	Miscellaneous	124	79	-	1.21002	112032
3283@[M+H]+@RANK1	494-52-0;13078-04-1	C06180;C11357	C10H14N2	162.116	Anabasine	Alkaloids	163.1	118.1	+	2.8737	110477
67953@[M+H]+@RANK1		C09816	C11H12O4	208.074	DL-Benzylsuccinic acid	Phenylpropanoids	209.1	117.1	+	4.9512	108362
58397@[M+H]+@RANK1	28047-15-6	C04148	C13H16N2O4	264.111	Phenylacetyl-L-glutamine	Amino acid and derivatives	265.1	91.1	+	4.71198	106386
64362@[M+H]+@RANK1	6451-73-6	C02106	C19H21NO4	327.147	Scoulerine	Alkaloids	328.2	268.1	+	5.77357	105465
14@[M+H]+@RANK1;STD_70-47-3@+@RANK1	70-47-3	C00152	C4H8N2O3	132.053493;132.05350000000001	L-Asparagine	Amino acid and derivatives;amino acids	133.1	74	+	0.64	105194
63360@[M+H]+@RANK1	85551-10-6	C01226	C18H28O3	292.204	12-OPDA		293.2	275.2	+	11.3958	102926
34477@[M+H]+@RANK1	545-47-1	C08628	C30H50O	426.386	Lupeol	Triterpenoids	427.4	109.1	+	11.9033	102806
3254@[M-H]-@RANK1	110-94-1	C00489	C5H8O4	132.042	Glutaric acid	Organic acids and derivatives	131	87	-	14.0664	102467
3395@[M-H]-@RANK1	961-07-9	C00330	C10H13N5O4	267.097	Deoxyguanosine	Nucleotide and its derivates	266.1	150	-	2.72425	102036
592@[M+H]+@RANK1	18883-66-4	C07313	C8H15N3O7	265.091	Streptozotocin	Organooxygen compounds	266.1	140.1	+	0.71665	101914
71332@[M+H]+@RANK1	22567-36-8	C16773	C15H26O2	238.193	Bisabolol oxide A	Sesquiterpenoids	239.2	55.1	+	11.4953	101653
44573@[M+H]+@RANK1	1563-66-2	C14291	C12H15NO3	221.105	Carbofuran	Coumarans	222.1	123	+	4.02562	100911
2476@[M+H]+@RANK1	1695-77-8	C02078	C14H24N2O7	332.158	Spectinomycin	Dioxanes	333.2	98.1	+	2.23747	100425
6987@[M+H]+@RANK1	107-36-8	C05123	C2H6O4S	125.999	2-Hydroxyethanesulfonate	Organic acids	127	109	+	0.755483	100202
310@[M+H]+@RANK1	621-82-9	C10438	C9H8O2	148.052	Cinnamic acid	Cinnamic acids and derivatives	149.1	103.1	+	8.61644	99874.1
71681@[M+H]+@RANK1	728-61-0	C17425	C15H16O3	244.11	Linderalactone	Sesquiterpenoids	245.1	199.1	+	8.73737	99474.7
565@[M+H]+@RANK1	95058-81-4	C07650	C9H11F2N3O4	263.072	Gemcitabine	Pyrimidine nucleosides	264.1	112.1	+	0.745467	98803.3
85151@[M+H]+@RANK1	587-63-3		C14H16O3	232.11	Dihydrokavain	Phenols	233.1	117.1	+	10.4224	98583.6
94837@[M+H]+@RANK1	118024-26-3		C16H14O6	302.079	Blumeatin	Flavonoids	303.1	123	+	5.18742	98372.8
64032@[M+H]+@RANK1	6730-83-2	C11874	C20H30O2	302.225	Kaurenoic acid	Diterpenoids	303.2	257.2	+	5.90232	98320.6
64945@[M-H]-@RANK1	452-86-8	C06730	C7H8O2	124.052	4-Methylcatechol	Phenols	123	122	-	4.47608	96682.8
44683@[M+H]+@RANK1	6673-35-4	C11696	C14H22N2O3	266.163	Practolol	Benzene and substituted derivatives	267.2	56.1	+	2.73587	96520.4
3598@[M-H]-@RANK1;3599@[M-H]-@RANK1	133-89-1;2956-16-3	C00029;C00052	C15H24N2O17P2	566.055	Uridine 5'-diphospho-D-glucose;UDP-D-galactose;Uridine diphosphategalactose	Nucleotide and its derivates;Pyrimidine nucleotides	565	323	-	0.709633	96349.7
69025@[M+H]+@RANK1	498-02-2	C11380	C9H10O3	166.063	Acetovanillone	Phenols	167.1	43	+	5.23652	95959.6
44659@[M+H]+@RANK1	642-38-6	C08257	C7H14O6	194.079	L-Quebrachitol	Miscellaneous	195.1	177.1	+	4.59133	95886.6
44875@[M+H]+@RANK1	83-33-0	C01504	C9H8O	132.058	1-Indanone;Indanone	Indanes	133.1	105.1	+	12.3021	95812.6
36461@[M+H]+@RANK1	557-61-9	C08387	C28H58O	410.449	1-Octacosanol	Miscellaneous	411.5	393.4	+	13.2026	95184.5
44436@[M+H]+@RANK1	478-01-3	C10112	C21H22O8	402.131	Nobiletin	Flavonoids	403.1	373.1	+	11.03	95133
41274@[M+NA]+@RANK1	11141-17-6	C08748;C11047	C35H44O16	720.263	Azadirachtin	Triterpenoids	743.3	725.2	+	11.3171	94907.9
67178@[M+H]+@RANK1;67436@[M+H]+@RANK1	23062-24-0;30220-46-3	C08759;C09112	C19H24O6;C20H28O5	348.15728999999999;348.19367499999998	Eurycomalactone;Ingenol	Diterpenoids	349.2	331.2	+	5.79035	93854.6
362@[M+H]+@RANK1	1492-23-5	C01118	C8H13NO6	219.074	O-Succinyl-L-homoserine		220.1	102.1	+	2.28037	90960.9
41086@[M+H]+@RANK1	123-35-3	C06074	C10H16	136.125	Myrcene	Monoterpenoids	137.1	53	+	11.7375	90086.7
48904@[M+H]+@RANK1;48940@[M+H]+@RANK1	4261-42-1;28608-75-5	C01821;C10114	C21H20O11	448.101	Luteolin-6-C-glucoside;Orientin	Flavonoids	449.1	431.1	+	5.55513	89739.8
3472@[M+H]+@RANK1	70968-82-0	C05356	C20H32O4	336.23	5(S)-HPETE	Fatty Acyls	337.2	189.2	+	11.5794	89720.1
43635@[M+H]+@RANK1	487-26-3	C02099	C15H12O2	224.084	2,3-Dihydro-2-phenyl-4H-benzopyran-4-one	Flavonoids	225.1	121	+	4.92873	89654.3
87060@[M+H]+@RANK1	78281-02-4		C27H32O16	612.169	Hydroxysafflor yellow A	Chalcones	613.2	595.2	+	12.5874	89314.5
41883@[M+H]+@RANK1	516-54-1	C13712	C21H34O2	318.256	Allopregnanolone	Steroids and steroid derivatives	319.3	301.3	+	11.5799	89048.4
15@[M+H]+@RANK1;STD_56-84-8@+@RANK1	56-84-8	C00049	C4H7NO4	133.037509;133.03749999999999	L-Aspartic acid	Amino acid and derivatives;amino acids	134	74	+	0.63	88200.5
34494@[M+H]+@RANK1	124-26-5	C13846	C18H37NO	283.288	Octadecanamide	Fatty Acyls	284.3	43.1	+	13.0209	87784.6
68205@[M+H]+@RANK1	480-47-7	C10262	C15H12O4	256.074	Hydrangenol	Flavonoids	257.1	105	+	11.3119	87008.2
68273@[M+H]+@RANK1	72213-98-0	C10357	C22H33NO8	439.221	Parsonsine	Alkaloids	440.2	422.2	+	10.9427	86048.2
58004@[M+H]+@RANK1	481-29-8	C07635	C19H30O2	290.225	Epiandrosterone	Steroids and steroid derivatives	291.2	273.2	+	11.614	85787.3
7013@[M+H]+@RANK1	2208-41-5	C05643	C13H16N2O3	248.116	6-Hydroxymelatonin	Tryptamine derivatives	249.1	190.1	+	5.75678	85756.7
328@[M-H]-@RANK1	156-06-9	C00166	C9H8O3	164.047	Phenylpyruvic acid	Benzene and substituted derivatives	163	91.1	-	5.66713	85167.4
58032@[M+H]+@RANK1	1157-60-4	C01168	C9H13N2O9P	324.036	Pseudouridine 5'-phosphate	Organooxygen compounds	325	99	+	1.15827	84799.5
41191@[M+H]+@RANK1	29307-03-7	C09388	C19H20O6	344.126	Deoxyelephantopin	Sesquiterpenoids	345.1	69	+	2.66337	84788.9
63097@[M+H]+@RANK1	1783-96-6	C00402	C4H7NO4	133.038	D-Aspartic acid	Alkaloids	134	74	+	0.755483	84757.1
168@[M+H-H2O]+@RANK1	83-48-7	C05442	C29H48O	412.371	Stigmasterol	Steroids and steroid derivatives	395.4	83.1	+	13.121	84219.3
STD_153-18-4@+@RANK1	153-18-4	C05625	C27H30O16	610.153	Rutin	flavonoids	611	465	+	5.85	83889.4
89628@[M+H]+@RANK1	1058-61-3		C29H48O	412.371	Sitostenone	Steroids and steroid derivatives	413.4	109.1	+	13.7064	83533.4
93893@[M+H]+@RANK1	7437-55-0		C21H22O4	338.152	8-Geranyloxypsoralen	Coumarins	339.2	55.1	+	13.2923	83264.3
64256@[M+H]+@RANK1	17334-58-6	C08725	C27H30O15	594.158	Pelargonidin-3,5-O-diglucoside chloride	Flavonoids	595.2	271.1	+	5.67087	83206.4
68654@[M+H]+@RANK1	77394-27-5	C10884	C23H26O8	430.163	Sesartemin	Lignans	431.2	169.1	+	11.9036	82876.6
6951@[M+NA]+@RANK1	10094-58-3;470-55-3	C01613	C24H42O21	666.222	Stachyose	Organooxygen compounds	689.2	527.2	+	0.727683	82150.8
64178@[M+H]+@RANK1	249647-14-1	C12204	C10H10O4	194.058	5-Hydroxyconiferaldehyde		195.1	177.1	+	4.61278	81858
66386@[M+H]+@RANK1	103-36-6	C06359	C11H12O2	176.084	Ethyl cinnamate	Phenylpropanoids	177.1	131	+	4.8505	81572.5
73386@[M+H]+@RANK1	465-02-1	C19833	C30H50O	426.386	Germanicol	Triterpenoids	427.4	409.4	+	12.631	81359.6
53798@[M+H]+@RANK1	1615-94-7	C17901	C30H50O	426.386	Simiarenol	Triterpenoids	427.4	409.4	+	12.6546	81359.6
68627@[M+H]+@RANK1	537-26-8	C10848	C15H19NO2	245.142	Tropacocaine	Alkaloids	246.1	105	+	8.72735	79815.5
89861@[M+H]+@RANK1;93687@[M+H]+@RANK1	113146-74-0;120849-18-5		C28H32O10	528.2	Physalin L;Physalin O	Steroids and steroid derivatives	529.2	511.2	+	12.386	79807.5
58595@[M+H]+@RANK1		C05350	C9H8O4	180.042	2-Hydroxy-3-(4-hydroxyphenyl)propenoic acid	Benzene and substituted derivatives	181	105	+	10.0462	79773.1
169@[M+H-H2O]+@RANK1	83-46-5	C01753	C29H50O	414.386	Beta-Sitosterol;beta-Sitosterol	Steroids and steroid derivatives	397.4	147.1	+	12.93	79531.4
281@[M+H]+@RANK1	300-84-5	C00519	C2H7NO2S	109.02	Hypotaurine	Alkaloids	110	65	+	2.24245	79529.8
44276@[M+H]+@RANK1;STD_525-79-1@+@RANK1	525-79-1	C08272	C10H9N5O	215.08071000000001;215.08070000000001	6-(Furfurylamino)purine;Kinetin	Alkaloids;phytohormone	216.05	81	+	4.55	79093.5
60@[M+H]+@RANK1	51-67-2	C00483	C8H11NO	137.084	Tyramine	Amino acid and derivatives	138.1	121.1	+	3.25613	79073.1
86561@[M-H]-@RANK1	147-71-7	C02107	C4H6O6	150.016	D-tartaric acid;D-Tartaric acid	Organic acids and derivatives	149	73	-	0.869633	78887.3
68331@[M+H]+@RANK1	2305-13-7	C10448	C10H14O3	182.094	Dihydroconiferyl alcohol	Phenylpropanoids	183.1	165.1	+	7.9889	78852.2
53412@[M+H]+@RANK1	546-43-0	C09289	C15H20O2	232.146	Alantolactone	Sesquiterpenoids	233.2	105.1	+	11.9329	77973.7
41868@[M+H]+@RANK1	50-22-6	C02140	C21H30O4	346.214	Corticosterone	Steroids and steroid derivatives	347.2	329.2	+	6.11073	77526.2
87897@[M+H]+@RANK1	60125-23-7		C9H8O2	148.052	3-(2-Hydroxyphenyl)-2-propenal	Phenylpropanoids	149.1	131	+	6.66932	77471.4
43510@[M+H]+@RANK1	6753-98-6	C09684	C15H24	204.188	Alpha-caryophyllene	Sesquiterpenoids	205.2	81.1	+	11.581	76731.3
103@[M+H]+@RANK1	513-86-0;53584-56-8	C00810;C00466	C4H8O2	88.0524	(R)-Acetoin	Miscellaneous	89.1	71	+	0.5281	76577.2
95004@[M+H]+@RANK1	25166-14-7		C25H20O10	480.106	2,3-Dehydrosilybin A	Flavonoids	481.1	463.1	+	5.53108	76566.4
44228@[M-H]-@RANK1	6136-37-4	C16358	C6H6N4O2	166.049	1-Methylxanthine	Nucleotide and its derivates	165	108	-	3.75582	76225.8
58024@[M+H]+@RANK1	1068-84-4	C00872	C3H5NO4	119.022	Aminomalonic acid	Organic acids	120	74	+	0.654783	75665.9
3280@[M+H]+@RANK1	111-16-0	C02656	C7H12O4	160.074	Pimelic acid	Fatty Acyls	161.1	69.1	+	0.551617	75622.4
1455@[M+H]+@RANK1	58-08-2	C07481	C8H10N4O2	194.08	Caffeine	Alkaloids	195.1	138.1	+	4.50223	73944.6
7@[M-H]-@RANK1	57-00-1	C00300	C4H9N3O2	131.069	Creatine	Organic acids	130.1	88	-	1.14837	72944.5
1458@[M+H]+@RANK1	58-55-9	C07130	C7H8N4O2	180.065	Theophylline	Alkaloids	181.1	124	+	3.92347	72922.4
71578@[M+H]+@RANK1	16844-71-6	C17123	C30H52O	428.402	Epifriedelanol	Triterpenoids	429.4	411.4	+	12.2853	72859.8
36025@[M-H]-@RANK1	111004-08-1	C16321	C18H30O4	310.214	9(S)-HPOT	Fatty acyls	309.2	121.1	-	11.1331	72793.1
64312@[M+H]+@RANK1	61135-91-9	C04271	C15H12O4	256.074	3,9-Dihydroxypterocarpan	Flavonoids	257.1	95	+	9.65042	72587.1
63311@[M+H]+@RANK1	469-39-6	C02141	C30H50O	426.386	Cycloeucalenol	Triterpenoids	427.4	83.1	+	11.8993	72208.8
68255@[M+H]+@RANK1	478-40-0	C10335	C11H8O4	204.042	Droserone	Quinones	205	187	+	12.1175	71441.5
67775@[M+H]+@RANK1	76045-49-3	C09524	C20H24O3	312.173	Broussonin C	Phenols	313.2	55.1	+	13.2252	71107.7
STD_39924-52-2@+@RANK1	39924-52-2	C11512	C13H20O3	224.141	Methyl jasmonate	phytohormone	225	151	+	11.3	70893.2
67081@[M+H]+@RANK1	471-69-2	C08622	C30H50O2	442.381	Dipterocarpol	Triterpenoids	443.4	425.4	+	12.0524	70308.4
44061@[M+H]+@RANK1	481-39-0	C03840	C10H6O3	174.032	Juglone	Quinones	175	147	+	8.74153	68935.5
43918@[M+H]+@RANK1	143-57-7	C10815	C41H63NO14	793.425	Protoveratrine A	Alkaloids	794.4	776.4	+	11.7295	68883.8
68312@[M+H]+@RANK1;68313@[M+H]+@RANK1	74410-74-5;22571-95-5	C10408;C10409	C20H31NO6	381.215	Symlandine;Symphytine	Alkaloids	382.2	55.1	+	13.007	68191
92351@[M+H]+@RANK1	33579-63-4		C27H30O15	594.158	Chrysoeriol 7-apiosylglucoside	Flavonoids	595.2	283.1	+	5.32043	67914.8
86409@[M+H]+@RANK1;86522@[M+H]+@RANK1	121-32-4;118-61-6		C9H10O3	166.063	3-Ethoxy-4-hydroxybenzaldehyde;Ethyl salicylate	Phenols	167.1	121	+	5.71545	67638.5
48673@[M+H]+@RANK1	51938-32-0	C10181	C26H28O14	564.148	Schaftoside	Flavonoids	565.2	547.1	+	5.38755	66983.4
92039@[M+H]+@RANK1	473-08-5	C17090	C15H22O	218.167	alpha-Cyperone	Sesquiterpenoids	219.2	67.1	+	12.2018	66499.5
91173@[M+H]+@RANK1	98665-15-7		C32H42O9	570.283	Ganoderic acid F	Triterpenoids	571.3	553.3	+	12.9734	66346.2
62461@[M+H]+@RANK1	1466-50-8	C05283	C10H17N3O6	275.112	N2-gamma-Glutamylglutamine	Carboxylic acids and derivatives	276.1	213.1	+	2.41698	65379.6
68599@[M+H]+@RANK1	469-59-0	C10811	C27H39NO3	425.293	Jervine	Alkaloids	426.3	408.3	+	10.5231	65124.1
68348@[M+H]+@RANK1	1963-36-6	C10475	C10H10O2	162.068	4-Methoxycinnamaldehyde	Phenylpropanoids	163.1	145.1	+	6.79732	64762.4
89164@[M+H]+@RANK1	69120-06-5		C19H18O4	310.121	Moracin C	Phenols	311.1	55.1	+	13.9867	64663.6
91587@[M+H]+@RANK1	20013-75-6		C15H16O	212.12	Pyrocurzerenone	Sesquiterpenoids	213.1	171.1	+	3.42397	64623.5
51395@[M+H]+@RANK1	90-18-6	C10122	C15H10O8	318.038	Quercetagetin	Flavonoids	319	109	+	11.5805	64496.2
STD_18829-70-4@+@RANK1	18829-70-4	C06562	C15H14O6	290.079	Cianidanol	flavonoids	290.9	165	+	4.5	64349.5
44858@[M+H]+@RANK1	112-39-0	C16995	C17H34O2	270.256	Methyl hexadecanoic acid	Fatty Acyls	271.3	57.1	+	9.78468	64019.8
68652@[M+H]+@RANK1	58546-56-8	C10881	C30H32O9	536.205	Schisantherin A	Lignans	537.2	105	+	12.2549	63635.9
91247@[M+H]+@RANK1	99026-99-0		C26H30O10	502.184	Limonexic acid	Triterpenoids	503.2	485.2	+	12.5539	63051.6
67182@[M+H]+@RANK1	1259-86-5	C08763	C25H34O10	494.215	(+)-Glaucarubinone	Diterpenoids	495.2	477.2	+	5.79035	62813.6
65590@[M+H]+@RANK1	119-53-9	C01408	C14H12O2	212.084	Benzoin	Stilbenes	213.1	105	+	4.6659	62370.6
48621@[M+H]+@RANK1	520-28-5	C11621	C16H12O4	268.074	Tectochrysin	Flavonoids	269.1	251.1	+	9.87735	62054.3
69786@[M+H]+@RANK1	824-42-0	C14087	C8H8O2	136.052	3-Methylsalicylaldehyde		137.1	119	+	10.5567	61516.1
63506@[M+H]+@RANK1;68507@[M+H]+@RANK1	7339-87-9;99-93-4	C03765;C10700	C8H8O2	136.052	4-Hydroxyphenylacetaldehyde;4'-Hydroxyacetophenone	Benzene and substituted derivatives;Phenols	137.1	119	+	10.5735	61516.1
6937@[M+H]+@RANK1	923-16-0	C00993	C6H12N2O3	160.085	D-Alanyl-D-Alanine	Amino acid and derivatives	161.1	44.1	+	4.33023	61412.9
86325@[M+H]+@RANK1	85532-77-0		C27H30O15	594.158	Safflor Yellow A	Chalcones	595.2	577.2	+	12.3357	61301.7
4140@[M+H]+@RANK1	964-26-1	C00365	C9H13N2O8P	308.041	dUMP	Pyrimidine nucleotides	309	113	+	0.760367	61197.3
87212@[M+H]+@RANK1	19013-07-1		C13H14O2	202.099	Demethoxyencecalin	Phenols	203.1	119	+	11.7986	60634
43728@[M+H]+@RANK1;68041@[M+H]+@RANK1	532-48-9;3785-24-8	C09954	C13H12O3	216.079	Euparin;Nepodin	Phenols	217.1	173.1	+	8.7416	60576.7
STD_3681-93-4@+@RANK1	3681-93-4	C01460	C21H20O10	432.106	Vitexin	flavonoids	433.4	414.9	+	5.92	60570.6
89525@[M+H]+@RANK1	23027-91-0		C28H30O10	526.184	Physalin A	Steroids and steroid derivatives	527.2	509.2	+	12.1007	60317.9
89860@[M+H]+@RANK1	76045-38-0		C28H30O10	526.184	Physalin G	Steroids and steroid derivatives	527.2	509.2	+	12.1678	60317.9
71484@[M+H]+@RANK1	4431-01-0	C16987	C12H14O2	190.099	Ligustilide	Miscellaneous	191.1	67.1	+	2.803	60147.9
3473@[M+H]+@RANK1	480-78-4	C10363	C18H27NO5	337.189	Platyphylline	Alkaloids	338.2	320.2	+	9.28118	59454.6
3554@[M+H]+@RANK1	5561-99-9	C16526	C20H38O2	310.287	cis-Gondoic acid	Lipids	311.3	57.1	+	13.4027	58892.5
68630@[M+H]+@RANK1	521-67-5	C10852	C19H23NO4	329.163	Cinnamoylcocaine	Alkaloids	330.2	103.1	+	11.5637	58663.5
71531@[M+H]+@RANK1;91189@[M+H]+@RANK1	62394-04-1;465-39-4	C17058	C20H32O7;C24H32O4	384.21480500000001;384.23005999999998	Cinnzeylanol;Resibufogenin	Diterpenoids;Steroids	385.2	367.2	+	6.83088	58301.1
STD_107-95-9@+@RANK1	107-95-9	C00099	C3H7NO2	89.0477	beta-Alanine	amino acids	90.1	72.1	+	0.64	57980.7
67340@[M+H]+@RANK1	37921-38-3	C09000	C16H18O6	306.11	Cimifugin	Flavonoids	307.1	289.1	+	4.14562	57836.4
67801@[M+H]+@RANK1	19202-92-7	C09557	C17H22O5	306.147	Tenulin	Sesquiterpenoids	307.2	289.1	+	4.22953	57836.4
68305@[M+H]+@RANK1	573-40-0	C10399	C19H30O4	322.214	Rapanone	Quinones	323.2	43.1	+	12.8224	57614.3
71741@[M+H]+@RANK1		C17501	C15H22O	218.167	Cyperotundone	Prenol lipids	219.2	147.1	+	11.1273	57505.5
48216@[M+H]+@RANK1	69393-95-9	C01263	C15H12O5	272.068	Glycinol	Flavonoids	273.1	95	+	6.54558	57289.4
67197@[M+H]+@RANK1	992-20-1	C08780	C34H44O9	596.299	Salannin	Triterpenoids	597.3	147.1	+	5.97497	56763.5
1380@[M+H]+@RANK1	25614-03-3	C06856	C32H40BrN5O5	653.221	Bromocriptine	Ergoline and derivatives	654.2	636.2	+	12.0352	56575.1
326@[M-H]-@RANK1	67-07-2	C02305	C4H10N3O5P	211.036	Creatine Phosphate	Organic acids	210	79	-	0.682667	56170.9
67944@[M+H]+@RANK1	17388-39-5	C09800	C16H22O10	374.121	Swertiamarin	Iridoids	375.1	195.1	+	4.82248	56049.8
410@[M-H]-@RANK1	74465-19-3	C01220	C6H14O12P2	339.996	1D-Myo-inositol 1,4-bisphosphate	Organooxygen compounds	339	79	-	0.7554	55879.6
47452@[M+H]+@RANK1	99624-28-9	C09760	C25H30O4	394.214	Kazinol A	Flavonoids	395.2	123	+	13.2587	55842.2
70306@[M+H]+@RANK1	26538-44-3	C14752	C18H26O5	322.178	Zeranol	Macrolides and analogues	323.2	305.2	+	11.849	55786.6
67580@[M+H]+@RANK1	5230-87-5	C09294	C15H20O8	328.116	Anisatin	Sesquiterpenoids	329.1	311.1	+	5.42288	55594.7
64052@[M+H]+@RANK1	27741-01-1	C11673	C16H22O10	374.121	Geniposidic acid;Geniposidic acid	Iridoids;Terpene	375.1	339.1	+	3.6969	55474.1
64203@[M+H]+@RANK1	548-82-3	C09826	C15H12O5	272.068	Pinobanksin	Flavonoids	273.1	91.1	+	8.13995	55329.4
68615@[M+H]+@RANK1	533-31-3	C10832	C7H6O3	138.032	Sesamol	Phenols	139	111	+	3.34005	55062.7
87119@[M+H]+@RANK1	1241-87-8		C16H18O9	354.095	1-Caffeoylquinic acid	Phenylpropanoids	355.1	121	+	4.63233	54962.7
3322@[M+H]+@RANK1	4707-58-8	C01092	C9H17NO3	187.121	8-Amino-7-oxononanoic acid	Alkaloids	188.1	109.1	+	1.51007	54894.5
87074@[M+H]+@RANK1	517-88-4	C10292	C16H16O5	288.1	Shikonin	Quinones	289.1	271.1	+	5.13582	54767
41104@[M+H]+@RANK1	494-90-6	C09868	C10H14O	150.104	(R)-Menthofuran	Prenol lipids	151.1	55.1	+	5.14695	54676.3
3585@[M+NA]+@RANK1	1109-28-0	C01835	C18H32O16	504.169	Maltotriose	Organooxygen compounds	527.2	365.1	+	1.22643	54461.7
3457@[M+H]+@RANK1	6217-54-5	C06429	C22H32O2	328.24	Docosahexaenoic acid	Fatty Acyls	329.2	93.1	+	12.6025	54122.8
6383@[M+H]+@RANK1	621-44-3		C9H10N2O5	226.059	3-Nitro-L-tyrosine	Miscellaneous	227.1	181.1	+	8.72735	53544.1
89800@[M+H]+@RANK1	623-17-6		C7H8O3	140.047	Furfuryl acetate	Miscellaneous	141.1	81	+	5.47147	53487.1
64430@[M+H]+@RANK1	7143-09-1	C12448	C10H17NO3	199.121	Methylecgonine	Alkaloids	200.1	182.1	+	3.13865	52932.1
68574@[M+H]+@RANK1	529-78-2	C10781	C15H20N2O	244.158	Rhombifoline	Alkaloids	245.2	55.1	+	8.74413	52667.8
67731@[M+H]+@RANK1	38458-58-1	C09475	C22H28O8	420.178	Eucannabinolide	Sesquiterpenoids	421.2	361.2	+	11.5729	52552.6
322@[M-H]-@RANK1	3184-35-8	C00322	C6H8O5	160.037	Oxoadipic acid	Organic acids	159	59	-	1.64643	52538.7
43861@[M+H]+@RANK1	485-35-8	C10763	C11H14N2O	190.111	Cytisine	Alkaloids	191.1	44.1	+	1.21823	52403.4
274@[M+H]+@RANK1	3106-60-3	C02918	C7H8N2O	136.064	3-Carbamyl-1-methylpyridinium (1-Methylnicotinamide)	Pyridines and derivatives	137.1	94.1	+	6.35912	52400.5
68532@[M+H]+@RANK1	568-53-6	C10729	C21H20O8	400.116	alpha-Peltatin	Lignans	401.1	165.1	+	12.5874	51860.8
43921@[M+H]+@RANK1	4845-99-2;357-57-3	C09084	C23H26N2O4	394.189	Brucine	Alkaloids	395.2	244.1	+	4.37663	51827.7
88081@[M+H]+@RANK1	68776-47-6		C15H20O3	248.141	1beta-Hydroxyalantolactone	Sesquiterpenoids	249.1	231.1	+	5.25755	51475
73566@[M+H-H2O]+@RANK1	473-98-3	C08618	C30H50O2	442.381	Betulin	Triterpenoids	425.4	95.1	+	12.3169	51355
67556@[M+H]+@RANK1	125-15-5	C09255	C22H24N2O4	380.174	Vomicine	Alkaloids	381.2	363.2	+	5.37078	51238.5
STD_480-10-4@+@RANK1	480-10-4	C12249	C21H20O11	448.101	Astragalin	flavonoids	449	286.9	+	6.52	51164
67359@[M+H]+@RANK1	2912-11-0	C09022	C20H24N2O	308.189	(+)-Affinisine	Alkaloids	309.2	291.2	+	8.5763	50514.9
68012@[M+H]+@RANK1	76948-72-6	C09922	C20H18O8	386.1	Cleomiscosin A	Coumarins	387.1	137.1	+	5.74	50500.8
61647@[M+H]+@RANK1;61666@[M+H]+@RANK1	19237-53-7	C03033	C13H14O8;C14H18O7	298.06887;298.105255	Benzoyl glucuronide (Benzoic acid);2-Phenylethanol glucuronide	Organooxygen compounds	299.1	105.05	+	12.0671	50436.1
66897@[M+H]+@RANK1	87-52-5	C08304	C11H14N2	174.116	Gramine	Alkaloids	175.1	130.1	+	8.72735	50426.8
144@[M-H]-@RANK1	87-9-8;87-89-8	C00137	C6H12O6	180.063	myo-Inositol	Organooxygen compounds	179.1	87	-	0.718517	49883.5
44694@[M+NA]+@RANK1	470-69-9	C03661	C18H32O16	504.169	1-Kestose	Organooxygen compounds	527.2	203.1	+	0.738167	49466.1
STD_4261-42-1@+@RANK1	4261-42-1	C01821	C21H20O11	448.101	Homoorientin	flavonoids	449	430.9	+	5.43	49277.1
306@[M+H]+@RANK1	583-17-5;614-60-8	C01772	C9H8O3	164.047	2-Hydroxycinnamic acid	Phenylpropanoids	165.1	103.1	+	5.44248	49133.4
6661@[M-H]-@RANK1	45848-87-1	C14088	C8H8O3	152.047	3-Cresotinic acid	Benzene and substituted derivatives	151	107.1	-	7.75183	48718.3
3237@[M-H]-@RANK1	141-82-2	C00383	C3H4O4	104.011	Malonic acid	Carboxylic acids and derivatives	103	59	-	1.02818	48499.6
64734@[M+H]+@RANK1	78473-71-9	C18165	C18H18O4	298.121	Enterolactone	Lignans	299.1	107	+	12.0651	48469.3
67924@[M+H]+@RANK1	11027-63-7	C09765	C22H26O11	466.148	Agnuside	Iridoids	467.2	121	+	12.3692	48418.8
90235@[M+H]+@RANK1	205115-73-7		C21H20O5	352.131	Lansiumarin A	Coumarins	353.1	69	+	11.6476	48187.6
5089@[M+H]+@RANK1	64-85-7	C03205	C21H30O3	330.219	Deoxycorticosterone	Steroids and steroid derivatives	331.2	97.1	+	9.60557	48131.3
65361@[M-H]-@RANK1	135-19-3	C11713	C10H8O	144.058	2-Naphthol	Naphthalenes	143.1	115.1	-	10.2295	48014.8
90306@[M+H]+@RANK1	6786-16-9		C30H48O	424.371	Taraxasterone	Triterpenoids	425.4	407.4	+	13.8461	47722.7
338@[M-H]-@RANK1	138-59-0	C00493	C7H10O5	174.053	Shikimic acid	Organic acids and derivatives	173	93	-	1.09505	47659.6
43230@[M+H]+@RANK1	154-21-2	C06812	C18H34N2O6S	406.214	Lincomycin	Carboxylic acids and derivatives	407.2	126.1	+	12.4381	47653
41814@[M+H]+@RANK1	50-27-1	C05141	C18H24O3	288.173	Estriol	Steroids	289.2	253.2	+	5.7834	47125
41249@[M+H]+@RANK1	17673-25-5	C09155	C20H28O6	364.189	Phorbol	Diterpenoids	365.2	329.2	+	11.9127	47076.3
67933@[M+H]+@RANK1	24512-63-8	C09781	C17H24O10	388.137	Geniposide	Iridoids	389.1	209.1	+	5.14213	46972.4
3327@[M+H]+@RANK1	10534-44-8	C00944	C7H10O6	190.048	3-Dehydroquinate	Alcohols and polyols	191.1	145.1	+	10.5637	46882.6
956@[M+H]+@RANK1	5080-50-2	C02571	C9H17NO4	203.116	L-Acetylcarnitine	Fatty Acyls	204.1	85	+	0.6922	46715.9
64384@[M+H]+@RANK1	2141-09-5	C09581	C20H23NO4	341.163	Magnoflorine	Alkaloids	342.2	269.1	+	6.54558	46627.3
3361@[M+H]+@RANK1	39924-52-2;1211-29-6	C11512	C13H20O3	224.141	Methyl jasmonate	Fatty Acyls	225.1	133.1	+	11.3	46550
67127@[M+H]+@RANK1	39089-30-0	C08693	C22H35NO4	377.257	Karacoline	Alkaloids	378.3	342.2	+	5.20795	46181.2
58223@[M+H]+@RANK1	3947-38-4	C05795	C33H40N4O6	588.295	D-Urobilin	Tetrapyrroles and derivatives	589.3	553.3	+	11.5233	46050.3
71541@[M]+@RANK1	562-74-3	C17073	C10H18O	154.136	Terpinine-4-ol	Monoterpenoids	154.1	43	+	5.45468	45905
82@[M-H]-@RANK1	69-89-6	C00385	C5H4N4O2	152.033	Xanthine	Nucleotide and its derivates	151	108	-	1.03212	45900.2
2982@[M+H-H2O]+@RANK1	128-13-2	C07880	C24H40O4	392.293	Ursodeoxycholic acid	Steroids	375.3	357.3	+	11.4727	45679.3
63624@[M+H]+@RANK1	554-35-8	C01594	C10H17NO6	247.106	Linamarin	Organooxygen compounds	248.1	68	+	0.705133	45677
49592@[M+H]+@RANK1	1168-42-9	C14472	C19H18O6	342.11	4',5,6,7-Tetramethoxyflavone;5,6,7-trimethoxy-2-(4-methoxyphenyl)chromen-4-one	Flavonoids	343.1	107	+	11.6644	45195.9
89872@[M+H]+@RANK1	54980-22-2		C28H32O11	544.194	Physalin D	Steroids and steroid derivatives	545.2	527.2	+	12.1007	44765.3
46@[M+H]+@RANK1	1190-49-4	C02427	C7H15N3O3	189.111	L-Homocitrulline	Amino acid and derivatives	190.1	101.1	+	0.721917	44588
68661@[M+H]+@RANK1	34209-69-3	C10891	C21H24O7	388.152	Trachelogenin	Lignans	389.2	137.1	+	5.00155	44457.4
44806@[M+H]+@RANK1	4206-58-0	C05610	C11H12O4	208.074	trans-3,5-Dimethoxy-4-hydroxy cinnamaldehydee	Phenylpropanoids	209.1	55	+	5.16938	44391.2
61662@[M+H]+@RANK1	115075-59-7	C03033	C19H26O8	382.163	1-(alpha-Methyl-4-(2-methylpropyl)benzeneacetate)-beta-D-Glucopyranuronic acid	Organooxygen compounds	383.2	189.1	+	12.1846	44125.5
68616@[M+H]+@RANK1	17365-11-6	C10834	C14H16O10	344.074	3-Galloylquinic acid	Phenols	345.1	153	+	2.90368	43940.2
5727@[M+H]+@RANK1	869-19-2	C02155	C8H16N2O3	188.116	N-Glycyl-L-leucine	Amino acid and derivatives	189.1	30	+	1.44358	43851
87907@[M+H]+@RANK1	101-86-0		C15H20O	216.151	alpha-Hexylcinnamaldehyde	Phenols	217.2	91.1	+	8.70532	43576.9
36247@[M+NA]+@RANK1	80434-82-8	C05950	C20H30O6	366.204	20-COOH-Leukotriene B4	Fatty Acyls	389.2	371.2	+	11.567	43080.1
65904@[M+H]+@RANK1	90-33-5	C03081	C10H8O3	176.047	4-Methylumbelliferone	Coumarins	177.1	149.1	+	7.25831	43075.1
67623@[M+H]+@RANK1	19906-72-0	C09350	C15H22O2	234.162	Bakkenolide A	Miscellaneous	235.2	149.1	+	11.849	42977.8
68384@[M+H]+@RANK1	29106-36-3	C10561	C22H26O6	386.173	Pinoresinol dimethyl ether	Lignans	387.2	121.1	+	5.1526	42937.6
68667@[M+H]+@RANK1	10605-21-7	C10897	C9H9N3O2	191.069	Carbendazim	Benzimidazoles	192.1	160.1	+	4.09528	42844.9
73003@[M+H]+@RANK1	930-55-2	C19285	C4H8N2O	100.064	N-Nitroso-pyrrolidine	Pyrrolidines	101.1	30	+	3.10833	42810.1
3373@[M+H]+@RANK1	1022-31-7	C02700	C11H12N2O4	236.08	N'-Formylkynurenine	Amino acid and derivatives	237.1	163.1	+	9.5123	42651.3
3978@[M-H]-@RANK1	81-13-0	C05944	C9H19NO4	205.131	Pantothenol	Alcohols and polyols	204.1	71.1	-	1.46755	42632.9
3474@[M+H]+@RANK1	3031-94-5	C04677	C9H15N4O8P	338.063	AICAR	Imidazole ribonucleosides and ribonucleotides	339.1	110	+	13.279	42597.4
91090@[M+H]+@RANK1	102607-24-9		C30H46O8	534.319	Ganoderic acid L	Alkaloids	535.3	499.3	+	5.82392	42563.1
64101@[M+H]+@RANK1	87-44-5	C09629	C15H24	204.188	trans-Caryophyllene	Sesquiterpenoids	205.2	95.1	+	12.1185	42302.6
67355@[M+H]+@RANK1	644-06-4	C09018	C13H16O3	220.11	Precocene II	Phenols	221.1	165.1	+	10.6967	40768.6
68397@[M+H]+@RANK1	28178-92-9	C10574	C21H22O5	354.147	Futoquinol	Lignans	355.2	41	+	11.4241	40558.5
67808@[M+H]+@RANK1	24164-13-4	C09566	C17H22O4	290.152	Epitulipinolide	Sesquiterpenoids	291.2	231.1	+	5.06868	40259.8
90625@[M+H]+@RANK1	110241-19-5		C30H42O8	530.288	Ganoderic acid N	Triterpenoids	531.3	495.3	+	12.5979	40117.5
52314@[M+H]+@RANK1	35241-55-5	C09644	C16H16O4	272.105	2',6'-Dihydroxy 4'-methoxydihydrochalcone	Chalcones	273.1	105.1	+	10.716	40064.9
64183@[M+H]+@RANK1	18696-26-9	C00933	C16H23NO5	309.158	Sinapine	Cholines	310.2	165.1	+	5.0757	39997.7
89919@[M+H]+@RANK1	32911-62-9		C28H38O6	470.267	Withanolide A	Steroids and steroid derivatives	471.3	453.3	+	12.2685	39861.1
49089@[M+H]+@RANK1	25694-72-8	C12630	C27H30O15	594.158	Lonicerin	Flavonoids	595.2	269	+	6.08417	39806.1
93472@[M+H]+@RANK1	28360-49-8		C23H25NO2	347.189	Mahanine	Alkaloids	348.2	222.1	+	2.1164	39413
41670@[M+H]+@RANK1	18444-66-1	C08797	C32H44O8	556.304	Cucurbitacin E	Triterpenoids	557.3	497.3	+	11.9302	39401
73578@[M+H]+@RANK1	122-46-3		C9H10O2	150.068	Acetic acid m-cresyl ester	Phenols	151.1	109.1	+	7.27852	39331.9
STD_73692-50-9@+@RANK1	73692-50-9	C06561	C15H12O5	272.068	Chalconaringenin	flavonoids	272.9	152.9	+	8.78	38941.6
92736@[M+H]+@RANK1	2061-64-5		C28H44O3	428.329	Ergosterol peroxide	Steroids and steroid derivatives	429.3	85.1	+	13.4924	38876.7
44078@[M-H]-@RANK1	939-19-5		C9H6O3	162.032	3-Hydroxycoumarin	Coumarins	161	133	-	5.2651	38832.2
58314@[M-H]-@RANK1	10597-60-1		C8H10O3	154.063	2-(3,4-Dihydroxyphenyl)ethanol	Phenols	153.1	123	-	6.36813	38709.5
92568@[M+H]+@RANK1	55033-90-4		C28H32O16	624.169	Isorhamnetin-3-O-neohespeidoside	Flavonoids	625.2	317.1	+	6.11252	38547.9
95343@[M+H]+@RANK1	30273-62-2		C12H16O4	224.105	3,4,5-Trimethoxycinnamyl alcohol	Phenylpropanoids	225.1	207.1	+	10.4046	38259.4
3456@[M+H]+@RANK1	4360-12-7	C06542	C20H26N2O2	326.199	Ajmaline	Alkaloids	327.2	144.1	+	11.9126	38088.5
93485@[M+H]+@RANK1	101140-06-1		C30H18O10	538.09	3,8'-Biapigenin	Flavonoids	539.1	521.1	+	11.9161	37916.1
47516@[M+H]+@RANK1	19202-36-9	C10057	C30H18O10	538.09	Hinokiflavone	Flavonoids	539.1	521.1	+	11.9329	37916.1
64380@[M+H]+@RANK1	5096-70-8	C05243	C18H21NO3	299.152	N-Methylcoclaurine	Alkaloids	300.2	107	+	12.0671	37901.3
68315@[M+H]+@RANK1	80151-77-5	C10411	C10H17NO3	199.121	Tussilagine	Alkaloids	200.1	182.1	+	3.8523	37772
8@[M-H]-@RANK1	60-27-5	C00791	C4H7N3O	113.059	Creatinine	Organic acids	112.1	41	-	1.44538	37203.9
61676@[M+H]+@RANK1;61677@[M+H]+@RANK1	77463-72-0;77463-71-9	C03033	C15H17NO8	339.095	6-Hydroxy-5-methoxyindole glucuronide;5-Hydroxy-6-methoxyindole glucuronide	Organooxygen compounds	340.1	164.1	+	5.13582	37145
246@[M+H]+@RANK1	59-30-3	C00504	C19H19N7O6	441.14	Folic acid	Alkaloids	442.1	295.1	+	3.96033	36484
2256@[M+H]+@RANK1	530-57-4	C10833	C9H10O5	198.053	Syringic acid	Phenols	199.1	140	+	3.5697	36171.7
4100@[M-H]-@RANK1	100-02-7	C00870	C6H5NO3	139.027	4-Nitrophenol	Phenols	138	108	-	7.18527	36086.2
68651@[M+H]+@RANK1	493-95-8	C10880	C20H16O6	352.095	Savinin	Lignans	353.1	161.1	+	11.1105	36006.9
3428@[M+H]+@RANK1	16105-69-4	C02934	C18H37NO2	299.282	3-Dehydrosphinganine	Organooxygen compounds	300.3	56.1	+	12.0702	35847.5
53771@[M+H]+@RANK1	26020-14-4	C08964	C36H56O9	632.392	Calenduloside E	Triterpenoids	633.4	439.4	+	12.5539	35694.9
65903@[M+H]+@RANK1		C03080	C9H10O3	166.063	4-Hydroxyphenyl-2-propionic acid	Phenylpropanoic acids	167.1	121.1	+	10.0868	35686.6
70060@[M+H]+@RANK1	149-30-4	C14437	C7H5NS2	166.986	2(3H)-Benzothiazolethione	Benzothiazoles	168	124	+	2.56803	35646.8
71957@[M+H]+@RANK1;91738@[M+H]+@RANK1	22338-69-8;471-80-7	C17956;C20212	C20H30O3	318.219	Grandifloric acid;Steviol	Diterpenoids	319.2	255.2	+	6.47845	35484.7
64241@[M+H]+@RANK1	68795-37-9	C12141	C22H22O11	462.116	Peonidin-3-glucoside	Flavonoids	463.1	301.1	+	6.92733	35422.9
3463@[M+H]+@RANK1	57-24-9	C06522	C21H22N2O2	334.168	Strychnine	Alkaloids	335.2	184.1	+	3.674	35372.2
48138@[M+H]+@RANK1	2035-15-6	C10502	C16H12O5	284.068	(-)-Maackiain	Flavonoids	285.1	95	+	8.47562	35358.1
3415@[M+H]+@RANK1	552-58-9	C05631	C15H12O6	288.063	Eriodictyol	Flavonoids	289.1	137	+	8.04894	35343
93381@[M+H]+@RANK1	13405-60-2		C13H16O10	332.074	beta-Glucogallin	Phenols	333.1	153	+	2.41698	35321.2
STD_27200-12-0@+@RANK1	27200-12-0	C02906	C15H12O8	320.053	Dihydromyricetin	flavonoids	320.9	302.8	+	5.27	35273.4
62807@[M+H]+@RANK1	90-15-3	C11714	C10H8O	144.058	1-Naphthol	Naphthalenes	145.1	127.1	+	8.73574	35201.8
68206@[M+H]+@RANK1;68308@[M+H]+@RANK1	17958-43-9;551-58-6	C10263;C10403	C15H25NO4	283.178	Amabiline;Supinine	Alkaloids	284.2	122.1	+	12.9902	34956.7
STD_5373-11-5@+@RANK1	5373-11-5		C21H20O11	448.101	Cynaroside	flavonoids	449	286.9	+	6.1	34944.4
42805@[M+H]+@RANK1		C11637	C24H38O4	390.277	3alpha,12alpha-Dihydroxy-5beta-chol-6-enoate		391.3	355.3	+	11.5843	34905.9
86092@[M+H]+@RANK1	22688-79-5		C21H18O13	478.075	Quercetin-3-O-glucuronide	Flavonoids	479.1	303.1	+	5.92462	34675.6
1936@[M+H]+@RANK1	92-13-7	C07474	C11H16N2O2	208.121	Pilocarpine	Alkaloids	209.1	95.1	+	5.03792	34565.5
36476@[M+H]+@RANK1	81203-57-8	C17447	C17H24O	244.183	Panaxynol	Miscellaneous	245.2	57	+	12.5661	34564.1
2041@[M+H]+@RANK1	40505-27-9	C10553	C21H20O8	400.116	4'-Demethylpodophyllotoxin	Lignans	401.1	383.1	+	6.42917	34518.3
58552@[M+H]+@RANK1		C05841	C11H13NO6	255.074	Nicotinate ribonucleoside	Nicotinic acid derivatives	256.1	124	+	4.54667	34486.3
68218@[M+H]+@RANK1	5096-50-4	C10284	C8H13NO3	171.09	Crotanecine	Alkaloids	172.1	154.1	+	4.19597	34448.8
STD_6025-53-2@+@RANK1	6025-53-2	C16431	C15H21N5O5	351.154	trans-Zeatin-riboside	phytohormone	352	220	+	4.31	34401
140@[M+H]+@RANK1	149-32-6	C00503	C4H10O4	122.058	Erythritol	Miscellaneous	123.1	43	+	6.16642	34338.4
3769@[M-H]-@RANK1	997-55-7	C01042	C6H9NO5	175.048	N-Acetylaspartate	Amino acid and derivatives	174	88	-	1.9347	34332.4
85349@[M+H]+@RANK1	148553-50-8		C8H17NO2	159.126	Pregabalin	Miscellaneous	160.1	55.1	+	0.68835	33852
44643@[M-H]-@RANK1	2538-87-6	C05608	C9H8O2	148.052	(E)-3-(4-Hydroxyphenyl)-2-propenal	Cinnamaldehydes	147	41	-	6.42042	33791
3274@[M-H]-@RANK1	87-99-0	C00379	C5H12O5	152.068	Xylitol;D-Xylitol	Alcohols and polyols	151.1	59	-	0.814783	33696.3
390@[M+H]+@RANK1	58-22-0	C00535	C19H28O2	288.209	Testosterone	Steroids	289.2	271.2	+	5.9835	33678.8
STD_970-73-0@+@RANK1	970-73-0	C12127	C15H14O7	306.074	Gallocatechin	flavonoids	306.9	180.9	+	3.36	33523.1
3397@[M+H]+@RANK1	520-36-5	C01477	C15H10O5	270.053	Apigenin	Flavonoids	271.1	153	+	9.05821	33458.7
3042@[M+H]+@RANK1	526-36-3	C07913	C16H24N2	244.194	Xylometazoline	Benzene and substituted derivatives	245.2	189.1	+	11.6105	33405
88535@[M+H]+@RANK1	94-13-3		C10H12O3	180.079	Propyl paraben	Phenols	181.1	43.1	+	3.25713	33057.6
64368@[M+H]+@RANK1	3423-07-2	C05176	C18H21NO3	299.152	(S)-N-Methylcoclaurine	Isoquinolines and derivatives	300.2	107	+	7.58612	32992.3
44059@[M+H]+@RANK1	94-59-7	C10490	C10H10O2	162.068	Safrole	Benzodioxoles	163.1	122	+	12.263	32963.3
67241@[M+H]+@RANK1	33279-57-1	C08881	C42H64O19	872.404	k-Strophanthoside	Steroids	873.4	837.4	+	5.16938	32887.8
68609@[M+H]+@RANK1	19121-58-5	C10824	C45H73NO16	883.493	Solasonine	Alkaloids	884.5	720.4	+	7.67746	32739.5
67721@[M+H]+@RANK1	15401-60-2	C09464	C27H35NO12	565.216	Ipecoside	Iridoids	566.2	548.2	+	12.6971	32730.7
2719@[M-H]-@RANK1	6809-52-5	C13297	C23H38O	330.292	Geranylacetone	Prenol lipids	329.3	57	-	10.5148	32727.5
45285@[M+H]+@RANK1	6902-77-8	C09780	C11H14O5	226.084	Genipin	Iridoids	227.1	149.1	+	4.8505	32614.8
64372@[M+H]+@RANK1	3621-36-1	C01795	C20H19NO4	337.131	Columbamine	Alkaloids	338.1	292.1	+	9.04623	32562.8
52551@[M+H]+@RANK1	578-86-9	C09762	C15H12O4	256.074	Liquiritigenin	Flavonoids	257.1	121	+	9.65042	32355.4
71739@[M+H]+@RANK1	88206-46-6	C17499	C21H22O5	354.147	Notopterol	Coumarins	355.2	55.1	+	11.9439	32340.4
68097@[M+H]+@RANK1	2798-25-6	C10053	C14H10O6	274.048	Bellidifolin	Xanthones	275.1	257	+	12.0504	32244.4
95661@[M+H]+@RANK1	41357-84-0		C14H10O6	274.048	1,3,6-Trihydroxy-5-methoxyxanthone	Xanthones	275.1	257	+	12.0829	32244.4
58124@[M+H]+@RANK1;89099@[M+H]+@RANK1;90694@[M+H]+@RANK1;91051@[M+H]+@RANK1	545-48-2;214351-30-1;6750-30-7;20554-95-4	C20945	C30H50O2	442.381	Erythrodiol;16alpha-Hydroxybauerenol;Arnidiol;Faradiol	Triterpenoids	443.4	407.4	+	12.102	32143.5
43968@[M+H]+@RANK1	56-25-7	C16778	C10H12O4	196.074	Cantharidin	Monoterpenoids	197.1	95.1	+	6.0265	31991.8
71369@[M+H]+@RANK1	91421-43-1	C16822	C20H17N3O4	363.122	9-Aminocamptothecin	Alkaloids	364.1	347.1	+	3.10508	31897.3
43273@[M+H]+@RANK1	7681-93-8	C08073	C33H47NO13	665.305	Pimaricin	Miscellaneous	666.3	630.3	+	11.7724	31889.3
64443@[M+H]+@RANK1	130-01-8	C06176	C18H25NO5	335.173	Senecionine	Alkaloids	336.2	120.1	+	11.7315	31659.5
43936@[M-H]-@RANK1	305-01-1	C09263	C9H6O4	178.027	ESCULETIN	Coumarins	177	89	-	4.98415	31656.2
68229@[M+H]+@RANK1	86533-36-0	C10300	C12H10O4	218.058	Aristolindiquinone	Quinones	219.1	105	+	11.1441	31605
63561@[M+H]+@RANK1		C17203	C10H12N2O	176.095	N-hydroxy tryptamine	Tryptamine derivatives	177.1	144.1	+	2.61838	31542.7
4156@[M+H]+@RANK1	1135-24-6;537-98-4	C01494	C10H10O4	194.058	Ferulic acid; Trans-Ferulic acid;trans-Ferulic acid	Phenylpropanoids	195.1	117	+	4.85895	31525.5
44531@[M+H]+@RANK1;53765@[M+H]+@RANK1	22570-53-2;14351-29-2	C19829	C30H52O2	444.397	Zeorin;Dammarenediol II	Triterpenoids	445.4	409.4	+	12.6171	30919.1
42639@[M+H]+@RANK1	83-49-8	C15517	C24H40O4	392.293	Hyodeoxycholic acid	Steroids	393.3	357.3	+	4.58327	30806.4
93212@[M+H]+@RANK1	90851-24-4		C26H44O8	484.304	Goshonoside F1	Diterpenoids	485.3	449.3	+	12.3021	30758.9
41771@[M+H-H2O]+@RANK1	481-18-5	C08840	C29H48O	412.371	alpha-Spinasterol	Steroids and steroid derivatives	395.4	83.1	+	13.3235	30616.3
65735@[M+H]+@RANK1	636-78-2	C02236	C7H6O5S	201.994	4-Sulfobenzoate		203	157	+	4.68268	30572.5
71493@[M+H]+@RANK1	4567-33-3	C17002	C12H18O2	194.131	Neocnidilide	Lactones	195.1	79.1	+	6.8141	30362
91712@[M+H]+@RANK1	17019-92-0		C30H46O4	470.34	11-Keto-beta-boswellic acid	Triterpenoids	471.3	453.3	+	9.23922	30318.9
64009@[M+H]+@RANK1	517-89-5	C17412	C16H16O5	288.1	Shikonin	Quinones	289.1	271.1	+	12.04	30306.9
3356@[M-H]-@RANK1	7512-17-6	C00140	C8H15NO6	221.09	N-Acetyl-D-glucosamine	Carbohydrates	220.1	59	-	0.954883	30056.3
70177@[M+H]+@RANK1	105-67-9	C14582	C8H10O	122.073	2,4-Dimethylphenol	Phenols	123.1	65	+	10.5567	30053.9
44022@[M+H]+@RANK1	484-12-8	C09280	C15H16O3	244.11	Osthol	Phenylpropanoids	245.1	189.1	+	12.0756	29922.4
43324@[M-H]-@RANK1	108-46-3	C01751	C6H6O2	110.037	Resorcinol	Phenols	109	41	-	4.26497	29849.9
71659@[M+H]+@RANK1;71678@[M+H]+@RANK1	118117-31-0;595-14-2	C17394;C17422	C30H48O2	440.365	Karounidiol;Soyasapogenol C	Triterpenoids	441.4	405.4	+	10.5522	29696.5
84989@[M+NA]+@RANK1	135730-55-1		C35H44O14	688.273	Taxinine M	Diterpenoids	711.3	709.3	+	5.5386	29696.3
43467@[M-H]-@RANK1	17617-45-7	C09529	C15H16O6	292.095	Picrotoxinin	Sesquiterpenoids	291.1	109	-	5.06508	29677.7
44247@[M+H]+@RANK1	436-05-5;477-60-1	C09352	C36H38N2O6	594.273	(-)-Curine	Alkaloids	595.3	298.1	+	5.04445	29673.2
81@[M+H]+@RANK1	635-65-4	C00486	C33H36N4O6	584.263	Bilirubin	Organoheterocyclic compounds	585.3	299.1	+	12.2014	29666.6
92284@[M+H]+@RANK1	81970-00-5		C33H40O20	756.211	Clovin	Flavonoids	757.2	593.1	+	5.67287	29248.1
71705@[M+H]+@RANK1;93359@[M+H]+@RANK1;95966@[M+H]+@RANK1	142698-60-0;179388-53-5;18649-93-9	C17460	C28H40O6;C30H48O4	472.28249;472.35525999999999	Macrocarpal B;Macrocarpal H;Alisol B	Sesquiterpenoids;Triterpenoids	473.333	455.333	+	10.5568	29110.9
43928@[M+H]+@RANK1	24316-19-6	C10580	C18H21NO4	315.147	Cephalotaxine	Alkaloids	316.2	229.1	+	4.93257	29021.7
64236@[M+H]+@RANK1;92426@[M+H]+@RANK1	28338-59-2;17297-56-2	C08620	C27H30O15	594.158	Cyanidin 3-rutinoside;Biorobin	Flavonoids	595.2	287.1	+	6.08417	28733.1
44452@[M+H]+@RANK1	1915-98-6		C13H8O3	212.047	2-Hydroxyxanthone	Xanthones	213.1	128.1	+	7.26903	28492.1
63346@[M+H]+@RANK1	28319-77-9	C00670	C8H20NO6P	257.103	Glycerophosphocholine	Cholines	258.1	88.1	+	12.8727	28473.8
67810@[M+H]+@RANK1	39815-40-2	C09568	C17H22O6	322.142	Epitulipinolide diepoxide	Sesquiterpenoids	323.1	263.1	+	11.8658	28255.1
44377@[M+H]+@RANK1	458-35-5;32811-40-8	C00590	C10H12O3	180.079	Coniferyl alcohol	Phenylpropanoids	181.1	149.1	+	3.27073	28250.2
71492@[M+H]+@RANK1	25406-64-8	C17000	C17H26O11	406.148	Morroniside	Iridoids	407.2	227.1	+	4.48675	28093.7
64441@[M+H]+@RANK1	526-64-7	C12440	C8H15NO	141.115	Trachelanthamidine	Alkaloids	142.1	124.1	+	2.93725	27904.9
41039@[M+H]+@RANK1	481-72-1	C10294	C15H10O5	270.053	Aloeemodin	Anthraquinones	271.1	253.1	+	8.79408	27850.8
67838@[M+H]+@RANK1	26791-73-1	C09601	C15H18O3	246.126	Xanthatin	Sesquiterpenoids	247.1	229.1	+	8.3917	27805.3
53686@[M+H]+@RANK1	16561-29-8	C05151	C36H56O8	616.398	12-O-tetradecanoylphorbol-13-acetate	Diterpenoids	617.4	581.4	+	12.4867	27686
87203@[M+H]+@RANK1	32492-74-3		C21H24O5	356.162	Myricanone	Phenols	357.2	339.2	+	10.4895	27569.4
64367@[M+H]+@RANK1	486-39-5	C06161	C17H19NO3	285.136	Coclaurine	Alkaloids	286.1	107	+	9.06302	27519.1
68100@[M+H]+@RANK1	2980-32-7	C10056	C13H8O6	260.032	Desmethylbellidifolin	Xanthones	261	243	+	9.96928	27416.6
68552@[M+H]+@RANK1	732-50-3	C10755	C15H20N2O2	260.152	Baptifoline	Alkaloids	261.2	243.1	+	9.98607	27416.6
68120@[M+H]+@RANK1	3542-72-1	C10086	C13H8O6	260.032	Norathyriol	Xanthones	261	243	+	10.0029	27416.6
67749@[M+H]+@RANK1	13476-25-0	C09495	C15H16O4	260.105	Linderane	Sesquiterpenoids	261.1	243.1	+	10.0196	27416.6
63520@[M+H]+@RANK1	59320-77-3	C18202	C10H18O2	170.131	8-Methylnonenoate	Fatty Acyls	171.1	153.1	+	2.63517	27301.9
89653@[M+H]+@RANK1	53681-67-7		C27H30O14	578.164	Daidzein-4',7-diglucoside	Flavonoids	579.2	399.1	+	5.94415	27275.4
3498@[M+H]+@RANK1	327-97-9;202650-88-2	C00852	C16H18O9	354.095	Chlorogenic acid	Phenylpropanoids	355.1	163	+	5.27318	27080.3
50281@[M+H]+@RANK1	482-38-2	C16981	C27H30O14	578.164	Kaempferitrin	Flavonoids	579.2	415.1	+	5.68965	26948.6
2795@[M+H]+@RANK1	63-05-8	C00280	C19H26O2	286.193	Androstenedione	Steroids and steroid derivatives	287.2	243.2	+	6.54725	26868
68948@[M+H]+@RANK1	6665-86-7	C11264	C15H10O3	238.063	7-Hydroxyflavone	Flavonoids	239.1	137	+	0.56235	26840.3
68629@[M+H]+@RANK1	127414-85-1	C10851	C7H13NO4	175.084	Calystegine B2	Alkaloids	176.1	158.1	+	2.95403	26834.6
67345@[M+H]+@RANK1	20628-09-5	C09005	C14H16O3	232.11	Encecalin	Phenols	233.1	177.1	+	10.5645	26827.9
86297@[M+H]+@RANK1	60767-80-8		C27H30O15	594.158	Meloside A	Flavonoids	595.2	415.1	+	4.86416	26603.1
3342@[M+H]+@RANK1	94-41-7	C01484	C15H12O	208.089	1,3-Diphenyl-2-propen-1-one;Chalcone	Flavonoids	209.1	103.1	+	8.251	26585.1
41040@[M+H]+@RANK1	53823-08-8	C10307	C27H32O14	580.179	Cascaroside A	Anthraquinones	581.2	401.1	+	5.04578	26310.7
94077@[M+H]+@RANK1	93446-18-5		C27H32O14	580.179	Glucoliquiritin	Flavonoids	581.2	401.1	+	5.06618	26310.7
2541@[M+H]+@RANK1	299-42-3	C01575	C10H15NO	165.115	Ephedrine	Benzene and substituted derivatives	166.1	148.1	+	5.07428	26239.8
69026@[M+H]+@RANK1	19145-60-9	C11381	C15H19NO2	245.142	Benzoyltropein	Alkaloids	246.1	105	+	10.4895	26228.2
591@[M+H]+@RANK1	65271-80-9	C11195	C22H28N4O6	444.201	Mitoxantrone	Anthracenes	445.2	88.1	+	3.24035	26205.8
3689@[M+H]+@RANK1	3633-59-8	C00882	C21H35N7O13P2S	687.149	Dephospho-CoA	Purine nucleotides	688.2	261.1	+	6.84988	25914.3
68288@[M+H]+@RANK1	23246-96-0	C10375	C18H23NO6	349.153	Riddelline	Alkaloids	350.2	332.1	+	13.656	25909.1
67196@[M+H]+@RANK1	33237-37-5	C08779	C26H30O9	486.189	Rutaevin	Triterpenoids	487.2	469.2	+	12.5814	25844.3
52760@[M+H]+@RANK1	68236-11-3	C09724	C25H28O5	408.194	6,8-Diprenylnaringenin	Flavonoids	409.2	69.1	+	12.621	25726.5
41021@[M-H]-@RANK1	480-56-8	C02868	C16H14O7	318.074	Lecanoric acid	Phenols	317.1	167	-	0.657067	25438.5
69159@[M+H]+@RANK1	4368-28-9	C11692	C11H17N3O8	319.102	Tetrodotoxin	Alkaloids	320.1	302.1	+	12.9782	25408.3
68543@[M+H]+@RANK1	5081-51-6	C10743	C11H12N2O2	204.09	Vasicinol	Alkaloids	205.1	187.1	+	10.5735	25352.7
68646@[M+H]+@RANK1	477-49-6	C10875	C22H20O8	412.116	Podophyllotoxinone	Lignans	413.1	395.1	+	5.42112	25227.9
3671@[M+H]+@RANK1	7542-45-2;472-61-7	C08580	C40H52O4	596.387	Astaxanthin	Miscellaneous	597.4	147.1	+	13.5589	25121.7
58167@[M+H]+@RANK1	370-98-9	C02442	C9H13NO	151.1	N-Methyltyramine	Benzene and substituted derivatives	152.1	121.1	+	2.38092	25086.4
72156@[M+H]+@RANK1		C18325	C15H22N4O3	306.169	N-Feruloyl agmatine	Phenolamides	307.2	60.1	+	4.91037	25074.7
68367@[M+H]+@RANK1	61276-17-3	C10501	C29H36O15	624.205	Verbascoside	Phenylpropanoids	625.2	137.1	+	6.14149	25000.1
STD_529-59-9@+@RANK1	529-59-9		21H20O10	432.106	Genistin	flavonoids	433.3	270.8	+	6.62	24921.9
564@[M+H]+@RANK1	55079-83-9	D02754	C21H26O3	326.188	Acitretin	Miscellaneous	327.2	131.1	+	7.47013	24879.1
595@[M+H]+@RANK1	58-05-9	C03479	C20H23N7O7	473.166	Folinic acid	Pteridines and derivatives	474.2	327.1	+	5.93538	24857.9
STD_32771-64-5@+@RANK1	32771-64-5	C15545	C10H13N5O	219.112	cis-Zeatin	phytohormone	220	136	+	3.6	24809.8
604@[M+H]+@RANK1	88495-63-0		C19H28O8	384.178	Artesunate	Sesquiterpenoids	385.2	101	+	0.755483	24709.9
44019@[M+H]+@RANK1	485-49-4;485-50-7	C09372;C09364	C20H17NO6	367.106	(+)-Bicuculline	Alkaloids	368.1	307.1	+	5.8759	24567.2
44091@[M+H]+@RANK1	959-33-1		C16H14O2	238.099	2-(4-Methoxybenzal)acetophenone	Flavonoids	239.1	103.1	+	6.5518	24369.9
71467@[M+H]+@RANK1	29307-60-6	C16965	C23H34O15	550.19	Genipin-1-O-gentiobioside	Iridoids	551.2	515.2	+	4.66561	24344.3
62390@[M-H]-@RANK1	488-45-9	C01507	C6H14O6	182.079	L-Iditol	Organooxygen compounds	181.1	59	-	1.53297	24136.6
6608@[M+H]+@RANK1	114-25-0	C00500	C33H34N4O6	582.248	Biliverdin	Tetrapyrroles and derivatives	583.3	547.2	+	12.8224	24121
66058@[M+H]+@RANK1	2747-05-9	C03837	C12H10O4	218.058	4-Methylumbelliferyl acetate	Coumarins	219.1	159	+	10.0625	24103.1
87365@[M+H]+@RANK1	70110-59-7		C27H48O2	404.365	5-Heneicosylresorcinol	Phenols	405.4	123	+	12.0504	24051.5
64204@[M+H]+@RANK1	52117-69-8	C16418	C17H14O6	314.079	3-O-Acetylpinobanksin	Flavonoids	315.1	91.1	+	10.209	23819
43765@[M+H]+@RANK1	484-29-7	C10660	C12H9NO2	199.063	Dictamnine	Alkaloids	200.1	129.1	+	9.89777	23791.2
68635@[M+H]+@RANK1	58471-10-6	C10857	C13H17NO2	219.126	Darlingine	Alkaloids	220.1	118.1	+	11.1273	23736.3
44865@[M+H]+@RANK1	531-95-3	C14131	C15H14O3	242.094	4',7-Isoflavandiol	Flavonoids	243.1	123	+	11.3455	23735.4
90617@[M+H]+@RANK1	104700-96-1		C30H48O2	440.365	Ganoderol B	Triterpenoids	441.4	405.4	+	11.2112	23648.8
43722@[M+H]+@RANK1	522-17-8	C10417	C23H22O6	394.142	Deguelin	Flavonoids	395.1	192.1	+	12.9237	23609
44747@[M+H]+@RANK1	19408-84-5	C16952	C18H29NO3	307.215	Dihydrocapsaicin	Alkaloids	308.2	137.1	+	11.9366	23504.3
65553@[M+H]+@RANK1	56-69-9	C01017	C11H12N2O3	220.085	5-Hydroxytryptophan	Alkaloids	221.1	175.1	+	10.8756	23493.9
49169@[M+H]+@RANK1	20013-23-4	C05990	C22H22O11	462.116	Isoscoparin	Flavonoids	463.1	445.1	+	6.23297	23476.3
4198@[M-H]-@RANK1	110-16-7	C01384	C4H4O4	116.011	Maleic acid	Carboxylic acids and derivatives	115	71	-	0.926363	23455.1
3527@[M+H]+@RANK1	17605-67-3	C08817	C29H48O	412.371	Fucosterol	Steroids	413.4	353.3	+	12.0752	23421.7
696@[M-H]-@RANK1	775-01-9	C05580	C8H8O5	184.037	3,4-Dihydroxymandelic acid	Phenols	183	137	-	14.1953	23391.9
69561@[M+H]+@RANK1	70-70-2	C13342	C9H10O2	150.068	1-(4-Hydroxyphenyl)propan-1-one	Phenylpropanoids	151.1	121	+	9.89965	23335.4
47967@[M+H]+@RANK1;52565@[M+H]+@RANK1	492-14-8	C09614;C03567	C15H12O5	272.068	Butin;2'-Hydroxydihydrodaidzein	Flavonoids;Isoflavonoids	273.1	121	+	8.82805	23210.2
67704@[M+H]+@RANK1	475-81-0	C09446	C21H25NO4	355.178	Glaucine	Alkaloids	356.2	294.1	+	8.87817	23198.5
7017@[M+H]+@RANK1	151-18-8	C05670	C3H6N2	70.0531	Beta-Aminopropionitrile	Organonitrogen compounds	71.1	54	+	0.7387	23155.8
4022@[M-H]-@RANK1	97-53-0	C10453	C10H12O2	164.084	Eugenol	Phenylpropanoids	163.1	148.1	-	4.77485	23067.7
91683@[M+H]+@RANK1	18887-19-9		C20H18O5	338.115	Methyl tanshinonate	Diterpenoids	339.1	171.1	+	11.4294	22966.3
89218@[M+H]+@RANK1	1034-01-1		C15H22O5	282.147	Octyl Gallate	Phenols	283.2	153	+	12.9734	22940.7
265@[M+NA]+@RANK1	83-44-3	C04483	C24H40O4	392.293	Deoxycholic acid	Steroids and steroid derivatives	415.3	258.9	+	4.67422	22905.3
44726@[M+H]+@RANK1	99-24-1		C8H8O5	184.037	Methyl gallate	Phenols	185	125	+	4.4436	22878
62819@[M+H]+@RANK1	921-28-8	C04411	C7H12O5	176.068	3-Isopropylmalate	Fatty Acyls	177.1	131.1	+	10.7917	22613.3
64374@[M+H]+@RANK1	5096-57-1	C03329	C20H21NO4	339.147	Canadine	Alkaloids	340.2	294.1	+	8.22387	22598.4
STD_17650-84-9@+@RANK1	17650-84-9	C21833	C27H30O15	594.159	Kaempferol-3-O-rutinoside	flavonoids	595	449	+	6.29	22585.6
3303@[M-H]-@RANK1	2185-16-2;6205-08-9	C00437	C7H14N2O3	174.1	N-Acetylornithine	Carboxylic acids and derivatives	173.1	131.1	-	1.77372	22550
47575@[M+H]+@RANK1	485-63-2	C14313	C15H10O5	270.053	3',4',7-Trihydroxyisoflavone	Flavonoids	271.1	109	+	8.9791	22525.4
47514@[M+H]+@RANK1	93859-63-3	C09758	C30H22O10	542.121	Isochamaejasmine	Flavonoids	543.1	153	+	11.5469	22466.2
94906@[M+H]+@RANK1	5655-61-8	C09837	C12H20O2	196.146	Bornyl acetate	Monoterpenoids	197.2	137.1	+	6.54107	22436.6
5987@[M+NA]+@RANK1		C00275	C6H13O9P	260.03	Mannose 6-phosphate	Organooxygen compounds	283	185	+	13.0278	22310.3
67234@[M+H]+@RANK1	630-64-8	C08869	C29H42O9	534.283	Helveticoside	Steroids and steroid derivatives	535.3	499.3	+	6.49523	22308.2
71450@[M+H]+@RANK1;71707@[M+H]+@RANK1;91557@[M+H]+@RANK1	20084-99-5;87827-55-2;6750-60-3	C16945;C17462	C15H24O	220.183	alpha-Cyperol;Alismol;Spathulenol	Prenol lipids;Sesquiterpenoids	221.2	203.2	+	10.8901	22166.3
67729@[M-H]-@RANK1	6754-13-8	C09473	C15H18O4	262.121	Helenalin	Sesquiterpenoids	261.1	199.1	-	4.72943	22103.4
67534@[M+H]+@RANK1	509-80-8	C09227	C21H24N2O4	368.174	Mitraphylline	Alkaloids	369.2	55.1	+	13.0238	21827
68062@[M+H]+@RANK1	500-62-9	C09980	C15H14O4	258.089	Yangonin	Phenols	259.1	161.1	+	12.1175	21740.4
72157@[M+H]+@RANK1	34136-53-3	C18326	C13H18N2O2	234.137	N-p-Coumaroyl putrescine	Phenolamides	235.1	72.1	+	4.1624	21687.6
87036@[M+H]+@RANK1	68353-24-2		C19H27NO	285.209	1-Methyl-2-nonylquinolin-4(1H)-one	Alkaloids	286.2	43.1	+	11.1441	21644
44654@[M+H]+@RANK1	73573-88-3	C13963	C23H34O5	390.241	Mevastatin	Diterpenoids	391.2	185.1	+	12.0671	21390.4
STD_29106-49-8@+@RANK1	29106-49-8	C17639	C30H26O12	578.142	Procyanidin B2	flavonoids	579	427	+	4.78	21388.5
43904@[M+H]+@RANK1	89-31-6	C09640	C11H15NO2	193.11	(-)-Salsoline	Tetrahydroisoquinolines	194.1	117.1	+	4.25108	21315.5
2956@[M+H]+@RANK1	738-70-5	C01965	C14H18N4O3	290.138	Trimethoprim	Phenol ethers	291.1	123.1	+	5.08325	21295.8
71736@[M+H]+@RANK1	23513-15-7	C17496	C21H34O4	350.246	10-Gingerol	Phenols	351.3	151.1	+	12.4352	21108
92922@[M+H]+@RANK1	73815-21-1		C10H20O3	188.141	2,6-Dimethyl-7-octene-2,3,6-triol	Monoterpenoids	189.1	153.1	+	3.81923	21103.5
71354@[M+H]+@RANK1	14062-59-0	C16803	C26H28O14	564.148	Glucofrangulin B	Anthraquinones	565.2	385.1	+	5.68965	21020.1
45772@[M+H]+@RANK1	10417-94-4	C06428	C20H30O2	302.225	Eicosapentaenoic acid	Fatty Acyls	303.2	285.2	+	6.86445	20983.9
67393@[M+H]+@RANK1	523-50-2	C09060	C11H6O3	186.032	Angelicin	Phenylpropanoids	187	131	+	8.97272	20855.9
89507@[M+H]+@RANK1	7630-74-2		C19H19NO2	293.142	Dehydronuciferine	Alkaloids	294.1	206.1	+	5.65608	20810.3
58320@[M+H]+@RANK1	138-55-6	C17055	C16H26O7	330.168	Picrocrocin	Monoterpenoids	331.2	151.1	+	9.24762	20800.4
89925@[M+H]+@RANK1;94067@[M+H]+@RANK1	2034-74-4;36450-02-9		C29H48O2	428.365	7-Oxo-beta-sitosterol;6beta-Hydroxystigmast-4-en-3-one	Steroids and steroid derivatives	429.4	411.4	+	13.5441	20769.1
89181@[M+H]+@RANK1	107390-08-9		C24H28O7	428.184	Garcinone D	Xanthones	429.2	411.2	+	13.5608	20769.1
2975@[M+H]+@RANK1	54-16-0	C05635	C10H9NO3	191.058	5-Hydroxyindole-3-acetic acid	Indoles and derivatives	192.1	146.1	+	10.5462	20684.8
1434@[M+H]+@RANK1	434-22-0	C07254	C18H26O2	274.193	Nandrolone	Steroids and steroid derivatives	275.2	257.2	+	10.5841	20652.8
228@[M+H]+@RANK1	84-80-0	C02059	C31H46O2	450.35	Vitamin K1	Quinones	451.4	187.1	+	13.4366	20561.8
48003@[M+H]+@RANK1	61020-70-0	C10204	C17H16O6	316.095	Cajanol	Isoflavonoids	317.1	123	+	12.0504	20548.3
91754@[M+H]+@RANK1;94271@[M+H]+@RANK1	35030-38-7;3484-61-5		C20H30O3	318.219	ent-17-Hydroxykaur-15-en-19-oic acid;12-Hydroxyabietic acid	Diterpenoids	319.2	255.2	+	5.53484	20447.7
65777@[M+H]+@RANK1	90-43-7	C02499	C12H10O	170.073	2-Biphenylol	Benzene and substituted derivatives	171.1	152.1	+	8.72735	20438.5
71441@[M+H]+@RANK1	1585-68-8	C16929	C15H14O4	258.089	Catalpalactone	Sesquiterpenoids	259.1	67.1	+	12.8392	20356.6
6215@[M-H]-@RANK1	134-35-0	C00440	C20H25N7O6	459.187	5-Methyltetrahydrofolic acid	Pteridines and derivatives	458.2	329.1	-	3.28003	20348.9
64175@[M+H]+@RANK1	531-44-2	C01527	C16H18O9	354.095	Scopolin	Phenylpropanoids	355.1	193.1	+	9.98607	20331
STD_60-82-2@+@RANK1	60-82-2	C00774	C15H14O5	274.084	Phloretin	flavonoids	274.9	169	+	8.85	20179.6
90190@[M+H]+@RANK1	1182-34-9		C25H24O12	516.127	1,4-Dicaffeoylquinic acid	Phenylpropanoids	517.1	121	+	5.76832	20167.9
3276@[M-H]-@RANK1	303-38-8	C00196	C7H6O4	154.027	2,3-Dihydroxybenzoic acid	Phenols	153	109	-	7.04578	20049.4
3832@[M+H]+@RANK1	213382-49-1	C14772	C20H34O4	338.246	5,6-DHET	Fatty Acyls	339.3	303.2	+	13.0338	19989.3
90675@[M+H]+@RANK1	114343-74-7		C20H34O4	338.246	Sterebin E	Diterpenoids	339.3	303.2	+	13.1931	19989.3
67454@[M+H]+@RANK1;92059@[M+H]+@RANK1	63320-67-2;55465-97-9	C09132	C26H36O11	524.226	Secoisolariciresinol monoglucoside;Mascaroside	Lignans;Naphthofurans	525.2	489.2	+	7.8966	19921.7
44804@[M+H]+@RANK1	27740-96-1	C09642	C10H13NO2	179.095	Salsolinol	Tetrahydroisoquinolines	180.1	163.1	+	4.33023	19902.7
95854@[M+H]+@RANK1	159853-36-8		C20H14O3	302.094	4'-O-Methylirenolone	Phenols	303.1	233.1	+	5.18742	19870.7
91474@[M+H]+@RANK1	20279-06-5		C19H31NO3	321.23	Homodihydrocapsaicin I	Miscellaneous	322.2	137.1	+	13.3091	19862.5
94496@[M+H]+@RANK1	74058-71-2		C23H39NO	345.303	Macamide B	Alkaloids	346.3	91.1	+	8.8496	19802
71911@[M+H]+@RANK1	481-73-2	C17810	C15H10O6	286.048	Citreorosein	Anthraquinones	287.1	269	+	7.58612	19762.9
68631@[M+H]+@RANK1	52418-07-2	C10853	C15H19NO3	261.136	Cochlearine	Alkaloids	262.1	121	+	13.7622	19691.1
85002@[M+H]+@RANK1	64849-39-4		C32H50O13	642.325	Rubusoside	Diterpenoids	643.3	319.2	+	4.91763	19679.5
2253@[M+H]+@RANK1	50-55-5	C06539	C33H40N2O9	608.273	Reserpine	Alkaloids	609.3	195.1	+	6.01748	19623.4
3390@[M-H]-@RANK1	3616-42-0	C00352	C6H14NO8P	259.046	Glucosamine 6-phosphate	Organooxygen compounds	258	97	-	2.5011	19611.5
73565@[M+H]+@RANK1	7380-40-7	C22152	C21H22O4	338.152	Bergamotine	Coumarins	339.2	203	+	13.0338	19604
64376@[M+H]+@RANK1	24240-04-8;485-91-6	C02134	C21H23NO5	369.158	Allocryptopine	Alkaloids	370.2	324.2	+	13.5944	19590.6
52850@[M+H]+@RANK1	13463-28-0	C09732	C27H32O15	596.174	Eriocitrin	Flavonoids	597.2	271.1	+	5.93998	19502.6
52843@[M+H]+@RANK1	13241-32-2	C09805	C27H32O15	596.174	Neoeriocitrin	Flavonoids	597.2	271.1	+	5.99175	19502.6
STD_552-66-9@+@RANK1	552-66-9	C10216	C21H20O9	416.111	Daidzin	flavonoids	416.9	255	+	5.45	19486.6
68323@[M+H]+@RANK1	14364-08-0	C10433	C15H18O9	342.095	1-O-Caffeoylglucose	Carbohydrates	343.1	163	+	4.91738	19426.4
91786@[M+H]+@RANK1	55483-24-4		C20H30O4	334.214	ent-16beta,17-dihydroxy-9(11)-kauren-19-oic acid	Diterpenoids	335.2	271.2	+	7.14977	19390.8
66516@[M+H]+@RANK1	877-95-2	C06746	C10H13NO	163.1	Quinic acid	Organooxygen compounds	164.1	105.1	+	8.62665	19390.6
58386@[M+H]+@RANK1	506-13-8	C18218	C16H32O3	272.235	16-Hydroxy hexadecanoic acid	Lipids	273.2	55.1	+	6.51402	19386.8
53841@[M+H]+@RANK1	490-23-3	C14154	C28H42O2	410.318	Beta-Tocotrienol	Phenols	411.3	151.1	+	12.1846	19258.3
4233@[M+H]+@RANK1	4289-98-9	C03145	C6H11NO3S	177.046	N-formylmethionine	Amino acid and derivatives	178.1	61	+	0.673567	19191.8
58131@[M+NA]+@RANK1	42553-65-1	C08589	C44H64O24	976.379	Crocin	Diterpenoids	999.4	675.3	+	7.04544	19142.2
392@[M+H]+@RANK1	123-78-4	C00319	C18H37NO2	299.282	Sphingosine	Organonitrogen compounds	300.3	282.3	+	11.9476	19135.9
44206@[M+H]+@RANK1	528-48-3	C10041	C15H10O6	286.048	Fisetin	Flavonoids	287.1	137	+	7.05843	19019.8
STD_1617-53-4@+@RANK1	1617-53-4	C10018	C30H18O10	538.09	Amentoflavone	flavonoids	539	402.9	+	9.78	18942.6
STD_482-36-0@+@RANK1	482-36-0	C10073	C21H20O12	464.096	Hyperoside	flavonoids	465.4	302.8	+	6.99	18928.3
88036@[M+H]+@RANK1	35349-68-9		C24H24O6	408.157	9-Hydroxycalabaxanthone	Xanthones	409.2	55.1	+	13.2903	18927
91681@[M+H]+@RANK1	1603-47-0		C12H8O5	232.037	8-Hydroxybergapten	Coumarins	233	205.1	+	10.5567	18866
3329@[M-H]-@RANK1	77-95-2	C00296	C7H12O6	192.063	D-(-)-Quinic acid	Quinolines and derivatives	191.1	85	-	3.95053	18674.4
36370@[M+H]+@RANK1		C14809	C20H34O5	354.241	Trioxilin A3	Fatty Acyls	355.2	319.2	+	10.9663	18667.1
67003@[M+H]+@RANK1	108605-70-5	C08472	C16H13NO5	299.079	Avenanthramide A	Cinnamic acids and derivatives	300.1	119	+	12.0689	18559
3687@[M+H]+@RANK1	58-68-4	C00004	C21H29N7O14P2	665.125	NADH	Nucleotide and its derivates	666.1	649.1	+	12.0025	18539
68660@[M+H]+@RANK1	7374-79-0	C10890	C28H36O13	580.216	Acanthoside B	Lignans	581.2	419.2	+	6.51402	18487.9
90634@[M+H]+@RANK1	112430-68-9		C30H46O4	470.34	Ganoderic acid Jb	Triterpenoids	471.3	407.3	+	9.23922	18438.6
64427@[M+H]+@RANK1	131580-36-4	C10850	C7H13NO3	159.09	Calystegine A3	Alkaloids	160.1	142.1	+	3.27292	18399.5
47619@[M+H]+@RANK1	17817-31-1	C14314	C15H10O5	270.053	6,7,4'-Trihydroxyisoflavone	Flavonoids	271.1	105	+	10.7581	18396.9
92731@[M+H]+@RANK1	32453-36-4		C27H30O16	610.153	Quercetin 3-O-neohesperidoside	Flavonoids	611.2	303.1	+	6.5859	18383.9
71464@[M+H]+@RANK1;71540@[M+H]+@RANK1	465-11-2;472-26-4	C16962;C17072	C24H34O5	402.241	Gamabufotalin;Telocinobufagin	Steroids	403.2	367.2	+	6.79732	18365.3
66796@[M+H]+@RANK1		C08062	C12H11NO4	233.069	2-Hydroxy-6-oxo-(2'-aminophenyl)-hexa-2,4-dienoate		234.1	120	+	10.5735	18345.1
67761@[M+H]+@RANK1	63569-07-3	C09509	C20H26O5	346.178	Microhelenin C	Sesquiterpenoids	347.2	55.1	+	2.63517	18344.4
84958@[M+NA]+@RANK1	64432-06-0		C38H60O17	788.383	Dulcoside A	Diterpenoids	811.4	649.3	+	7.53577	18186.1
34515@[M-H]-@RANK1	306-23-0	C03672	C9H10O4	182.058	Hydroxyphenyllactic acid	Phenylpropanoids	181.1	135	-	5.03653	18015
63098@[M-H]-@RANK1	2584-71-6	C03440	C5H9NO3	131.058	cis-4-Hydroxy-D-proline	Amino acid and derivatives	130.1	45	-	0.6463	17933.2
35697@[M+NA]+@RANK1	263399-34-4	C14828	C18H34O4	314.246	9,10-DHOME	Fatty Acyls	337.2	43	+	13.2965	17861.5
67206@[M+H]+@RANK1	4965-97-3	C08789	C30H50O4	474.371	Bryodulcosigenin	Triterpenoids	475.4	439.4	+	9.93572	17829.2
43746@[M+H]+@RANK1	20702-77-6		C28H36O15	612.205	Neosperidin dihydrochalcone	Chalcones	613.2	305.1	+	12.4554	17698.4
STD_40246-10-4@+@RANK1	40246-10-4	C16195	C22H22O10	446.121	Glycitin	flavonoids	447.4	284.9	+	5.57	17624.3
44660@[M-H]-@RANK1	480-66-0	C21895	C8H8O4	168.042	2',4',6'-Trihydroxyacetophenone	Phenols	167	123	-	4.23298	17602.6
53322@[M]+@RANK1	586-62-9	C06075	C10H16	136.125	Terpinolene	Monoterpenoids	136.1	93.1	+	10.5735	17583
78@[M+H]+@RANK1	553-12-8	C02191	C34H34N4O4	562.258	Protoporphyrin IX	Tetrapyrroles and derivatives	563.3	504.3	+	11.358	17555.7
64202@[M+H]+@RANK1	480-37-5	C16419	C16H14O4	270.089	Pinostrobin	Flavonoids	271.1	167	+	8.7777	17440.1
58133@[M+H]+@RANK1	95975-55-6		C22H30O3	342.219	Guggulsterone E&Z	Steroids	343.2	325.2	+	11.077	17425
4238@[M+H]+@RANK1	83-86-3	C01204	C6H18O24P6	659.861	Phytic acid	Miscellaneous	660.9	446.9	+	4.47413	17421.1
68380@[M+H]+@RANK1	40456-50-6	C10557	C22H24O7	400.152	Yatein	Lignans	401.2	161.1	+	12.6042	17391.7
1862@[M-H]-@RANK1	58001-44-8	C06662	C8H9NO5	199.048	Clavulanate	Carboxylic acids and derivatives	198	108	-	3.07453	17318.2
87991@[M+H]+@RANK1	79559-59-4		C19H20O	264.151	1,7-Diphenyl-4-hepten-3-one	Phenols	265.2	105.1	+	5.89982	17286.9
87144@[M+H]+@RANK1	23800-56-8		C12H16O4	224.105	Pogostone	Miscellaneous	225.1	71.1	+	4.9512	17269.3
67500@[M+NA]+@RANK1	57817-89-7	C09189	C38H60O18	804.378	Stevioside	Diterpenoids	827.4	665.3	+	6.74547	17238.3
68639@[M+H]+@RANK1	4540-25-4	C10863	C16H21NO4	291.147	Phyllalbine	Alkaloids	292.2	124.1	+	5.06868	17218.1
537@[M+H]+@RANK1	50-02-2	C06945;C15643	C22H29FO5	392.2	Dexamethasone	Steroids and steroid derivatives	393.2	147.1	+	12	17199.5
202@[M+H]+@RANK1	475-31-0	C01921	C26H43NO6	465.309	Glycocholate	Steroids and steroid derivatives	466.3	412.3	+	5.41955	17012.9
68118@[M+H]+@RANK1	22172-17-4	C10083	C15H12O6	288.063	Swertiaperennin	Xanthones	289.1	165	+	5.11903	16980.9
7061@[M+H]+@RANK1	2743-90-0;581-49-7	C10126	C10H12N2	160.1	Anatabine	Alkaloids	161.1	144.1	+	2.81978	16935.9
325@[M+H]+@RANK1	61-54-1	C00398	C10H12N2	160.1	Tryptamine	Tryptamine derivatives	161.1	144.1	+	2.85568	16935.9
63104@[M+H]+@RANK1	140-10-3	C00423	C9H8O2	148.052	Cinnamic acid	Phenylpropanoids	149.1	131	+	2.83657	16902.4
68662@[M+H]+@RANK1	19950-55-1	C10892	C22H28O5	372.194	Veraguensin	Lignans	373.2	137.1	+	6.74697	16886.9
3432@[M+H]+@RANK1	528-53-0	C05908	C15H10O7	302.043	Delphinidin	Flavonoids	303	229	+	6.85828	16681.4
65595@[M+H]+@RANK1	3929-61-1	C01425	C10H16N2O7	276.096	Glu-Glu	Amino acid and derivatives	277.1	102.1	+	5.40433	16666.8
6026@[M+NA]+@RANK1	321-02-8	C01185	C11H14NO9P	335.041	Nicotinic acid mononucleotide	Organooxygen compounds	358	121	+	5.65608	16632.3
4159@[M+H]+@RANK1	591-81-1	C00989	C4H8O3	104.047	4-Hydroxybutanoic acid	Fatty Acyls	105.1	87	+	0.6372	16520.2
69076@[M+H]+@RANK1		C11501	C10H11N5O5	281.076	9-Riburonosyladenine		282.1	136.1	+	12.5371	16485.2
STD_17306-46-6@+@RANK1	17306-46-6	C12627	C27H30O14	578.164	Rhoifolin	flavonoids	579	433	+	6.5	16467
67559@[M+H]+@RANK1	23458-02-8	C09259	C14H14O4	246.089	Decursinol	Coumarins	247.1	175	+	7.9889	16466.7
1911@[M+H]+@RANK1	64-86-8	C07592	C22H25NO6	399.168	Colchicine	Alkaloids	400.2	267.1	+	5.0924	16450.4
STD_446-72-0@+@RANK1	446-72-0	C06563	C15H10O5	270.053	Genistein	flavonoids	271.2	242.8	+	8.93	16426.4
3376@[M+H]+@RANK1	65-46-3	C00475	C9H13N3O5	243.086	Cytidine	Nucleotide and its derivates	244.1	112.1	+	0.704329	16397.3
43908@[M+H]+@RANK1	1258-84-0	C08633	C30H40O4	464.293	Pristimerin	Triterpenoids	465.3	201.1	+	6.8515	16215.3
68318@[M+H]+@RANK1	52946-22-2	C10426	C13H14O4	234.089	1'-Acetoxychavicol acetate	Phenols	235.1	175.1	+	10.5509	16183.6
34744@[M+H]+@RANK1;68222@[M+H]+@RANK1	6003-11-8;373-49-9	C10291;C08362	C15H10O4;C16H30O2	254.05790999999999;254.22458	Alizarin 2-methyl ether;Palmitoleic acid	Anthraquinones;Fatty Acyls	255.15	237.15	+	7.37993	16167.7
41043@[M+H]+@RANK1	481-74-3	C10315	C15H10O4	254.058	Chrysophanol;Chrysophanic acid; Chrysophanol	Anthraquinones	255.1	152.1	+	7.45617	16098.9
64329@[M+H]+@RANK1	18786-24-8	C09241	C21H20N2O3	348.147	Serpentine	Alkaloids	349.2	219.1	+	5.80713	16084.6
66962@[M+H]+@RANK1	83327-20-2	C08422	C16H20N2O10S2	464.056	4-Hydroxyglucobrassicin	Miscellaneous	465.1	190	+	6.06763	15976.3
3409@[M+H]+@RANK1	491-70-3	C01514	C15H10O6	286.048	Luteolin	Flavonoids	287.1	153	+	8.18482	15893.8
71587@[M+H]+@RANK1	589-98-0	C17144	C8H18O	130.136	3-Octyl alcohol	Miscellaneous	131.1	113.1	+	1.2254	15841.5
48237@[M+H]+@RANK1;68249@[M+H]+@RANK1;68307@[M+H]+@RANK1	24094-45-9;117-02-2;67685-22-7	C10327;C10402;C10200	C15H10O4	254.058	Digiferruginol;Rubiadin;Anhydroglycinol	Anthraquinones;Phenols	255.1	237.1	+	10.5902	15818
71735@[M+H]+@RANK1	23513-08-8	C17495	C19H30O4	322.214	8-Gingerol;8-GINGEROL	Phenols	323.2	151.1	+	9.06302	15814.1
90313@[M+H]+@RANK1;90678@[M+H]+@RANK1;90975@[M+H]+@RANK1	81907-62-2;100665-42-7;81907-61-1		C30H44O7	516.309	Ganoderic acid A;Ganoderenic acid C;Ganoderic acid B	Triterpenoids	517.3	481.3	+	12.386	15789.7
92752@[M+H]+@RANK1	341971-45-7		C30H46O5	486.335	Actinidic acid	Triterpenoids	487.3	423.3	+	12.9425	15782
66696@[M+H]+@RANK1	539-86-6	C07600	C6H10OS2	162.017	Allicin	Miscellaneous	163	41	+	10.5735	15628.8
45732@[M+H]+@RANK1	487-52-5	C08578	C15H12O5	272.068	Butein	Chalcones	273.1	137	+	7.06635	15591.6
51985@[M+H]+@RANK1	484-76-4	C08724	C15H12O6	288.063	Okanin	Chalcones	289.1	135	+	5.99175	15513
90733@[M+H]+@RANK1	6380-28-5		C12H16O2	192.115	Carvacryl acetate	Monoterpenoids	193.1	133.1	+	11.228	15473
67576@[M+H]+@RANK1	1362-42-1	C09286	C30H40O6	496.282	Absinthiin	Triterpenoids	497.3	461.3	+	12.4987	15434.4
67533@[M-H]-@RANK1	4098-40-2	C09226	C23H30N2O4	398.221	Mitragynine	Corynanthean-type alkaloids	397.2	365.2	-	11.0977	15340.5
44877@[M+H]+@RANK1	643-10-7;87-89-8	C00137	C6H12O6	180.063	Inositol	Organooxygen compounds	181.1	163.1	+	9.93572	15327.6
64341@[M+H]+@RANK1	20824-29-7	C03470	C27H34N2O9	530.226	Strictosidine	Alkaloids	531.2	513.2	+	0.78905	15153.4
66591@[M+H]+@RANK1	98-85-1	C07112	C8H10O	122.073	1-Phenylethanol	Phenols	123.1	105.1	+	10.5567	14902.3
3242@[M-H]-@RANK1	110-17-8	C00122	C4H4O4	116.011	Fumaric acid	Organic acids and derivatives	115	71	-	0.534483	14854.1
68521@[M+H]+@RANK1	72520-92-4	C10715	C20H28O12	460.158	Paeonolide	Phenols	461.2	167.1	+	12.0671	14716.9
2277@[M+H]+@RANK1	302-79-4	C00777	C20H28O2	300.209	Retinoic acid	Diterpenoids	301.2	123.1	+	8.46123	14611
68282@[M+H]+@RANK1	478-08-0	C10369	C15H10O5	270.053	Lucidin	Anthraquinones	271.1	253.1	+	8.89468	14508.6
673@[M+H]+@RANK1	110988-86-8;95058-81-4	C07650	C9H14F2N3O13P3	502.971	Gemcitabine	Pyrimidine nucleosides	504	112.1	+	5.50503	14503.9
73545@[M+H]+@RANK1	67416-61-9		C32H48O5	512.35	3-O-Acetyl-11-keto-beta-boswellic acid	Triterpenoids	513.4	95.1	+	12.3021	14500.2
71411@[M+H]+@RANK1	27742-14-9	C16889	C23H46ClNO4	435.312	Pahutoxin	Alkaloids	436.3	122.1	+	5.72322	14477.4
88536@[M+H]+@RANK1	94-26-8		C11H14O3	194.094	Butyl 4-Hydroxybenzoate	Lignans	195.1	57.1	+	4.5632	14472.8
71480@[M+H]+@RANK1	18607-90-4	C16982	C10H10O4	194.058	Kakuol	Phenols	195.1	57	+	4.58198	14472.8
71437@[M+H]+@RANK1	26091-79-2	C16925	C17H16O6	316.095	Byakangelicol	Coumarins	317.1	85.1	+	12.0671	14417.4
47307@[M+H]+@RANK1	130405-40-2		C22H18O10	442.09	(-)-Catechin gallate(CG)	Flavonoids	443.1	123	+	5.97497	14388.7
68357@[M+H]+@RANK1	104777-68-6	C10485	C29H36O16	640.2	Plantamajoside	Phenylpropanoids	641.2	137.1	+	6.16878	14346.5
84975@[M+H]+@RANK1	5965-66-2	C01970	C12H22O11	342.116	beta-Lactose	Carbohydrates	343.1	163.1	+	4.5652	14342.9
49656@[M+H]+@RANK1	22384-63-0	C10119	C16H12O7	316.058	Pedalitin	Flavonoids	317.1	109	+	12.0839	14323.3
49995@[M+H]+@RANK1	490-31-3	C10177	C15H10O7	302.043	Robinetin	Flavonoids	303	137	+	6.82813	14323
44399@[M+H]+@RANK1	574-84-5	C09265	C10H8O5	208.037	Fraxetin	Coumarins	209	82	+	5.25558	14277.1
66960@[M+H]+@RANK1	21414-41-5	C08419	C12H23NO10S3	437.048	Glucoraphanin	Miscellaneous	438.1	163	+	8.72735	14253.6
372@[M-H]-@RANK1	1186-30-7;358-72-5	C00235	C5H12O7P2	246.006	Dimethylallylpyrophosphate	Prenol lipids	245	79	-	4.51327	14078.9
50258@[M+H]+@RANK1	482-39-3	C16911	C21H20O10	432.106	Afzelin;Kaempferol 3-O-rhamnoside (Kaempferin)	Flavonoids	433.1	287.1	+	5.95192	14076
64938@[M+H-H2O]+@RANK1	18524-94-2	C01433	C17H26O10	390.153	Loganin	Terpene	373.1	179.1	+	5.09568	14002
64181@[M+H]+@RANK1	118-34-3	C01533	C17H24O9	372.142	Syringin	Phenylpropanoids	373.1	193.1	+	4.61489	13991.6
73310@[M+H]+@RANK1	3804-70-4	C19707	C14H14O4	246.089	Columbianetin	Coumarins	247.1	229.1	+	10.4895	13904.6
64436@[M+H]+@RANK1	18747-42-7	C06184	C9H17NO	155.131	Methylisopelletierine	Alkaloids	156.1	98.1	+	4.11205	13846.7
71805@[M+H]+@RANK1	6032-32-2	C17599	C13H18O7	286.105	4-Methoxyphenyl beta-D-glucopyranoside	Phenols	287.1	125.1	+	5.52182	13845.8
88798@[M+H]+@RANK1	25956-17-6		C18H16N2O8S2	452.035	Allura Red AC	Miscellaneous	453	371.1	+	5.96845	13794.8
50510@[M+H]+@RANK1	18609-17-1	C12667	C27H30O17	626.148	Quercetin-3-O-sophoroside	Flavonoids	627.2	303.1	+	6.24348	13771.4
69949@[M+H]+@RANK1	620-92-8	C14298	C13H12O2	200.084	4,4'-Methylenediphenol	Phenols	201.1	107	+	8.72735	13737.5
STD_491-80-5@+@RANK1	491-80-5	C00814	C16H12O5	284.068	Biochanin A	flavonoids	285.3	269.3	+	11.21	13721.6
44855@[M-H]-@RANK1	580-72-3	C10682	C20H22O6	358.142	Matairesinol;(-)-Matairesinol	Lignans	357.1	83	-	9.1185	13675
3420@[M+H]+@RANK1;92746@[M+H]+@RANK1	490-46-0;35323-91-2	C09727;C09728	C15H14O6	290.079	Epicatechin;(+)-Epicatechin	Flavonoids	291.1	139	+	5.07785	13605.7
68881@[M+H]+@RANK1	123948-87-8	C11158	C23H23N3O5	421.164	Topotecan	Alkaloids	422.2	377.1	+	5.18617	13563.9
43259@[M+H]+@RANK1	61337-67-5;85650-52-8	C07570	C17H19N3	265.158	Mirtazapine	Piperazinoazepines	266.2	195.1	+	8.76572	13563.4
53261@[M+H]+@RANK1	14531-52-3	C10254	C14H14O2	214.099	Dihydropinosylvin	Phenols	215.1	123	+	10.5735	13549.6
91797@[M+H]+@RANK1	20086-06-0		C19H20O6	344.126	Diosbulbin B	Diterpenoids	345.1	83	+	2.61838	13512.4
192@[M-H]-@RANK1	463-40-1	C06427	C18H30O2	278.225	Linolenic acid	Lipids	277.2	59	-	12.1691	13467.9
STD_26544-34-3@+@RANK1	26544-34-3	C04858	C26H28O14	564.148	Apiin	flavonoids	565.5	432.9	+	6.46	13430.5
STD_520-27-4@+@RANK1	520-27-4	C10039	C28H32O15	608.174	Diosmin	flavonoids	609.1	463	+	6.59	13420.2
88539@[M+H]+@RANK1	696-60-6		C7H9NO	123.068	4-Hydroxybenzylamine	Alkaloids	124.1	107	+	2.2995	13401.5
64247@[M+H]+@RANK1	18466-51-8	C12137	C21H20O10	432.106	Pelargonidin-3-O-glucoside	Flavonoids	433.1	271.1	+	5.93538	13399.6
3239@[M+H]+@RANK1	111-42-2	C06772	C4H11NO2	105.079	Diethanolamine	Alkaloids	106.1	45	+	1.05122	13342.8
64453@[M+H]+@RANK1	497-88-1	C10171	C14H21NO	219.162	(-)-Sedamine	Alkaloids	220.2	202.2	+	11.1273	13266
72293@[M+H]+@RANK1	57369-32-1	C18487	C11H11NO	173.084	1,2,5,6-Tetrahydro-4H-pyrrolo[3,2,1-ij]quinolin-4-one	Quinolines and derivatives	174.1	146.1	+	10.5567	13253.6
2276@[M+H]+@RANK1;41512@[M+H]+@RANK1	116-31-4;514-85-2	C00376;C16681	C20H28O	284.214	Retinal;9-cis-Retinal	Prenol lipids	285.2	161.1	+	9.07232	13246.4
1201@[M+H]+@RANK1	2009-24-7	C00841	C11H6O4	202.027	Xanthotoxol	Phenylpropanoids	203	175	+	8.74288	13182.8
4005@[M+H]+@RANK1	586-60-7	C07881	C18H27NO2	289.204	Dyclonine	Organooxygen compounds	290.2	98.1	+	5.96135	13172.1
65805@[M+H]+@RANK1	107-85-7	C02640	C5H13N	87.1048	3-Methyl-1-butylamine	Alkaloids	88.1	71.1	+	3.59178	13117.1
66572@[M+H]+@RANK1		C07084	C8H10O2	138.068	Styrene-cis-2,3-dihydrodiol		139.1	39	+	5.11903	13117
24048@[M+H]+@RANK1	53-43-0	C01227	C19H28O2	288.209	Dehydroepiandrosterone	Steroids and steroid derivatives	289.2	253.2	+	5.14703	13111.4
52511@[M+H]+@RANK1	551-15-5	C16989	C21H22O9	418.126	Liquiritin	Flavonoids	419.1	239.1	+	5.73073	13078.7
48006@[M+H]+@RANK1	482-01-9	C10457	C17H16O6	316.095	Homoferreirin	Flavonoids	317.1	153	+	8.0896	13066.9
94115@[M+H]+@RANK1	62025-50-7		C41H70O13	770.482	Ginsenoside F3	Triterpenoids	771.5	735.5	+	12.3224	12986.8
95042@[M+H]+@RANK1	144525-40-6		C20H22O9	406.126	Oxyresveratrol 3'-O-beta-D-glucopyranoside	Phenols	407.1	227.1	+	11.586	12969.6
52931@[M+H]+@RANK1	446-71-9	C09756	C16H14O6	302.079	Homoeriodictyol	Flavonoids	303.1	153	+	6.83088	12968.3
STD_24211-30-1@+@RANK1	24211-30-1	C09734	C17H16O5	300.1	Farrerol	flavonoids	301.3	180.9	+	10.61	12927.3
STD_21293-29-8@-@RANK1	21293-29-8	C06082	C15H20O4	264.136	(+)-Abscisic acid	phytohormone	263	153	-	7.86	12919.7
45823@[M+H]+@RANK1	638-26-6	C03195	C18H36O3	300.266	(R)-10-Hydroxystearate		301.3	265.3	+	11.5857	12859.2
44383@[M+H]+@RANK1	6147-11-1	C10080	C24H26O6	410.173	alpha-Mangostin	Xanthones	411.2	355.1	+	12.3074	12853.9
68596@[M+H]+@RANK1	61825-98-7	C10808	C27H43NO3	429.324	Sipeimine	Alkaloids	430.3	394.3	+	13.0405	12816.3
62459@[M+H-H2O]+@RANK1	13137-52-5	C01112	C5H11O8P	230.019	D-Arabinose 5-phosphate	Organooxygen compounds	213	99	+	6.29383	12757.8
91684@[M+H]+@RANK1	101383-35-1		C34H24O10	592.137	Mulberrofuran Q	Phenols	593.1	575.1	+	13.2755	12723.4
89485@[M+H]+@RANK1	178895-25-5		C24H26O13	522.137	Salviaflaside	Phenylpropanoids	523.1	181.1	+	7.1162	12710.4
7066@[M+H]+@RANK1	554-62-1	C12144	C18H39NO3	317.293	4-Hydroxysphinganine	Lipids	318.3	60	+	5.5386	12624.7
67277@[M+H]+@RANK1	77996-04-4	C08928	C34H28O9	580.173	Mulberrofuran C	Phenols	581.2	137	+	12.8056	12563
48689@[M+H]+@RANK1	61360-94-9	C04024	C27H30O15	594.158	Vitexin 2''-glucoside	Flavonoids	595.2	415.1	+	4.91037	12521.5
48723@[M+H]+@RANK1	20310-89-8	C08064	C27H30O15	594.158	Saponarin	Flavonoids	595.2	415.1	+	4.93855	12521.5
389@[M-H]-@RANK1	2387-71-5	C03406	C10H18N4O6	290.123	Argininosuccinate	Organic acids	289.1	131.1	-	4.49458	12515.2
93750@[M+H]+@RANK1	71305-89-0		C12H14O	174.104	6(1H)-Azulenone, 2,3-dihydro-1,4-dimethyl	Miscellaneous	175.1	157.1	+	8.72735	12509.7
68362@[M-H]-@RANK1	555-66-8	C10494	C17H24O3	276.173	6-Shogaol	Phenols	275.2	139.1	-	4.80317	12430.5
67570@[M+H]+@RANK1	15085-71-9	C09277	C15H12O6	288.063	Micromelin	Coumarins	289.1	203	+	5.1253	12395.6
68320@[M+H]+@RANK1	5273-86-9	C10430	C12H16O3	208.11	beta-Asarone	Phenylpropanoids	209.1	41	+	4.94343	12322.4
67399@[M+H]+@RANK1	469-83-0	C09066	C20H28O3	316.204	Cafestol;Caffeyl alcohol	Diterpenoids	317.2	281.2	+	5.47147	12192.3
84994@[M+H]+@RANK1	6879-01-2		C22H33NO4	375.241	Tuberostemonine	Alkaloids	376.2	302.2	+	6.51202	12173.7
71703@[M+H]+@RANK1	18483-17-5	C17458	C27H24O18	636.096	1,3,6-Tri-O-galloylglucose	Phenols	637.1	153	+	5.79035	12164.2
91030@[M+H]+@RANK1	110241-23-1		C30H40O8	528.272	Ganoderenic acid E	Triterpenoids	529.3	493.3	+	12.7888	12163.2
90732@[M+H]+@RANK1	99353-00-1		C19H18O8	374.1	Methyl rosmarinate	Phenylpropanoids	375.1	121	+	6.59593	12130.7
68382@[M+H]+@RANK1	22055-22-7	C10559	C21H16O7	380.09	Diphyllin	Lignans	381.1	335.1	+	10.0868	12111.8
67751@[M+H]+@RANK1	41059-80-7	C09497	C17H22O5	306.147	Lipiferolide	Sesquiterpenoids	307.2	247.1	+	5.35675	12109.1
44387@[M+H]+@RANK1	522-11-2	C10670	C18H21NO6	347.137	Evoxine	Alkaloids	348.1	231.1	+	6.48762	12044.5
67941@[M+H]+@RANK1	511-89-7	C09797	C21H26O12	470.142	Plumieride	Iridoids	471.1	435.1	+	6.59593	11921.8
71486@[M+H]+@RANK1	1617-70-5	C16990	C30H48O	424.371	Lupenone	Triterpenoids	425.4	95.1	+	10.8252	11870.9
68345@[M+H]+@RANK1	14534-61-3	C10468	C25H24O12	516.127	Isochlorogenic acid B;(1S,3R,4R,5R)-3,4-bis[[(E)-3-(3,4-dihydroxyphenyl)prop-2-enoyl]oxy]-1,5-dihydroxycyclohexane-1-carboxylic acid;3,4-Di-O-caffeoylquinic acid	Phenylpropanoids	517.1	121	+	6.6175	11862.9
91659@[M+H]+@RANK1	20931-37-7		C25H28O6	424.189	Beta-mangostin	Xanthones	425.2	69.1	+	13.2084	11845.8
50595@[M+H]+@RANK1	491-50-9	C12639	C21H20O12	464.095	Quercetin-7-O-beta-D-glucopyranoside	Flavonoids	465.1	285	+	6.1007	11822.5
90487@[M+H]+@RANK1	34539-84-9		C20H28O	284.214	6,7-Dehydroferruginol	Diterpenoids	285.2	269.2	+	9.06125	11796.9
68891@[M+H]+@RANK1	86639-52-3	C11173	C22H20N2O5	392.137	7-Ethyl-10-Hydroxycamptothecin	Alkaloids	393.1	263.1	+	6.28257	11763
STD_548-77-6@+@RANK1	548-77-6	C10534	C16H12O6	300.063	Tectorigenin	flavonoids	300.9	285.5	+	9.03	11750.6
45976@[M+H]+@RANK1	73347-43-0	C14780	C20H32O3	320.235	11(R)-HETE	Fatty Acyls	321.2	285.2	+	5.40433	11736.1
89783@[M+H]+@RANK1	10284-63-6	C03844	C7H14O6	194.079	D-Pinitol	Miscellaneous	195.1	177.1	+	0.617182	11619.1
47793@[M+H]+@RANK1	66056-19-7	C10486	C20H18O6	354.11	Licoisoflavone A	Flavonoids	355.1	55.1	+	10.9763	11563.1
63526@[M+H]+@RANK1		C04044	C9H10O4	182.058	3-(2,3-Dihydroxyphenyl)propanoate		183.1	137.1	+	7.9889	11506.8
68228@[M+H]+@RANK1;68242@[M+H]+@RANK1	520-68-3;32728-78-2	C10299;C10319	C20H31NO7	397.21	Echimidine;Heliosupine	Alkaloids	398.2	55.1	+	4.51485	11397.4
43969@[M+H]+@RANK1	480-36-4		C28H32O14	592.179	Linarin	Flavonoids	593.2	285.1	+	7.64963	11385.5
STD_480-41-1@+@RANK1	480-41-1	C00509	C15H12O5	272.068	Naringenin	flavonoids	273.3	152.8	+	8.86	11336
3532@[M-H]-@RANK1	3493-09-2	C00361	C10H15N5O10P2	427.029	dGDP	Purine nucleotides	426	79	-	3.11937	11303.9
71165@[M+H]+@RANK1		C16264	C13H10O6	262.048	2-Hydroxy-6-oxo-6-(2-carboxyphenyl)-hexa-2,4-dienoate		263.1	171	+	8.72735	11281.8
64212@[M+H]+@RANK1	31712-49-9	C16422	C22H24O11	464.132	Hesperetin 7-O-glucoside	Flavonoids	465.1	285.1	+	6.06763	11229.1
92924@[M+H]+@RANK1	17015-43-9		C15H18O3	246.126	Curcolone	Sesquiterpenoids	247.1	229.1	+	8.37492	11213.8
4151@[M-H]-@RANK1	13095-48-2	C03196	C5H8O5	148.037	L-2-Hydroxyglutaric acid	Fatty Acyls	147	57	-	4.11955	11012
91043@[M+H]+@RANK1	113085-62-4		C21H28O5	360.194	7-O-Methylrosmanol	Diterpenoids	361.2	55.1	+	10.8588	10971.3
275@[M-H]-@RANK1	692-29-5	C00232	C4H6O3	102.032	Succinic acid semialdehyde	Fatty Acyls	101	57	-	2.12157	10902.1
5456@[M+H]+@RANK1	4433-40-3	C03088	C5H6N2O3	142.038	5-Hydroxymethyluracil	Nucleotide and its derivates	143	82	+	2.78622	10877.5
43944@[M-H]-@RANK1	517-28-2	C09931	C16H14O6	302.079	Hematoxylin	Flavonoids	301.1	109	-	2.75568	10838.8
64207@[M+H]+@RANK1	20725-03-5	C01378	C15H12O6	288.063	Fustin	Flavonoids	289.1	121	+	7.58762	10778.5
3504@[M+H]+@RANK1	537-15-5;20283-92-5	C01850	C18H16O8	360.085	Rosmarinic acid	Phenylpropanoids	361.1	163	+	6.98997	10759.1
67222@[M+H]+@RANK1	68978-04-1	C08846	C25H28O4	392.199	Mulberrofuran A	Phenols	393.2	55.1	+	13.2252	10743.4
5734@[M+H]+@RANK1	1445-07-4	C02067	C9H12N2O6	244.07	Pseudouridine	Nucleotide and its derivates	245.1	184.1	+	8.72735	10673
47923@[M+H]+@RANK1	41743-73-1	C17958	C20H18O8	386.1	Irisflorentin	Flavonoids	387.1	167.1	+	8.64343	10666.8
53443@[M+H]+@RANK1	100347-96-4	C17492	C15H22O2	234.162	Curcumenone	Sesquiterpenoids	235.2	217.2	+	10.5567	10655
73472@[M+H]+@RANK1	2565-01-7	C19985	C20H21NO4	339.147	Nantenine	Alkaloids	340.2	281.1	+	12.1175	10607.7
94114@[M+H]+@RANK1	53963-43-2		C36H62O9	638.439	Ginsenoside F1	Triterpenoids	639.4	603.4	+	9.1116	10572.2
3433@[M+H]+@RANK1	51-34-3	C01851	C17H21NO4	303.147	Scopolamine	Alkaloids	304.2	138.1	+	6.85828	10537
61678@[M+H]+@RANK1		C03033	C25H38O8	466.257	3-alpha-hydroxy-5-alpha-androstane-17-one 3-D-glucuronide	Organooxygen compounds	467.3	273.2	+	12.3524	10526.2
3597@[M+H]+@RANK1	514-78-3	C08583	C40H52O2	564.397	Canthaxanthin	Prenol lipids	565.4	203.1	+	12.8235	10521.1
44431@[M+H]+@RANK1	495-59-0	C10656	C11H12N2	172.1	Desoxypeganine	Alkaloids	173.1	144.1	+	8.3764	10483.3
71521@[M+H]+@RANK1	29070-92-6	C17044	C33H52O5	528.381	Pachymic acid	Triterpenoids	529.4	469.4	+	12.7049	10446.3
53782@[M+H]+@RANK1;70103@[M+H]+@RANK1	1449-05-4;471-53-4;560-66-7	C02283;C14495	C30H46O4;C31H50O3	470.33960999999999;470.37599499999999	Glycyrrhetinic acid;Eburicoic acid	Triterpenoids	471.35	407.35	+	10.5735	10444.9
67571@[M+H]+@RANK1	495-31-8	C09279	C20H24O9	408.142	Nodakenin	Coumarins	409.1	229.1	+	11.5133	10434.7
521@[M-H]-@RANK1	57-96-5	C07317	C23H20N2O3S	404.119	Sulfinpyrazone	Benzene and substituted derivatives	403.1	125	-	3.40372	10377.1
41045@[M-H]-@RANK1	518-82-1	C10343	C15H10O5	270.053	Emodin	Anthraquinones	269	225	-	7.28363	10343.9
64358@[M+H]+@RANK1;6967@[M+H]+@RANK1	485-19-8;3968-19-2	C02105;C12328;C05178	C19H23NO4	329.163	Reticuline;(R)-Reticuline	Alkaloids	330.2	149.1	+	5.23977	10343.7
67849@[M+H]+@RANK1	2718-25-4	C09619	C21H21NO6	383.137	Rhoeadine	Alkaloids	384.1	310.1	+	9.29797	10309.1
71482@[M+H]+@RANK1	24697-74-3	C16985	C14H21N3O5	311.148	Leonurine hydrochloride	Alkaloids	312.2	60.1	+	5.76604	10299.1
1215@[M-H]-@RANK1	555-30-6	C07194	C10H13NO4	211.084	(-)-3-(3,4-Dihydroxyphenyl)-2-methylalanine	Amino acid and its derivatives	210.1	149.1	-	3.61768	10289.1
53239@[M+H]+@RANK1	29700-22-9	C10273	C14H12O4	244.074	Oxyresveratrol	Phenols	245.1	123	+	8.74413	10273.5
86876@[M+H]+@RANK1	5531-98-6		C20H23NO2	309.173	Atherosperminine	Alkaloids	310.2	265.1	+	6.14278	10263.9
68115@[M+H]+@RANK1	4773-96-0	C10077	C19H18O11	422.085	Mangiferin	Xanthones	423.1	273	+	5.14306	10263.7
41673@[M+H]+@RANK1;90677@[M+H]+@RANK1;90897@[M+H]+@RANK1;90968@[M+H]+@RANK1;91453@[M+H]+@RANK1	2222-07-3;100665-40-5;95311-97-0;100665-41-6;294674-09-2	C08800	C30H42O7	514.293	Cucurbitacin I;Ganoderenic acid A;Ganoderic acid C1;Ganoderenic acid B;Ganoderic acid Z	Triterpenoids	515.3	479.3	+	12.5179	10260.1
43917@[M+H]+@RANK1	485-72-3	C00858	C16H12O4	268.074	Formononetin	Flavonoids	269.1	197.1	+	9.9393	10251.7
3448@[M-H]-@RANK1	529-44-2	C10107	C15H10O8	318.038	Myricetin	Flavonoids	317	151	-	6.63582	10236.2
68133@[M+H]+@RANK1;68139@[M+H]+@RANK1	116174-63-1;118396-02-4	C10124;C10132	C8H15NO4	189.1	Alexine;Australine	Alkaloids	190.1	154.1	+	3.45753	10216.8
71670@[M+H]+@RANK1	58479-68-8	C17410	C57H92O28	1224.58	Platycodin D	Triterpenoids	1225.6	1189.6	+	8.50695	10117.9
89875@[M+H]+@RANK1	3671-38-3		C45H73NO15	867.498	Beta-Solamarine	Alkaloids	868.5	396.3	+	7.65325	10105.6
51827@[M+H]+@RANK1	5041-81-6	C16978	C21H22O9	418.126	Isoliquiritin; Isoliquiritoside	Chalcones	419.1	239.1	+	6.9421	10104
44805@[M+H-H2O]+@RANK1	537-33-7	C02325	C11H14O4	210.089	Sinapyl alcohol	Hydroxycinnamoyl derivatives	193.1	161.1	+	4.43093	10091
STD_545-97-1@-@RANK1	545-97-1	C00859	C19H24O6	348.157	Gibberellin A1	phytohormone	347	259	-	6.12	10039.3
67257@[M+H]+@RANK1	57944-18-0	C08904	C45H76O19	920.498	Officinalisinin I	Steroids and steroid derivatives	921.5	741.4	+	14.014	9891.07
36661@[M+H]+@RANK1	72-89-9	C00024	C23H38N7O17P3S	809.126	Acetyl-CoA	Fatty Acyls	810.1	303.1	+	6.65627	9769.04
1457@[M-H]-@RANK1	611-59-6	C13747	C7H8N4O2	180.065	1,7-Dimethylxanthine	Nucleotide and its derivates	179.1	122	-	3.39217	9749.13
STD_28608-75-5@+@RANK1	28608-75-5	C10114	C21H20O11	448.101	Orientin	flavonoids	449.4	422.3	+	5.56	9703.05
44088@[M+H]+@RANK1;58130@[M+H]+@RANK1;67082@[M+H]+@RANK1;90112@[M+H]+@RANK1;90457@[M+H]+@RANK1;90792@[M+H]+@RANK1;91784@[M+H]+@RANK1;91950@[M+H]+@RANK1	472-15-1;631-69-6;28282-27-1;76035-62-6;13878-92-7;24160-36-9;24480-45-3;25499-90-5	C08619;C08623	C30H48O3	456.36	Betulinic acid;Beta-boswellic acid;a,b-Elemolic acid;3-Epikatonic acid;Isomangiferolic acid;Trametenolic acid;Bryonolic acid;3-Epioleanolic acid	Triterpenoids	457.4	393.4	+	12.9279	9687.17
63330@[M+H]+@RANK1	30626-96-1	C18038	C21H32O3	332.235	7alpha-Hydroxypregnenolone	Prenol lipids	333.2	297.2	+	7.48993	9683.43
73576@[M+H]+@RANK1	18797-79-0		C21H21NO5	367.142	(+)-Corynoline	Alkaloids	368.1	289.1	+	5.42288	9678.98
3262@[M+H]+@RANK1	99-06-9	C00587	C7H6O3	138.032	3-Hydroxybenzoic acid	Phenols	139	121	+	8.39115	9654.55
STD_480-40-0@+@RANK1	480-40-0	C10028	C15H10O4	254.058	Chrysin	flavonoids	255.2	152.8	+	10.94	9615.56
87315@[M+H]+@RANK1	35176-46-6		C25H44O2	376.334	5-Nonadecylresorcinol	Phenols	377.3	123	+	9.01267	9604.1
6931@[M+H]+@RANK1	14371-10-9;104-55-2	C00903	C9H8O	132.058	Cinnamaldehyde	Phenylpropanoids	133.1	55	+	6.34418	9465.92
48365@[M+H]+@RANK1	482-83-7	C10414	C16H12O4	268.074	Dalbergin	Coumarins	269.1	241.1	+	9.86183	9430.79
64754@[M+H]+@RANK1	154361-50-9	C12650	C15H22FN3O6	359.149	Capecitabine	Alkaloids	360.2	244.1	+	7.87143	9420.94
44374@[M+H]+@RANK1	544-62-7	C13858	C21H44O3	344.329	4-Oxadocosane-1,2-diol	Miscellaneous	345.3	57	+	2.63743	9360.76
64534@[M+H]+@RANK1		C15769	C8H7NO3	165.043	(R)-2-Hydroxy-2H-1,4-benzoxazin-3(4H)-one	Benzoxazines	166	108	+	5.0519	9317.7
67655@[M+H]+@RANK1	5890-28-8	C09389	C19H19NO4	325.131	Cassythicine	Alkaloids	326.1	252.1	+	9.90317	9280.34
3344@[M-H]-@RANK1	3019-74-7	C02076;C08355	C7H14O7	210.074	Sedoheptulose	Organooxygen compounds	209.1	59	-	3.97403	9267.39
89560@[M+H]+@RANK1	831-61-8		C9H10O5	198.053	Ethyl gallate	Phenols	199.1	153	+	8.86262	9256.01
64196@[M+H]+@RANK1	22608-11-3	C17742	C20H18O5	338.115	Demethoxycurcumin	Phenols	339.1	147	+	4.91037	9255.05
89725@[M+H]+@RANK1	526-07-8		C20H18O7	370.105	Sesamolin	Lignans	371.1	203.1	+	7.55255	9178.61
64227@[M+H]+@RANK1	21637-25-2	C05623	C21H20O12	464.095	Isoquercitrin	Flavonoids	465.1	303	+	6.21822	9166.76
3410@[M+H]+@RANK1	520-18-3	C05903	C15H10O6	286.048	Kaempferol	Flavonoids	287.1	153	+	9.39002	9152.42
48109@[M+H]+@RANK1	13401-40-6	C10514	C20H18O4	322.121	Phaseollin	Phenols	323.1	265.1	+	10.8588	9135.81
87513@[M+H]+@RANK1	121748-11-6		C11H16O6	244.095	threo-1-C-Syringylglycerol	Phenylpropanoids	245.1	153.1	+	8.72735	9124.87
86844@[M+H]+@RANK1	548-08-3		C18H17NO2	279.126	Roemerine	Alkaloids	280.1	206.1	+	8.0896	9108.33
68111@[M+H]+@RANK1	491-64-5	C10070	C14H10O5	258.053	Isogentisin	Xanthones	259.1	241.1	+	7.75395	9079.06
44847@[M-H]-@RANK1	10338-51-9	C06046	C14H20O7	300.121	Salidroside	Phenols	299.1	59	-	4.17693	9073.98
366@[M+H]+@RANK1	1210-83-9	C00978	C12H14N2O2	218.106	N-Acetyl-5-hydroxytryptamine	Tryptamine derivatives	219.1	160.1	+	11.1243	9051.77
71312@[M+H]+@RANK1	25161-41-5	C16752	C24H32O10	480.2	Acevaltrate	Iridoids	481.2	85.1	+	5.55538	9018.46
STD_120330-92-9@-@RANK1	120330-92-9	C18699	C18H29NO4	323.21	N-((-)-jasmonoyl)-S-isoleucine	phytohormone	322	130	-	10.41	9012.46
43862@[M+H]+@RANK1	5631-70-9		C18H16O5	312.1	Trimethylapigenin	Flavonoids	313.1	269.1	+	10.797	8994.34
63619@[M+NA]+@RANK1	499-20-7	C05143	C14H17NO7	311.101	Dhurrin	Alkaloids	334.1	123	+	13.3259	8894.14
94924@[M+H]+@RANK1	69884-00-0		C42H72O14	800.492	Pseudoginsenoside F11	Triterpenoids	801.5	475.4	+	6.09218	8868.09
94844@[M+H]+@RANK1	38412-47-4		C11H10O3	190.063	Altechromone A	Phenols	191.1	173.1	+	8.24692	8835.92
58316@[M+H]+@RANK1	36062-04-1		C21H24O6	372.157	Tetrahydrocurcumin	Phenols	373.2	137.1	+	9.38188	8834.99
44920@[M+H]+@RANK1	162359-56-0		C19H33NO2	307.251	Fingolimod hydrochloride	Miscellaneous	308.3	105.1	+	13.1077	8826.9
6956@[M-H]-@RANK1;72016@[M-H]-@RANK1	776-86-3;92-61-5	C18079;C01752	C10H8O4	192.042	Isoscopoletin;Scopoletin	Coumarins;Phenylpropanoids	191	176	-	6.20788	8819.74
41502@[M+H]+@RANK1	472-87-7	C05918	C20H26O	282.198	Vitamin A2 aldehyde	Prenol lipids	283.2	173.1	+	11.2478	8767.33
64209@[M+H]+@RANK1	115063-39-3	C16416	C20H20O5	340.131	Desmethylxanthohumol	Chalcones	341.1	119	+	13.0095	8746.32
64325@[M+H]+@RANK1;64328@[M+H]+@RANK1	25532-45-0;6474-90-4	C11683;C11682	C21H24N2O3	352.179	Mayumbine;Tetrahydroalstonine	Alkaloids	353.2	142.1	+	11.0937	8730
STD_22888-70-6@+@RANK1	22888-70-6	C07610	C25H22O10	482.121	Silibinin	flavonoids	483.5	464.8	+	8.65	8716.33
93742@[M+H]+@RANK1	80434-33-9		C24H32O6	416.22	gamma-Diasarone	Lignans	417.2	385.2	+	8.5475	8712.72
61651@[M+H]+@RANK1	38632-24-5	C03033	C14H19NO8	329.111	Dopamine glucuronide	Organooxygen compounds	330.1	154.1	+	5.20295	8630.67
47573@[M+H]+@RANK1	90-29-9	C10522	C16H10O5	282.053	Pseudobaptigenin	Isoflavonoids	283.1	255.1	+	11.2616	8554
71704@[M+H-H2O]+@RANK1	19885-10-0	C17459	C30H50O5	490.366	Alisol A	Triterpenoids	473.4	383.3	+	7.26725	8541.1
67543@[M+H]+@RANK1;71479@[M+H]+@RANK1	76-66-4;6859-01-4	C09236;C16980	C22H28N2O4	384.205	Rhynchophylline;Isorhyncophylline	Alkaloids	385.2	325.2	+	8.66022	8527.88
43599@[M+H]+@RANK1	1257-08-5		C22H18O10	442.09	(-)-Epicatechin gallate	Flavonoids	443.1	123	+	6.19705	8487.53
94103@[M+H]+@RANK1	78214-33-2	C22128	C36H62O8	622.444	20(S)-Ginsenoside Rh2	Triterpenoids	623.5	443.4	+	10.2286	8482.28
86292@[M-H]-@RANK1	76060-35-0		C17H22O4	290.152	1-Dehydro-6-gingerdione	Phenols	289.1	134	-	4.96927	8475.75
43899@[M+H]+@RANK1	484-20-8	C01557	C12H8O4	216.042	Bergapten	Coumarins	217	202	+	11.2416	8444.62
34525@[M-H]-@RANK1	57-91-0	C02537	C18H24O2	272.178	17alpha-Estradiol;17a-Estradiol	Steroids and steroid derivatives	271.2	145.1	-	7.80197	8285.29
1408@[M+H]+@RANK1	389-08-2	C05079	C12H12N2O3	232.085	Nalidixic Acid	Diazanaphthalenes	233.1	215.1	+	10.4408	8208.2
71671@[M+H]+@RANK1	24502-78-1	C17413	C18H18O6	330.11	Acetylshikonin	Quinones	331.1	55.1	+	6.39453	8193.1
71682@[M+H]+@RANK1	517-66-8	C17426	C20H21NO4	339.147	Dicentrine	Alkaloids	340.2	281.1	+	8.94553	8174.49
68628@[M+H]+@RANK1	14912-30-2	C10849	C12H19NO2S2	273.086	Brugine	Alkaloids	274.1	142.1	+	6.04208	8132.38
44385@[M+H]+@RANK1	27013-91-8	C08954	C41H66O12	750.455	alpha-Hederin	Triterpenoids	751.5	437.3	+	8.16313	8090.17
91093@[M+H]+@RANK1	104759-35-5		C30H44O3	452.329	Ganoderic acid S	Triterpenoids	453.3	391.3	+	9.21405	8018.37
90652@[M+H]+@RANK1	116383-31-4		C25H32O13	540.184	Oleuroside	Iridoids	541.2	137.1	+	12.7301	8004.54
66654@[M+H]+@RANK1	133040-01-4	C07467	C23H24N2O4S	424.146	Eprosartan	Benzene and substituted derivatives	425.2	333.1	+	12.0671	7941.33
68547@[M+H]+@RANK1	56293-29-9	C10748	C15H24N2	232.194	Aloperine	Alkaloids	233.2	174.1	+	7.2169	7901.32
65528@[M+H]+@RANK1	486-60-2	C00758	C11H6O4	202.027	Bergaptol	Coumarins	203	175	+	7.43507	7872.64
58200@[M+H]+@RANK1	17592-23-3	C05583	C9H10O4	182.058	3-Methoxy-4-hydroxyphenylglycolaldehyde	Phenols	183.1	123	+	7.9889	7847.2
62029@[M+H]+@RANK1	538-23-8	C13044	C27H50O6	470.361	1,2,3-Tri-n-Octanoylglycerol	Miscellaneous	471.4	327.3	+	10.5735	7817.5
24063@[M+NA]+@RANK1	2540-56-9	C04056	C18H32O2	280.24	Bovinic acid	Fatty Acyls	303.2	183	+	6.85638	7765.01
50852@[M+H]+@RANK1	17912-87-7	C10108	C21H20O12	464.095	Myricitrin;Myricetin 3-O-rhamnoside (Myricitrin)	Flavonoids	465.1	319	+	6.84467	7721.25
42@[M+H]+@RANK1	59-92-7	C00355	C9H11NO4	197.069	Levodopa	Amino acid and derivatives	198.1	152.1	+	9.86707	7718.79
3712@[M-H]-@RANK1	516-05-2	C02170	C4H6O4	118.027	Methylmalonic acid	Organic acids	117	73	-	3.22912	7669.93
51643@[M+H]+@RANK1	489-35-0	C04109	C15H10O8	318.038	Gossypetin	Flavonoids	319	109	+	6.46067	7658.98
52936@[M+H]+@RANK1	78708-33-5	C17531	C21H22O12	466.111	Plantagoside	Flavonoids	467.1	287.1	+	6.84767	7617.84
66895@[M+H]+@RANK1	487-93-4	C08299	C12H16N2O	204.126	Bufotenine	Alkaloids	205.1	160.1	+	10.5735	7604
2496@[M+H]+@RANK1	57-92-1	C00413	C21H39N7O12	581.266	Streptomycin	Organooxygen compounds	582.3	263.1	+	12.839	7505.63
1200@[M+H]+@RANK1	298-81-7	C01864	C12H8O4	216.042	Xanthotoxin	Phenylpropanoids	217	174	+	9.24029	7493.79
43733@[M+H]+@RANK1	482-48-4	C18082	C12H8O4	216.042	Isobergapten	Coumarins	217	202	+	9.93717	7473.36
91798@[M+H]+@RANK1	20086-07-1		C19H22O7	362.137	Diosbulbin C	Diterpenoids	363.1	299.1	+	10.7749	7383.96
STD_520-34-3@+@RANK1	520-34-3	C10038	C16H12O6	300.063	Diosmetin	flavonoids	301.3	285.8	+	9.15	7361.53
71539@[M+H]+@RANK1	14215-86-2	C17071	C16H22O9	358.126	Sweroside	Iridoids;Terpene	359.1	109	+	5.27294	7266
3533@[M+H]+@RANK1	1053-73-2	C00054	C10H15N5O10P2	427.029	Adenosine 3',5'-diphosphate	Purine nucleotides	428	136.1	+	11.8934	7250.73
3491@[M+H]+@RANK1	7689-03-4	C01897	C20H16N2O4	348.111	Camptothecin	Alkaloids	349.1	305.1	+	0.728133	7156
89874@[M+H]+@RANK1	20318-30-3		C45H73NO16	883.493	Solamarine	Alkaloids	884.5	396.3	+	7.68163	7155.48
86457@[M+H]+@RANK1;STD_1912-33-0@+@RANK1	1912-33-0	C20635	C11H11NO2	189.078979;189.078979	Methyl (indol-3-yl)acetate;Methyl 3-indolylacetate	Alkaloids;phytohormone	190.05	130.05	+	9.48	7154.56
49525@[M+H]+@RANK1	973-67-1	C10024	C18H16O5	312.1	5,6,7-Trimethoxyflavone	Flavonoids	313.1	281.1	+	10.8455	7111.5
44665@[M+H]+@RANK1	526-31-8	C02983	C12H14N2O2	218.106	Abrine	Alkaloids	219.1	132.1	+	10.9143	7090.36
43882@[M+H]+@RANK1	521-61-9	C17045	C16H12O5	284.068	Physcion	Anthraquinones	285.1	168.1	+	8.23672	7045.72
73436@[M+H]+@RANK1	4382-56-3	C19932	C21H22N2O3	350.163	Perakine	Alkaloids	351.2	291.1	+	7.19185	7023.17
67170@[M+H]+@RANK1	25514-29-8	C08751	C23H28O11	480.163	Bruceine B	Diterpenoids	481.2	421.1	+	11.1944	7006.3
63053@[M+H]+@RANK1	607-80-7	C10882	C20H18O6	354.11	Sesamin	Lignans	355.1	135	+	10.0916	6961.48
69354@[M+H]+@RANK1	29429-03-6	C12187	C16H19NO4	289.131	Pseudolycorine	Alkaloids	290.1	254.1	+	4.76158	6896.76
64309@[M+H]+@RANK1	35878-41-2	C16225	C16H16O4	272.105	Vestitol	Flavonoids	273.1	123	+	6.51202	6891.79
44474@[M+H]+@RANK1	24808-04-6		C15H14O5	274.084	(-)-Epiafzelechin	Flavonoids	275.1	139	+	5.66032	6889.85
STD_489-32-7@+@RANK1	489-32-7	C17555	C33H40O15	676.237	Icariin	flavonoids	677.1	531.1	+	8.12	6873.83
86780@[M+H]+@RANK1	5950-12-9		C16H19NO3	273.136	Piperlonguminine	Alkaloids	274.1	57.1	+	10.5735	6834.86
44358@[M-H]-@RANK1	3106-85-2	C12270	C11H16N2O8	304.091	N-Acetylaspartylglutamate	Carboxylic acids and derivatives	303.1	96	-	2.31495	6802.92
2443@[M+H]+@RANK1	79902-63-9	C07262	C25H38O5	418.272	Simvastatin	Diterpenoids	419.3	199.1	+	8.07463	6798.84
68276@[M+H]+@RANK1	23412-97-7	C10361	C20H27NO5	361.189	Phalaenopsine T	Alkaloids	362.2	91.1	+	10.5399	6777.83
71470@[M+H]+@RANK1	23013-84-5	C16968	C21H18O6	366.11	Neoglycyrol	Coumarins	367.1	55.1	+	13.8965	6714.48
93797@[M+H]+@RANK1	65995-64-4		C34H22O22	782.06	Punicalin	Phenols	783.1	765.1	+	0.577383	6681.87
53446@[M+H]+@RANK1	489-84-9	C09675	C15H18	198.141	Guaiazulene	Sesquiterpenoids	199.1	183.1	+	8.74413	6680.66
STD_7085-55-4@+@RANK1	7085-55-4		C33H42O19	742.232	Troxeruti	flavonoids	743.1	596.9	+	6.04	6666.38
41153@[M+H]+@RANK1	18296-45-2	C09776	C22H32O8	424.21	Didrovaltrate	Iridoids	425.2	85.1	+	10.2831	6659.59
67938@[M+H]+@RANK1	32619-42-4	C09794	C25H32O13	540.184	Oleuropein	Iridoids	541.2	137.1	+	7.40246	6635.67
61656@[M+H]+@RANK1	54964-61-3	C03033	C15H21NO9	359.122	Epinephrine glucuronide	Organooxygen compounds	360.1	166.1	+	11.2448	6596.31
5562@[M+H]+@RANK1	9007-28-7	C00607	C13H21NO15S	463.063	Chondroitin sulfate	Miscellaneous	464.1	99	+	6.17635	6476.54
66953@[M+H]+@RANK1	554-88-1	C08411	C11H21NO10S3	423.033	Glucoiberin	Organooxygen compounds	424	149	+	10.4653	6449.27
67292@[M+NA]+@RANK1	52286-59-6	C08944	C48H82O18	946.55	Ginsenoside Re	Triterpenoids	969.5	789.5	+	7.47273	6391.78
STD_480-43-3@+@RANK1	480-43-3	C05334	C16H14O5	286.084	Isosakuranetin	flavonoids	287.3	160.9	+	11.04	6370.96
43867@[M+H]+@RANK1	10180-88-8		C15H18O4	262.121	Desacetylmatricarin	Sesquiterpenoids	263.1	69	+	8.72855	6316.43
71523@[M+H]+@RANK1	487-41-2	C17048	C27H34O11	534.21	Phillyrin;Phillyroside	Phenylpropanoids	535.2	373.2	+	7.76102	6312.38
44039@[M+H]+@RANK1	7695-91-2	C13202	C31H52O3	472.392	DL-alpha-Tocopherylacetate	Phenols	473.4	207.1	+	13.3697	6283.01
3264@[M+H]+@RANK1	5006-66-6	C01020	C6H5NO3	139.027	6-hydroxynicotinic acid	Nicotinic acid derivatives	140	122	+	3.94167	6238.9
STD_21967-41-9@+@RANK1	21967-41-9	C10025	C21H18O11	446.085	Baicalin	flavonoids	447	430.9	+	7.26	6142.89
68117@[M+H]+@RANK1	5042-03-5	C10082	C13H8O5	244.037	1,5,6-Trihydroxyxanthone	Xanthones	245	227	+	10.4818	6124.81
41246@[M+H]+@RANK1	15291-76-6	C07603	C20H24O11	440.132	Ginkgolide C	Diterpenoids	441.1	325.1	+	10.47	6121.91
43822@[M+H]+@RANK1	476-28-8	C08532	C16H17NO4	287.116	Lycorine	Alkaloids	288.1	147	+	7.58542	6120.13
3345@[M+H]+@RANK1	6894-38-8	C08491	C12H18O3	210.126	Jasmonic acid	Fatty Acyls	211.1	151.1	+	6.72902	6087.06
65911@[M+H]+@RANK1	2280-01-5	C03137	C13H14N2O3	246.1	Acetyl tryptophan	Amino acid and derivatives	247.1	130.1	+	7.97212	6068.99
STD_59870-68-7@+@RANK1	59870-68-7	C10421	C20H20O4	324.136	Glabridin	flavonoids	325.4	188.9	+	11.58	6028.75
43672@[M+H]+@RANK1	115404-57-4		C30H48O3	456.36	Niloticin	Triterpenoids	457.4	379.2	+	9.37247	6024.41
68295@[M+H]+@RANK1	481-42-5	C10387	C11H8O3	188.047	Plumbagin	Quinones	189.1	41	+	8.72735	5971.02
41866@[M+H]+@RANK1	387-79-1	C05138	C21H32O3	332.235	17a-Hydroxypregnenolone	Steroids and steroid derivatives	333.2	297.2	+	8.33897	5950.99
43383@[M-H]-@RANK1	392-12-1	C00331	C11H9NO3	203.058	Indolepyruvate	Indoles and derivatives	202.1	128	-	3.02843	5945.19
61672@[M+H]+@RANK1	20605-81-6	C03033	C27H40O11	540.257	Tetrahydroaldosterone-3-glucuronide	Organooxygen compounds	541.3	347.2	+	0.721917	5885.53
44844@[M-H]-@RANK1	500-65-2		C15H14O4	258.089	Rhapontigenin	Phenols	257.1	241	-	7.18525	5784.95
64295@[M+H]+@RANK1	486-62-4	C10509	C22H22O9	430.126	Ononin;Formononetin 7-O-glucoside (Ononin)	Flavonoids	431.1	269.1	+	7.3	5757.66
41050@[M+H]+@RANK1;64300@[M+H]+@RANK1;95002@[M+H]+@RANK1	26296-54-8;23451-01-6;5928-26-7	C10384;C05376	C22H22O10	446.121	Physcion 1-O-beta-D-glucoside;Physcion 8-O-beta-D-monoglucoside;Sissotrin	Anthraquinones;Flavonoids	447.1	267.1	+	6.70138	5754.88
91113@[M+H]+@RANK1	13849-90-6		C30H46O4	470.34	3-Oxopomolic acid	Triterpenoids	471.3	407.3	+	12.2602	5741.51
86199@[M+H]+@RANK1	5574-24-3		C20H17NO5	351.111	Oxoglaucine	Alkaloids	352.1	188.1	+	13.8293	5739.65
68485@[M+H]+@RANK1	524-15-2	C10676	C13H11NO3	229.074	gamma-Fagarine	Alkaloids	230.1	198.1	+	9.29797	5732.11
68548@[M+H]+@RANK1	16837-52-8	C10749	C15H24N2O2	264.184	Oxymatrine	Alkaloids	265.2	166.1	+	8.37492	5677.36
67299@[M+H]+@RANK1	17184-21-3	C08953	C35H56O8	604.398	Cauloside A	Triterpenoids	605.4	455.4	+	7.4015	5665.15
68623@[M+H]+@RANK1	500-55-0	C10843	C17H21NO2	271.157	Apoatropine	Alkaloids	272.2	124.1	+	8.7762	5617.29
44642@[M-H]-@RANK1	93-35-6	C09315	C9H6O3	162.032	Umbelliferone	Phenylpropanoids	161	77	-	6.29674	5604
4199@[M+NA]+@RANK1	34612-38-9	C02052	C24H42O21	666.222	Maltotetraose	Carbohydrates	689.2	527.2	+	0.643344	5602.55
68360@[M+H]+@RANK1	96574-01-5	C10492	C26H22O10	494.121	Salvianolic acid A	Phenylpropanoids	495.1	181.1	+	7.74598	5581.06
3429@[M+H]+@RANK1	1746-32-3	C00357	C8H16NO9P	301.056	N-Acetyl-D-glucosamine 6-phosphate	Organooxygen compounds	302.1	99	+	5.50072	5511.58
67531@[M+H]+@RANK1	24880-43-1	C09224	C17H23NO3	289.168	Mesembrine	Alkaloids	290.2	232.1	+	5.10877	5483.35
47518@[M+H]+@RANK1	521-34-6	C10182	C33H24O10	580.137	Sciadopitysin	Flavonoids	581.1	563.1	+	12.8224	5398.24
88729@[M+H]+@RANK1	122001-32-5		C14H17NO5	279.111	Niazirin	Phenols	280.1	116	+	12.5371	5343.09
3430@[M-H]-@RANK1	476-66-4	C10788	C14H6O8	302.006	Ellagic acid	Phenols	301	145	-	6.12296	5305.66
6979@[M-H]-@RANK1	501-36-0	C03582	C14H12O3	228.079	Resveratrol	Phenols	227.1	143.1	-	7.89381	5287.74
93203@[M+H]+@RANK1	41442-57-3		C23H40O2	348.303	5-Heptadecylresorcinol	Phenols	349.3	123	+	7.43507	5213.86
44389@[M+H]+@RANK1	486-90-8	C10789	C15H20N2O	244.158	Thermopsine	Alkaloids	245.2	150.1	+	10.4847	5168.65
63102@[M-H]-@RANK1	1946-82-3	C12989	C8H16N2O3	188.116	N-Alpha-acetyllysine	Carboxylic acids and derivatives	187.1	145.1	-	1.35793	5168.15
68538@[M+H]+@RANK1	17948-33-3	C10738	C19H17NO3	307.121	Rutacridone	Alkaloids	308.1	252.1	+	12.8727	5132.06
64363@[M+H]+@RANK1	84-39-9	C05175	C19H17NO4	323.116	Stylopine	Alkaloids	324.1	266.1	+	9.14693	5120.95
67573@[M+H]+@RANK1	737-52-0;26091-73-6	C09282	C16H14O5	286.084	Oxypeucedanin	Coumarins	287.1	203	+	8.12317	5109.78
67594@[M+H]+@RANK1	477-33-8	C09310	C21H22O7	386.137	Samidin	Coumarins	387.1	55.1	+	5.93538	5099.92
41030@[M-H]-@RANK1	1162-65-8	C06800	C17H12O6	312.063	Aflatoxin B1	Coumarins and derivatives	311.1	267	-	7.76927	5095.69
568@[M-H]-@RANK1	320-67-2	C11262	C8H12N4O5	244.081	Azacitidine	Organooxygen compounds	243.1	110	-	2.58403	5053.09
68101@[M+H]+@RANK1	16265-56-8	C10059	C18H14O5	310.084	6-Deoxyjacareubin	Xanthones	311.1	255	+	6.57915	5040.96
44040@[M+H]+@RANK1	17944-23-9;13161-75-6	C09307	C21H22O7	386.137	(+)-Pteryxin	Coumarins	387.1	55.1	+	11.1064	5029.36
48004@[M+H]+@RANK1	30368-42-4	C10415	C15H12O6	288.063	Dalbergioidin	Flavonoids	289.1	153	+	5.99175	5009.07
64327@[M+H]+@RANK1	483-04-5	C09024	C21H24N2O3	352.179	Ajmalicine	Alkaloids	353.2	144.1	+	7.61968	4959.59
STD_468-44-0@-@RANK1	468-44-0	C11864	C19H24O5	332.162	Gibberellin A4	phytohormone	331	243	-	9.98	4939.65
67165@[M+H]+@RANK1	28831-65-4	C08745	C27H22O12	538.111	Lithospermic acid	Phenylpropanoids	539.1	181.1	+	7.1162	4904.61
44415@[M+H]+@RANK1	19685-09-7	C17939	C20H16N2O5	364.106	(S)-10-Hydroxycamptothecin	Alkaloids	365.1	321.1	+	8.03843	4898.55
603@[M+H]+@RANK1	71963-77-4		C16H26O5	298.178	Artemether	Sesquiterpenoids	299.2	41	+	1.93453	4851.28
88223@[M+H]+@RANK1	30452-60-9		C30H48O	424.371	Cyclomusalenone	Triterpenoids	425.4	83.1	+	9.41545	4818.99
67558@[M+H]+@RANK1;88853@[M+H]+@RANK1;95148@[M+H]+@RANK1	5928-25-6;7380-39-4;130848-06-5	C09258	C19H20O5;C20H24O4	328.13107500000001;328.16746000000001	Decursin;5-Geranoxy-7-methoxycoumarin;Decursinol angelate	Coumarins	329.133	175	+	13.7769	4754.72
86638@[M+H]+@RANK1	26063-95-6		C24H28O7	428.184	1-Isomangostin hydrate	Xanthones	429.2	355.1	+	13.4987	4723.73
94882@[M+H]+@RANK1	80510-06-1		C36H36N2O8	624.247	Grossamide	Alkaloids	625.3	121.1	+	13.0819	4662.94
67647@[M+H]+@RANK1	4030-51-7	C09380	C19H19NO5	341.126	Cassyfiline	Alkaloids	342.1	268.1	+	10.6637	4661.66
89138@[M+H]+@RANK1	81426-17-7		C20H22O7	374.137	8-Hydroxypinoresinol	Lignans	375.1	135	+	8.45883	4659.09
1670@[M+H]+@RANK1	630-60-4	C01443	C29H44O12	584.283	g-Strophanthin	Steroids and steroid derivatives	585.3	355.2	+	12.7881	4610.22
63629@[M+H]+@RANK1	21401-21-8	C01855	C14H17NO7	311.101	Taxiphyllin	Phenols	312.1	132	+	13.7622	4554.34
58317@[M+H]+@RANK1	23094-69-1	C10219	C26H20O18	620.065	Corilagin	Phenols	621.1	153	+	8.44205	4530.1
2254@[M+H]+@RANK1	2901-66-8		C23H30N2O5	414.215	Methyl reserpate	Alkaloids	415.2	174.1	+	7.21325	4524.72
43824@[M+H]+@RANK1	1449-05-4		C30H46O4	470.34	18alpha-Glycyrrhetinic acid	Triterpenoids	471.3	177.2	+	9.17977	4444.66
67143@[M+H]+@RANK1	114531-28-1	C08709	C24H33NO4	399.241	Spiramine A	Alkaloids	400.2	340.2	+	9.93622	4439.96
64528@[M+H]+@RANK1	20196-67-2	C08426	C14H19NO10S2	425.045	Sinalbin	Miscellaneous	426.1	151	+	13.2252	4425.42
43889@[M-H]-@RANK1	22910-60-7	C10794	C22H34O3	346.251	Ginkgolic acid C15:1	Phenols	345.2	301.3	-	7.57765	4372.33
45489@[M+H]+@RANK1	138112-76-2		C15H17NO2	243.126	Agomelatine	Miscellaneous	244.1	185.1	+	10.0029	4345.08
STD_989-51-5@-@RANK1	989-51-5	C09731	C22H18O11	458.085	(-)-Epigallocatechin gallate	flavonoids	457	304.7	-	5.14	4339.97
3379@[M-H]-@RANK1	636-58-8	C00669	C8H14N2O5S	250.062	gamma-Glutamylcysteine	Amino acid and derivatives	249.1	128	-	1.53297	4259.19
44853@[M-H]-@RANK1	5957-80-2	C09069	C20H26O4	330.183	Carnosol	Diterpenoids	329.2	285.2	-	12.147	4252.68
71429@[M+H]+@RANK1	20362-31-6	C16915	C27H34O11	534.21	Arctiin	Lignans;Others	535.2	177.1	+	8.23889	4244.82
67945@[M+H]+@RANK1	54081-47-9	C09803	C21H22O11	450.116	Neoastilbin	Flavonoids	451.1	123	+	5.97497	4237.44
67809@[M+H]+@RANK1	475-75-2	C09567	C17H9NO3	275.058	Liriodenine	Alkaloids	276.1	248.1	+	9.68398	4232.69
71426@[M+H]+@RANK1	19533-92-7	C16912	C30H48O4	472.355	Alphitolic acid	Triterpenoids	473.4	409.3	+	10.5567	4205.15
STD_548-83-4@+@RANK1	548-83-4	C10044	C15H10O5	270.053	Galangin	flavonoids	271.2	196.9	+	11.14	4120.63
43843@[M-H]-@RANK1	6559-91-7	C21185	C21H20O8	400.116	4'-Demethylepipodophyllotoxin	Lignans	399.1	369.1	-	8.04958	4113.93
92763@[M+H]+@RANK1	38533-30-1		C21H21O10	433.113	Cyanidin-3-O-rhamnoside chloride	Flavonoids	434.1	271.1	+	7.3241	4110.9
2040@[M+H]+@RANK1	19186-35-7	C10556	C22H22O7	398.137	Deoxypodophyllotoxin	Lignans	399.1	311.1	+	10.0554	4083.39
67613@[M+H]+@RANK1	1862-41-5	C09339	C17H15NO2	265.11	(-)-Anonaine	Alkaloids	266.1	192.1	+	7.4233	4052.96
68103@[M+H]+@RANK1	529-61-3	C10061	C13H8O4	228.042	Euxanthone	Xanthones	229	135	+	8.37492	4015.3
67307@[M+H]+@RANK1	80418-24-2	C08961	C47H80O18	932.534	Notoginsenoside R1	Triterpenoids	933.5	621.4	+	8.64343	3964.92
93160@[M+H]+@RANK1	119170-51-3		C26H30O14	566.164	Cassiaside B	Phenols	567.2	255.1	+	13.1245	3915.02
94834@[M+H]+@RANK1	123702-97-6		C19H18O5	326.115	Moracin O	Phenols	327.1	239.1	+	9.5204	3903.51
3350@[M+H]+@RANK1	304-21-2	C06536	C13H14N2O	214.111	Harmaline	Alkaloids	215.1	172.1	+	10.0022	3893.38
146@[M-H]-@RANK1	643-13-0	C00085	C6H13O9P	260.03	D-Fructose 6-phosphate	Carbohydrates	259	97	-	3.23227	3884.7
87225@[M+H]+@RANK1	56252-05-2		C20H14O2	286.099	2-O-Methylanigorufone	Phenols	287.1	209.1	+	7.56933	3851.56
67050@[M+H]+@RANK1	510-77-0	C08534	C17H19NO3	285.136	Galanthaminone	Alkaloids	286.1	242.1	+	6.9108	3843.85
3593@[M]+@RANK1	472-70-8	C08591	C40H56O	552.433	beta-Cryptoxanthin	Miscellaneous	552.4	460.4	+	13.0805	3825.36
63208@[M+H]+@RANK1		C06217	C36H62O31	990.328	Cellohexaose		991.3	163.1	+	2.14847	3781.99
66510@[M+H]+@RANK1		C06731	C8H10O4	170.058	1,2-Dihydroxy-6-methylcyclohexa-3,5-dienecarboxylate		171.1	39	+	4.19597	3654.13
STD_520-33-2@+@RANK1	520-33-2	C01709	C16H14O6	302.079	Hesperetin	flavonoids	303.3	178.9	+	9.2	3650.24
93263@[M+H]+@RANK1	64032-49-1		C20H24O9	408.142	Torachrysone 8-O-glucoside	Miscellaneous	409.1	229.1	+	12.3003	3642.45
5387@[M+H]+@RANK1;74939@[M+H]+@RANK1	689-31-6	C00846	C6H8O5	160.037	3-Oxoadipic acid	Keto acids and derivatives	161	125	+	2.82728	3600.39
43857@[M+H]+@RANK1	471-53-4		C30H46O4	470.34	Glycyrrhetinic acid	Triterpenoids	471.3	189.2	+	9.22772	3551.07
44483@[M+H]+@RANK1	4670-05-7		C29H24O12	564.127	Theaflavin	Flavonoids	565.1	139	+	7.61442	3549.32
64856@[M+H]+@RANK1	133343-34-7		C15H24N2O7S	376.13	Lactacystin	Miscellaneous	377.1	186.1	+	8.99588	3543.94
209@[M-H]-@RANK1	434-13-9	C03990	C24H40O3	376.298	Lithocholic acid	Steroids	375.3	45	-	3.13763	3508.38
STD_480-44-4@+@RANK1	480-44-4	C01470	C16H12O5	284.068	Acacetin	flavonoids	285.3	269.8	+	11.03	3461.52
49754@[M+H]+@RANK1	632-85-9	C10197	C16H12O5	284.068	Wogonin	Flavonoids	285.1	270.1	+	11.077	3461.52
3421@[M+H]+@RANK1	10597-89-4;61633-75-8	C02713	C11H19NO8	293.111	N-Acetylmuramate	Organooxygen compounds	294.1	58	+	3.77518	3419.03
44437@[M+H]+@RANK1	481-53-8	C10190	C20H20O7	372.121	Tangeretin	Flavonoids	373.1	343.1	+	11.37	3396.63
87208@[M+H]+@RANK1	56222-03-8		C22H26O6	386.173	Porson	Phenols	387.2	313.1	+	7.45185	3262.14
481@[M-H]-@RANK1	600-18-0	C00109	C4H6O3	102.032	2-Ketobutyric acid	Keto acids and derivatives	101	55	-	0.755417	3248.18
92@[M-H]-@RANK1	60-92-4	C00575	C10H12N5O6P	329.053	Cyclic AMP	Nucleotide and its derivates	328	134	-	3.03533	3242.3
68329@[M-H]-@RANK1	30964-13-7	C10445	C25H24O12	516.127	Cynarin;1,5-Dicaffeoylquinic acid	Organic acids	515.1	191.1	-	6.7204	3210.95
3471@[M+H]+@RANK1	633-65-8;2086-83-1	C00757;C12679	C20H17NO4	335.116	Berberine hydrochloride	Alkaloids	336.1	320.1	+	8.34747	3199.79
66894@[M+H]+@RANK1	2644-49-7	C08298	C5H8N2O4	160.048	Tricholomic acid	Carboxylic acids and derivatives	161.1	86	+	3.60857	3195.46
3367@[M-H]-@RANK1	951-77-9	C00881	C9H13N3O4	227.091	Deoxycytidine	Nucleotide and its derivates	226.1	93	-	3.00447	3173.23
41244@[M+H]+@RANK1	15291-75-5	C07601	C20H24O9	408.142	Ginkgolide A	Diterpenoids	409.1	79	+	8.27149	3106.52
87846@[M+H]+@RANK1	501-33-7		C7H13NO	127.1	8-Azabicyclo-3.2.1-octan-3-ol	Alkaloids	128.1	110.1	+	14.0919	3087.89
87698@[M-H]-@RANK1	36752-54-2		C21H32O3	332.235	10-Shogaol	Phenols	331.2	195.2	-	7.50397	3081.98
1098@[M+H]+@RANK1	61-68-7	C02168	C15H15NO2	241.11	5,7-Dihydroxyisoflavone	Flavonoids	242.1	224.1	+	14.2392	3051.64
52508@[M+H]+@RANK1	6515-36-2	C14290	C15H12O3	240.079	7-Hydroxyflavanone	Flavonoids	241.1	101	+	4.81443	2985.98
43591@[M-H]-@RANK1	34157-83-0		C29H38O4	450.277	Celastrol	Triterpenoids	449.3	200.1	-	1.42822	2916.47
6445@[M-H]-@RANK1	645-65-8	C02835	C5H6N2O2	126.043	Imidazole-4-acetate;Imidazoleacetic acid	Indole derivatives;Azoles	125	81	-	2.54988	2905.44
3306@[M-H]-@RANK1	2466-09-3	C00013	H4O7P2	177.943	Pyrophosphate	Non-metal oxoanionic compounds	176.9	79	-	4.9666	2902.47
43835@[M+NA]+@RANK1	508-77-0	C08859	C30H44O9	548.299	Cymarin	Steroids and steroid derivatives	571.3	427.2	+	9.10968	2874.16
86690@[M+H]+@RANK1;86985@[M+H]+@RANK1;87085@[M+H]+@RANK1	23665-96-5;6903-07-7;13179-11-8		C22H32O2;C18H16O6	328.24023;328.09469000000001	Neogrifolin;Grifolin;Ugaxanthone	Phenols;Xanthones	329.167	55.1	+	13.7958	2873.94
47834@[M+H]+@RANK1	1156-78-1	C12134	C15H10O6	286.048	2'-Hydroxygenistein	Flavonoids	287.1	177	+	7.58612	2870.93
67470@[M+H]+@RANK1	519-23-3	C09154	C17H14N2	246.116	Ellipticine	Alkaloids	247.1	231.1	+	8.05603	2791.46
44073@[M-H]-@RANK1	521-52-8		C19H14O5	322.084	Vulpic acid	Miscellaneous	321.1	190.1	-	1.5737	2746.89
53316@[M+H]+@RANK1	491-09-8	C01951	C10H14O	150.104	Piperitenone	Prenol lipids	151.1	39	+	9.91893	2734.59
64373@[M+H]+@RANK1	3486-67-7	C05315	C21H22NO4	352.155	Palmatine	Alkaloids	353.2	306.1	+	8.10591	2653.35
45736@[M+H]+@RANK1	552-59-0	C10521	C16H12O5	284.068	Prunetin	Flavonoids	285.1	242.1	+	11.0732	2644.01
94106@[M+H]+@RANK1	80321-69-3		C48H82O18	946.55	Gypenoside XVII	Triterpenoids	947.6	767.5	+	1.97212	2617.53
368@[M-H]-@RANK1	617-12-9	C00251	C10H10O6	226.048	Chorismate	Carboxylic acids and derivatives	225	93	-	6.69785	2532.51
68137@[M+H]+@RANK1	2114-92-3	C10130	C20H26N2O	310.205	Astrocasine	Alkaloids	311.2	103.1	+	13.9371	2513.51
71424@[M+H]+@RANK1	470-67-7	C16909	C10H18O	154.136	1,4-Cineole	Monoterpenoids	155.1	139.1	+	3.37362	2488.15
44037@[M-H]-@RANK1	1621-84-7;520-31-0	C10192;C10079	C15H10O7	302.043	Tricetin	Flavonoids	301	151	-	8.04609	2487.33
STD_2306-27-6@+@RANK1	2306-27-6	C10186	C20H20O7	372.121	sinensetin	flavonoids	373	357.4	+	10.34	2484.8
126@[M-H]-@RANK1	1077-28-7;62-46-4	C00725	C8H14O2S2	206.044	Lipoic acid	Organic acids and derivatives	205	65	-	4.9015	2458.31
114@[M-H]-@RANK1	110-15-6	C00042	C4H6O4	118.027	Succinic acid	Organic acids	117	73	-	12.5572	2434.96
94974@[M+H]+@RANK1	142750-32-1		C30H26O13	594.137	Buddlenoid A	Flavonoids	595.1	287.1	+	8.16927	2434.66
203@[M+H]+@RANK1;5604@[M+H]+@RANK1	360-65-6;640-79-9	C05464;C05466	C26H43NO5	449.314	Glycodeoxycholic acid;Glycodeoxycholate;Glycochenodeoxycholate	Steroids;Steroids and steroid derivatives	450.3	76	+	5.55538	2348.08
STD_3572-64-3@-@RANK1	3572-64-3		C12H20O3	212.141	Dihydrojasmonic Acid	phytohormone	211	59	-	9.82	2332.82
756@[M+H]+@RANK1	56180-94-0	C06802	C25H43NO18	645.248	Acarbose	Alkaloids	646.3	163.1	+	6.98995	2301.71
102@[M+H]+@RANK1	53-59-8	C00006	C21H28N7O17P3	743.075	NADP	Nucleotide and its derivates	744.1	604	+	2.292	2286.27
68215@[M+H]+@RANK1	22595-00-2	C10280	C31H45NO8	559.315	Auriculine	Alkaloids	560.3	124.1	+	7.51898	2245.14
92637@[M+H]+@RANK1	34096-83-8		C36H54O10	646.372	Glycyrrhetic acid 3-O-mono-beta-D-glucuronide	Triterpenoids	647.4	453.3	+	14.0272	2193.92
69377@[M+H]+@RANK1	6900-99-8	C12226	C20H15NO4	333.1	Norchelerythrine	Alkaloids	334.1	304.1	+	7.46863	2176.18
STD_510-75-8@-@RANK1	510-75-8	C11867	C19H22O5	330.147	Gibberellin A7	phytohormone	329	223	-	9.85	2167.67
89146@[M+H]+@RANK1	102067-92-5		C27H20O13	552.09	Epitheaflagallin 3-O-gallate	Flavonoids	553.1	139	+	10.1875	2165.94
38@[M-H]-@RANK1	305-84-0	C00386	C9H14N4O3	226.107	L-carnosine	Amino acid and derivatives	225.1	110.1	-	5.57972	2120.47
52097@[M-H]-@RANK1	6754-58-1	C16417	C21H22O5	354.147	Xanthohumol	Flavanone	353.1	119.1	-	10.9575	2107.69
61661@[M+H]+@RANK1;61674@[M+H]+@RANK1		C03033	C34H52O8	588.366	25-Hydroxyvitamin D2-25-glucuronide;25-Hydroxyvitamin D2 25-(beta-glucuronide)	Organooxygen compounds	589.4	395.3	+	13.6951	2098.59
STD_40957-83-3@+@RANK1	40957-83-3	C14536	C16H12O5	284.068	Glycitein	flavonoids	285.3	269.8	+	7.91	2080.36
68059@[M+H]+@RANK1	99624-92-7	C09976	C20H22O4	326.152	Uncinatone	Diterpenoids	327.2	283.1	+	11.0098	2061.5
71462@[M+H]+@RANK1	19912-61-9	C16959	C15H20O	216.151	Furanodiene	Sesquiterpenoids	217.2	201.1	+	10.0196	2052.91
68262@[M+H]+@RANK1	6029-86-3	C10344	C20H27NO7	393.179	Latifoline	Alkaloids	394.2	55.1	+	8.55952	2034.12
64449@[M+H]+@RANK1	90-39-1	C10783	C15H26N2	234.21	Sparteine	Alkaloids	235.2	219.2	+	8.05603	2014.92
68169@[M+H]+@RANK1	20069-09-4	C10166	C17H19NO5	317.126	Piplartine	Alkaloids	318.1	221.1	+	6.07565	1895.06
395@[M-H]-@RANK1	764-22-7	C00836	C18H39NO2	301.298	Sphinganine	Organonitrogen compounds	300.3	58	-	10.0641	1815.56
43695@[M+H]+@RANK1	511-15-9		C20H30O	286.23	Totarol	Diterpenoids	287.2	271.2	+	5.69713	1752.77
64361@[M+H]+@RANK1	483-44-3	C05174	C19H19NO4	325.131	Cheilanthifoline	Miscellaneous	326.1	268.1	+	14.1314	1724.44
44097@[M+H]+@RANK1	481-49-2	C09391	C37H38N2O6	606.273	Cepharanthine	Alkaloids	607.3	576.2	+	13.5063	1594.69
3897@[M-H]-@RANK1	17320-10-4		C27H46O2	402.35	4-Beta-Hydroxycholesterol	Steroids	401.3	355.3	-	8.22497	1593.52
44191@[M+H]+@RANK1	3836-11-9;6836-11-9	C08679	C27H41NO8	507.283	Deltaline	Alkaloids	508.3	476.3	+	7.55057	1580.63
67526@[M+H]+@RANK1	23360-92-1	C09219	C46H56N4O9	808.405	Vinleurosine	Alkaloids	809.4	749.4	+	11.2616	1566.78
1136@[M+H]+@RANK1	134523-00-5	C06834	C33H35FN2O5	558.253	Atorvastatin	Pyrroles	559.3	440.2	+	13.3482	1547
41667@[M-H]-@RANK1	6199-67-3	C08794	C32H46O8	558.319	Cucurbitacin B	Triterpenoids	557.3	497.3	-	11.1853	1542.11
86799@[M+H]+@RANK1	24123-92-0		C20H21NO3	323.152	Koenigicine	Alkaloids	324.2	266.1	+	6.5288	1533.33
95478@[M+H]+@RANK1	51771-49-4		C22H31ClO8	458.171	Valechlorine	Iridoids	459.2	85.1	+	0.625483	1520.41
43817@[M-H]-@RANK1	2316-26-9		C11H12O4	208.074	3,4-Dimethoxycinnamic acid	Phenylpropanoids	207.1	103.1	-	14.0761	1514.58
3464@[M-H]-@RANK1	60203-57-8	C05957	C20H30O4	334.214	Prostaglandin J2	Fatty Acyls	333.2	189.1	-	7.33157	1512.72
STD_117-39-5@-@RANK1	117-39-5	C00389	C15H10O7	302.043	Quercetin	flavonoids	300.9	272.9	-	8.07	1507.82
84998@[M+H]+@RANK1	58543-17-2		C38H60O18	804.378	Rebaudioside B	Diterpenoids	805.4	325.1	+	13.9468	1497.01
52871@[M+H]+@RANK1	11013-97-1	C17393	C29H36O15	624.205	Methyl hesperidin	Flavonoids	625.2	317.1	+	12.9902	1325.34
43847@[M+H]+@RANK1	522-87-2		C20H24N2O3	340.179	Yohimbic acid monohydrate	Alkaloids	341.2	144.1	+	13.7488	1300.42
68223@[M+H]+@RANK1;71673@[M+H]+@RANK1	5162-01-6;24502-79-2	C10293;C17415	C21H22O6	370.142	Isoarnebin I;Dimethylacrylshikonin	Quinones	371.1	55.1	+	7.77073	1257.37
68502@[M+H]+@RANK1	5876-17-5	C10694	C13H11NO4	245.069	Haplopine	Alkaloids	246.1	214.1	+	8.71057	1242.11
4240@[M-H]-@RANK1	111-20-6	C08277	C10H18O4	202.121	Sebacic acid	Organic acids	201.1	139.1	-	9.55662	1202.16
STD_20316-62-5@+@RANK1	20316-62-5	C17140	C30H26O13	594.137	Tiliroside	flavonoids	595	308.8	+	7.92	1166.93
101@[M+H]+@RANK1	53-84-9	C00003	C21H27N7O14P2	663.109	Nicotinic acid adenine dinucleotide;NAD	Nucleotide and its derivates	664.1	136.1	+	0.753433	1136.23
71771@[M+H]+@RANK1	34367-04-9	C17543	C48H76O19	956.498	Ginsenoside Ro	Triterpenoids	957.5	777.4	+	9.58498	1065.13
44470@[M-H]-@RANK1	3187-58-4		C9H10O4	182.058	Methyl orsellinate	Phenols	181.1	149	-	14.2665	1017.38
68034@[M-H]-@RANK1	500-64-1	C09947	C14H14O3	230.094	Kawain;(R)-Kawain	Phenols	229.1	153.1	-	1.65082	997.824
5433@[M-H]-@RANK1	488-93-7		C5H4O3	112.016	Furan-3-carboxylic acid	Phenols	111	67	-	13.772	983.01
64370@[M+H]+@RANK1	483-34-1	C04118	C20H23NO4	341.163	(-)-Isocorypalmine	Alkaloids	342.2	310.1	+	6.76375	964.472
STD_20315-25-7@+@RANK1	20315-25-7		C30H26O12	578.142	Procyanidin B1	flavonoids	579.5	426.8	+	4.03	944.236
365@[M-H]-@RANK1	2147-61-7	C02794	C10H12N2O4	224.08	3-Hydroxykynurenine	Amino acid and derivatives	223.1	147	-	10.1696	916.795
45475@[M+H]+@RANK1	184475-35-2		C22H24ClFN4O3	446.152	Gefitinib	Alkaloids	447.2	128.1	+	8.91197	869.023
52724@[M+H]+@RANK1	14259-46-2	C09793	C27H32O14	580.179	Narirutin	Flavonoids	581.2	255.1	+	11.9161	842.657
2216@[M+H]+@RANK1	85441-61-8	C07398	C25H30N2O5	438.215	Quinapril	Carboxylic acids and derivatives	439.2	234.1	+	8.72427	667.627
43989@[M-H]-@RANK1	497-76-7	C06186	C12H16O7	272.09	Arbutin	Phenols	271.1	108	-	4.6513	660.797
STD_480-19-3@+@RANK1	480-19-3	C10084	C16H12O7	316.058	Isorhamnetin	flavonoids	317.1	302.1	+	9.23	640.526
95053@[M-H]-@RANK1	143615-75-2		C21H32O6	380.22	Diacetoxy-6-gingerdiol	Phenols	379.2	59	-	4.50777	609.39
65502@[M+H]+@RANK1	3616-04-4;107-73-3	C00588	C4H12NO4P	169.05	O-Phosphocholine	Cholines	170.1	74.1	+	14.2657	584.189
STD_64820-99-1@+@RANK1	64820-99-1	C12628	C27H30O14	578.164	Vitexin rhamnoside	flavonoids	579.5	432.8	+	6.78	474.165
69008@[M+H]+@RANK1	2922-56-7	C11347	C11H19N3O6S	321.099	S-(methyl)glutathione	Amino acid and derivatives	322.1	76	+	14.2657	341.226
